# Supplementary material for: Chemical fixation of atmospheric CO2 in tricopper(ii)-carbonato complexes with tetradentate N-donor ligands: reactive intermediates, probable mechanisms, and catalytic and magneto-structural studies
Source: Royal Society of Chemistry journal article supplement (doi:10.1039/d4dt00503a), 2024-01-01
Supplement: d4dt00503a1.pdf [file d4dt00503a1.pdf]

## **Chemical fixation of atmospheric CO<sub>2</sub> in tricopper(ii)-carbonato complexes with tetradentate N-donor ligands: reactive intermediates, probable mechanism, catalytic and magneto-structural studies**

Narayan Ch. Jana,<sup>a,b</sup> Yu-Chen Sun,<sup>c</sup> Radovan Herchel,<sup>d</sup> Rakhi Nandy,<sup>e</sup> Paula Brandão,<sup>f</sup> Bidraha Bagh,<sup>b</sup> Xin-Yi Wang,<sup>c</sup> Anangamohan Panja<sup>a,e\*</sup>

<sup>a</sup>*Department of Chemistry, Panskura Banamali College, Panskura RS, WB 721152, India. E-mail: ampanja@yahoo.co.in*

<sup>b</sup>*School of Chemical Sciences, National Institute of Science Education and Research (NISER), P.O. - Bhimpur-Padanpur, Jatni – 752050, Dist. -Khurda, Odisha, India*

<sup>c</sup>*State Key Laboratory of Coordination Chemistry, Collaborative Innovation Center of Advanced Microstructures, School of Chemistry and Chemical Engineering, Nanjing University, Nanjing, 210023, China. E-mail: wangxy66@nju.edu.cn*

<sup>d</sup>*Department of Inorganic Chemistry, Faculty of Science, Palacký University, 17. listopadu 12, 77146 Olomouc, Czech Republic*

<sup>e</sup>*Department of Chemistry, Gokhale Memorial Girls' College, 1/1 Harish Mukherjee Road, Kolkata 700020, India*

<sup>f</sup>*Department of Chemistry, CICECO-Aveiro Institute of Materials, University of Aveiro, 3810-193 Aveiro, Portugal*

## Table of Contents

|                                                                                                                                                                                                                                                                                                                                                 |    |
|-------------------------------------------------------------------------------------------------------------------------------------------------------------------------------------------------------------------------------------------------------------------------------------------------------------------------------------------------|----|
| <b>NMR Data of the Ligands</b> .....                                                                                                                                                                                                                                                                                                            | 4  |
| <b>Fig. S1.</b> <sup>1</sup> H NMR of ( <i>E</i> )- <i>N</i> <sup>1</sup> , <i>N</i> <sup>1</sup> -dimethyl- <i>N</i> <sup>3</sup> -(3-((pyridin-2-ylmethylene)amino)propyl)propane-1,3-diamine ( <b>L</b> <sup>1</sup> ) in CDCl <sub>3</sub> at r.t. ....                                                                                     | 5  |
| <b>Fig. S2.</b> <sup>13</sup> C NMR of ( <i>E</i> )- <i>N</i> <sup>1</sup> , <i>N</i> <sup>1</sup> -dimethyl- <i>N</i> <sup>3</sup> -(3-((pyridin-2-ylmethylene)amino)propyl)propane-1,3-diamine ( <b>L</b> <sup>1</sup> ) in CDCl <sub>3</sub> at r.t. ....                                                                                    | 5  |
| <b>Fig. S3.</b> <sup>1</sup> H NMR of ( <i>E</i> )- <i>N</i> <sup>1</sup> , <i>N</i> <sup>1</sup> -dimethyl- <i>N</i> <sup>3</sup> -(3-((1-(pyrazin-2-yl)ethylidene)amino)propyl)propane-1,3-diamine ( <b>L</b> <sup>2</sup> ) in CDCl <sub>3</sub> at r.t. ....                                                                                | 6  |
| <b>Fig. S4.</b> <sup>13</sup> C NMR of ( <i>E</i> )- <i>N</i> <sup>1</sup> , <i>N</i> <sup>1</sup> -dimethyl- <i>N</i> <sup>3</sup> -(3-((1-(pyrazin-2-yl)ethylidene)amino)propyl)propane-1,3-diamine ( <b>L</b> <sup>2</sup> ) in CDCl <sub>3</sub> at r.t. ....                                                                               | 6  |
| <b>Fig. S5.</b> <sup>1</sup> H NMR of ( <i>E</i> )-2-(((3-((3-(dimethylamino)propyl)amino)propyl)imino)methyl)phenol ( <b>HL</b> <sup>3</sup> ) in CDCl <sub>3</sub> at r.t. ....                                                                                                                                                               | 7  |
| <b>Fig. S6.</b> <sup>13</sup> C NMR of ( <i>E</i> )-2-(((3-((3-(dimethylamino)propyl)amino)propyl)imino)methyl)phenol ( <b>HL</b> <sup>3</sup> ) in CDCl <sub>3</sub> at r.t. ....                                                                                                                                                              | 7  |
| <b>Fig. S7.</b> PXRD of complex <b>1</b> .....                                                                                                                                                                                                                                                                                                  | 8  |
| <b>Fig. S8.</b> PXRD of complex <b>2</b> .....                                                                                                                                                                                                                                                                                                  | 8  |
| <b>Fig. S9.</b> FT-IR spectrum of complex <b>1</b> .....                                                                                                                                                                                                                                                                                        | 9  |
| <b>Fig. S10.</b> FT-IR spectrum of complex <b>2</b> .....                                                                                                                                                                                                                                                                                       | 9  |
| <b>Fig. S12.</b> A part of the packing of complex <b>1</b> showing hydrogen bonding and anion-π interactions.....                                                                                                                                                                                                                               | 10 |
| <b>Fig. S13.</b> A part of crystal packing of <b>3</b> showing hydrogen bonding, C-H···π and π-π stacking interactions .                                                                                                                                                                                                                        | 10 |
| <b>Fig. S14.</b> Time resolved spectral profiles for the oxidation of substrates modelling function of CAO and PHS catalysed by complex <b>3</b> in air-saturated methanol. ....                                                                                                                                                                | 10 |
| <b>Fig. S15.</b> HR-MS data of complex <b>1</b> in methanol showing <i>m/z</i> = 410.0745 for species [Cu <sup>II</sup> (L <sup>1</sup> )(ClO <sub>4</sub> ) <sup>+</sup> (calculated <i>m/z</i> = 410.0782) and <i>m/z</i> = 310.1191 for species [Cu <sup>II</sup> (L <sup>1</sup> )-H] <sup>+</sup> (calculated <i>m/z</i> = 310.1210). .... | 11 |
| <b>Fig. S16.</b> HR-MS data of complex <b>1</b> in presence of <i>o</i> -aminophenol in methanol showing <i>m/z</i> = 458.0871 for complex-substrate intermediate species [KCu(L <sup>1</sup> )(OAP)] <sup>+</sup> (calculated <i>m/z</i> = 458.1363). ....                                                                                     | 12 |
| <b>Fig. S17.</b> EPR spectra of complex <b>1</b> and <b>2</b> in both solid and solution state as well. (frequency = 9.44 GHz; modulation = 1.0 mT; power = 0.841 mW).....                                                                                                                                                                      | 13 |
| <b>Fig. S18.</b> HR-MS data of complex <b>1</b> in presence of benzyl alcohol in methanol. ....                                                                                                                                                                                                                                                 | 14 |
| <b>Scheme S1.</b> Bond angles those are important for magneto-structural correlation. ....                                                                                                                                                                                                                                                      | 15 |
| <b>Crystal structure description of dinuclear carbonato-bridged complex (2-I)</b> .....                                                                                                                                                                                                                                                         | 15 |
| <b>Table S1.</b> Crystal details and structure refinement parameters of complexes <b>1-3</b> and <b>2-I</b> . ....                                                                                                                                                                                                                              | 16 |
| <b>Table S2.</b> Selected bond angles for complexes <b>1-3</b> .....                                                                                                                                                                                                                                                                            | 16 |
| <b>Table S3.</b> Magneto-structural data for syn-anti carbonato bridged trinuclear copper(II) complexes <sup>a</sup> .....                                                                                                                                                                                                                      | 17 |
| <b>Table S4.</b> The reaction Gibbs energies for OAPH oxidation calculated with PBE0/def2 TZVP/D4/CPCM(methanol) for species based on compounds <b>1-2</b> .....                                                                                                                                                                                | 18 |
| Selected molecular structures of intermediate complexes of <b>1</b> overlaid with the spin density distribution:.                                                                                                                                                                                                                               | 18 |

|                                                                                                                                                                                 |    |
|---------------------------------------------------------------------------------------------------------------------------------------------------------------------------------|----|
| <b>Table S5.</b> The reaction Gibbs energies for benzyl alcohol oxidation calculated with PBE0/def2-TZVP/D4/CPCM (acetonitrile) for species based on compounds <b>1-2</b> ..... | 19 |
| Selected molecular structures of intermediate complexes of <b>1</b> overlaid with the spin density distribution:.                                                               | 19 |
| Selected molecular structures of intermediate complexes of <b>2</b> overlaid with the spin density distribution:.                                                               | 20 |
| <b>NMR data of the products:</b> .....                                                                                                                                          | 21 |
| <b>NMR spectra of the products:</b> .....                                                                                                                                       | 24 |
| <b>References</b> .....                                                                                                                                                         | 40 |

## NMR Data of the Ligands

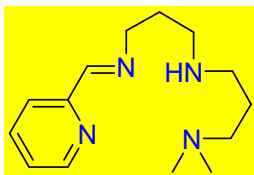

L<sup>1</sup>: <sup>1</sup>H NMR (700 MHz, CDCl<sub>3</sub>) δ 8.57 (s, 1H), 7.68 – 7.58 (m, 1H), 7.44 – 6.93 (m, 2H), 4.04 (d, *J* = 5.5 Hz, 1H), 3.27 (d, *J* = 11.1 Hz, 1H), 3.14 (d, *J* = 13.3 Hz, 1H), 2.75 (t, *J* = 13.0 Hz, 1H), 2.41 – 2.14 (m, 4H), 2.10 – 2.05 (m, 6H), 2.02 – 1.93 (m, 2H), 1.87 (dd, *J* = 12.2, 4.2 Hz, 1H), 1.66 – 1.42 (m, 3H). <sup>13</sup>C NMR (176 MHz, CDCl<sub>3</sub>) δ 160.20 (s), 149.85 (s), 136.69 (s), 123.10 (s), 122.73 (s), 81.85 (s), 77.36 (s), 77.25 (d, *J* = 32.0 Hz), 76.98 (s), 57.79 (s), 52.19 (s), 51.83 (s), 45.33 (d, *J* = 9.8 Hz), 26.98 (s), 24.59 (s).

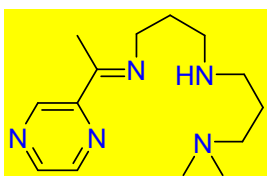

L<sup>2</sup>: <sup>1</sup>H NMR (700 MHz, CDCl<sub>3</sub>) δ 9.27 (d, *J* = 1.4 Hz, 1H), 8.50 (dd, *J* = 12.0, 9.6 Hz, 2H), 3.58 (s, 2H), 2.76 (dd, *J* = 9.2, 6.8 Hz, 2H), 2.65 (dd, *J* = 9.2, 6.8 Hz, 2H), 2.30 (d, *J* = 1.9 Hz, 3H), 2.29 – 2.27 (m, 2H), 2.18 (d, *J* = 2.6 Hz, 6H), 1.95 – 1.91 (m, 2H), 1.68 – 1.61 (m, 3H). <sup>13</sup>C NMR (176 MHz, CDCl<sub>3</sub>) δ 165.14 (s), 152.40 (s), 144.48 (s), 143.49 (s), 142.69 (s), 77.34 (s), 77.16 (s), 76.98 (s), 58.15 (s), 50.93 (s), 48.60 (s), 48.48 (s), 45.64 (s), 31.12 (s), 28.25 (s), 13.70 (s).

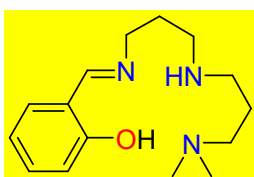

HL<sup>3</sup>: <sup>1</sup>H NMR (400 MHz, CDCl<sub>3</sub>) δ 8.32 (s, 1H), 7.32 – 7.13 (m, 3H), 6.99 – 6.76 (m, 3H), 3.62 (s, 2H), 2.66 (d, *J* = 20.6 Hz, 4H), 2.28 (s, 2H), 2.17 (s, 6H), 1.85 (s, 2H), 1.64 (dd, *J* = 13.4, 6.6 Hz, 3H), 1.23 (s, 1H). <sup>13</sup>C NMR (101 MHz, CDCl<sub>3</sub>) δ 164.95 (s), 161.24 (s), 132.11 (s), 131.15 (s), 118.54 (s), 116.98 (s), 77.48 (s), 77.16 (s), 76.84 (s), 57.71 (d, *J* = 67.0 Hz), 57.28 – 57.09 (m), 48.53 (s), 47.48 (s), 45.49 (s), 31.05 (s), 27.73 (s).

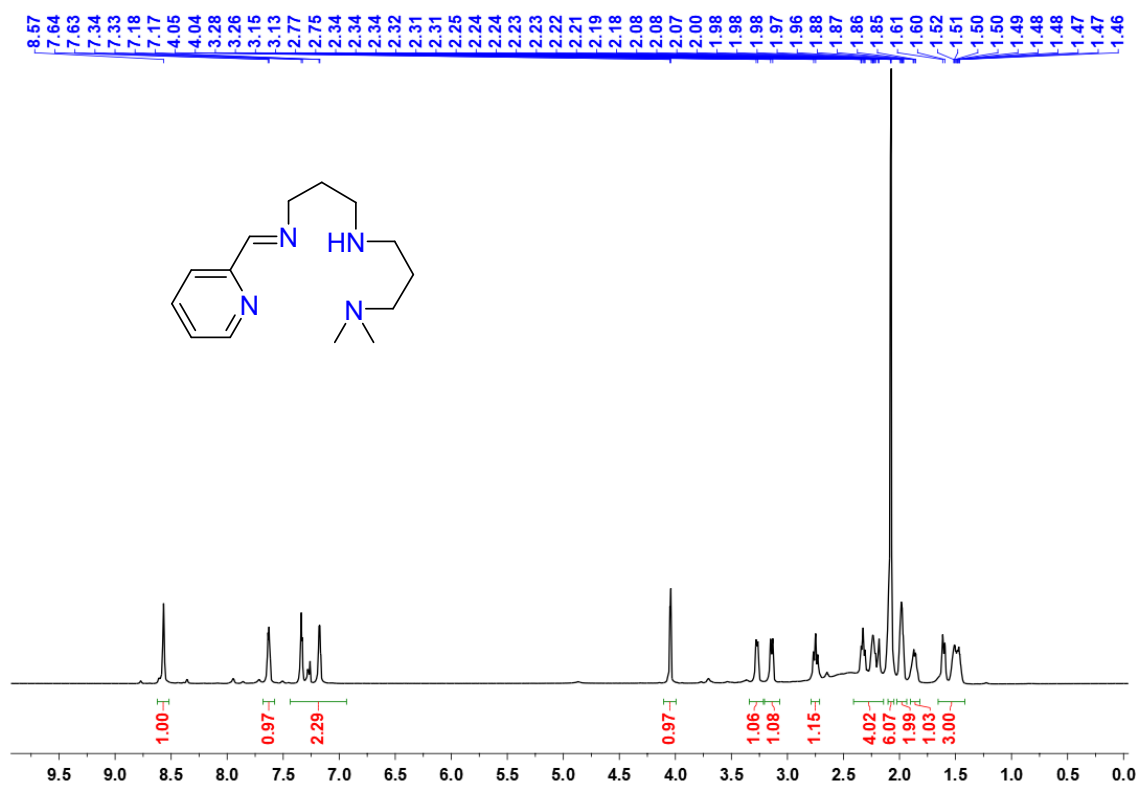

**Fig. S1.**  $^1\text{H}$  NMR of  $(E)$ - $N^1,N^1$ -dimethyl- $N^3$ -(3-((pyridin-2-ylmethylene)amino)propyl)propane-1,3-diamine ( $L^1$ ) in CDCl<sub>3</sub> at r.t.

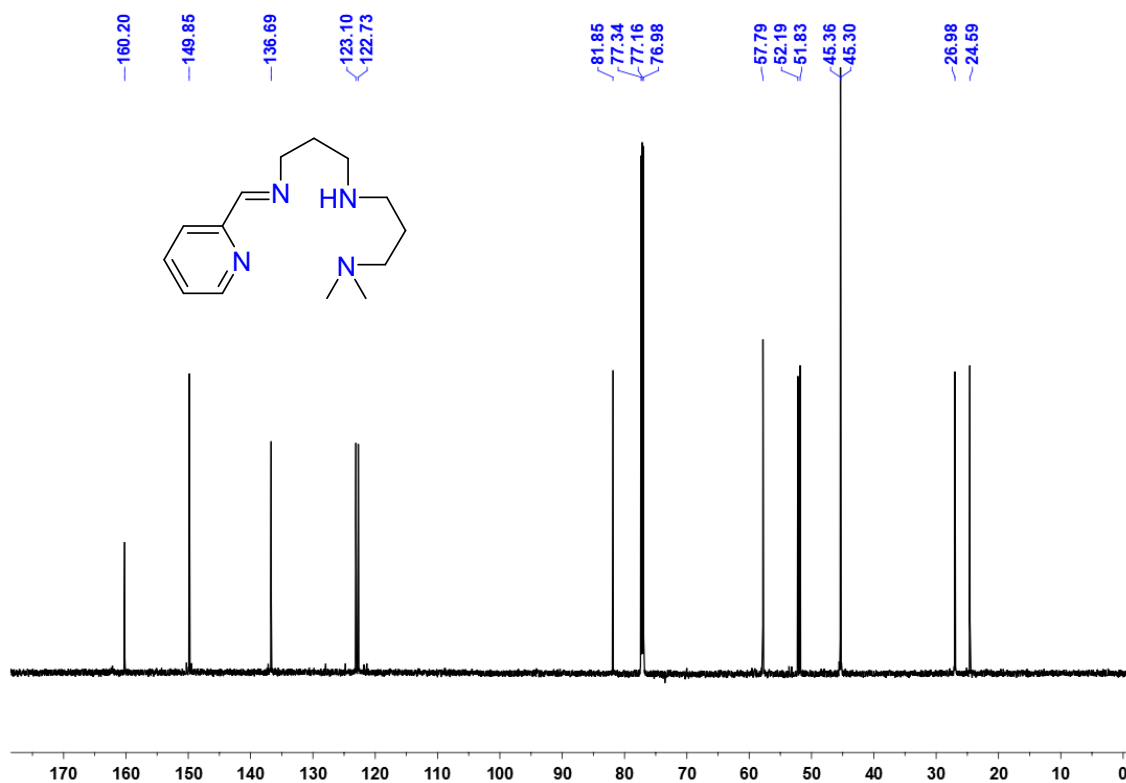

**Fig. S2.**  $^{13}\text{C}$  NMR of  $(E)$ - $N^1,N^1$ -dimethyl- $N^3$ -(3-((pyridin-2-ylmethylene)amino)propyl)propane-1,3-diamine ( $L^1$ ) in CDCl<sub>3</sub> at r.t.

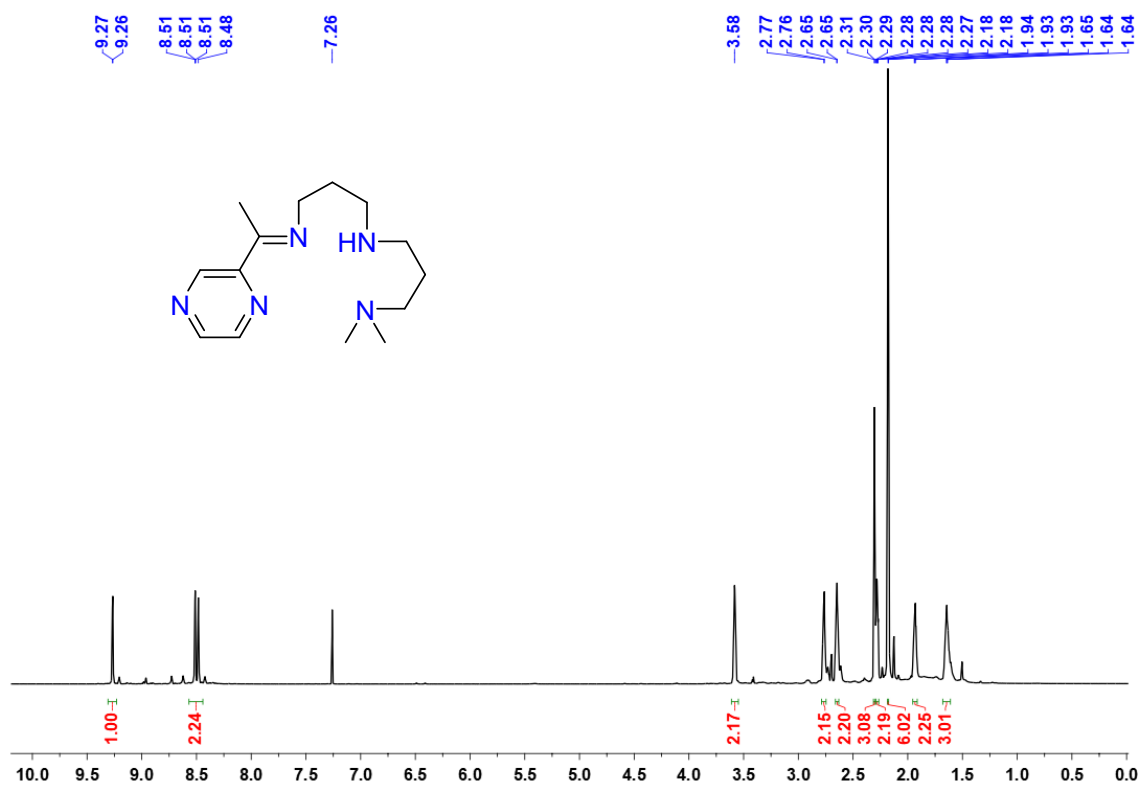

**Fig. S3.** <sup>1</sup>H NMR of *(E)*-*N*<sup>1</sup>,*N*<sup>1</sup>-dimethyl-*N*<sup>3</sup>-(3-((1-(pyrazin-2-yl)ethylidene)amino)propyl)propane-1,3-diamine (**L**<sup>2</sup>) in CDCl<sub>3</sub> at r.t.

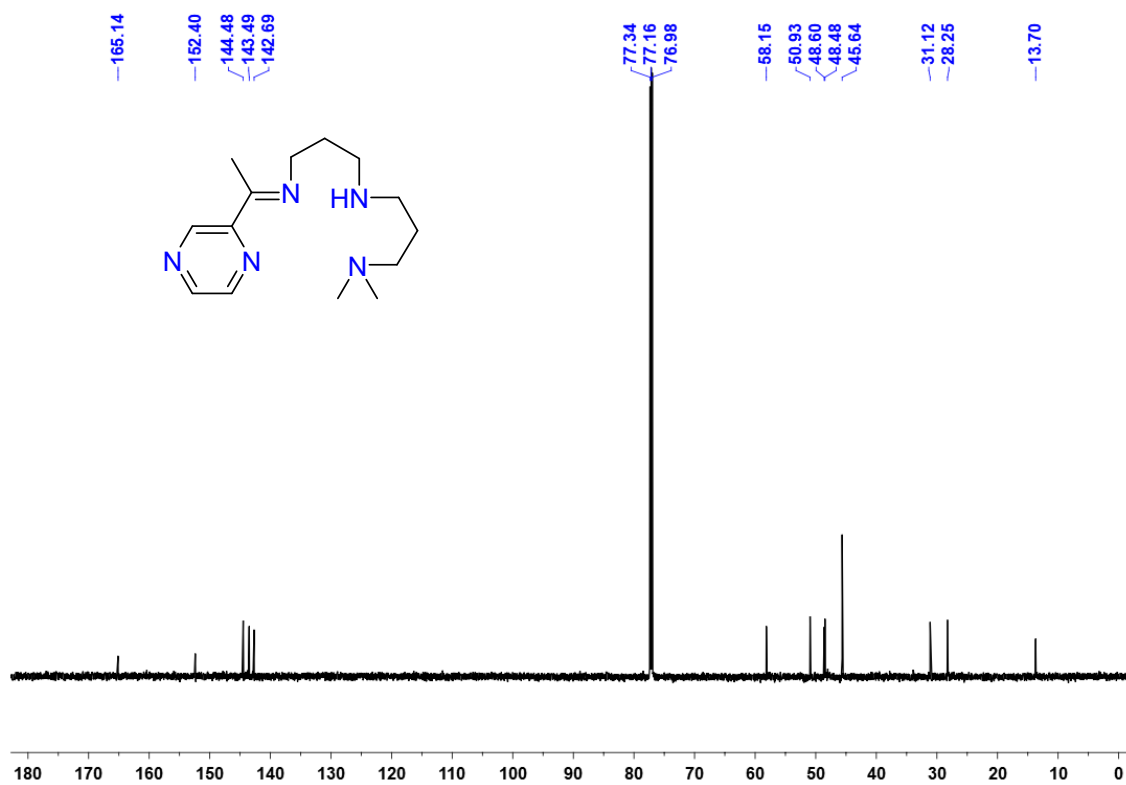

**Fig. S4.** <sup>13</sup>C NMR of *(E)*-*N*<sup>1</sup>,*N*<sup>1</sup>-dimethyl-*N*<sup>3</sup>-(3-((1-(pyrazin-2-yl)ethylidene)amino)propyl)propane-1,3-diamine (**L**<sup>2</sup>) in CDCl<sub>3</sub> at r.t.

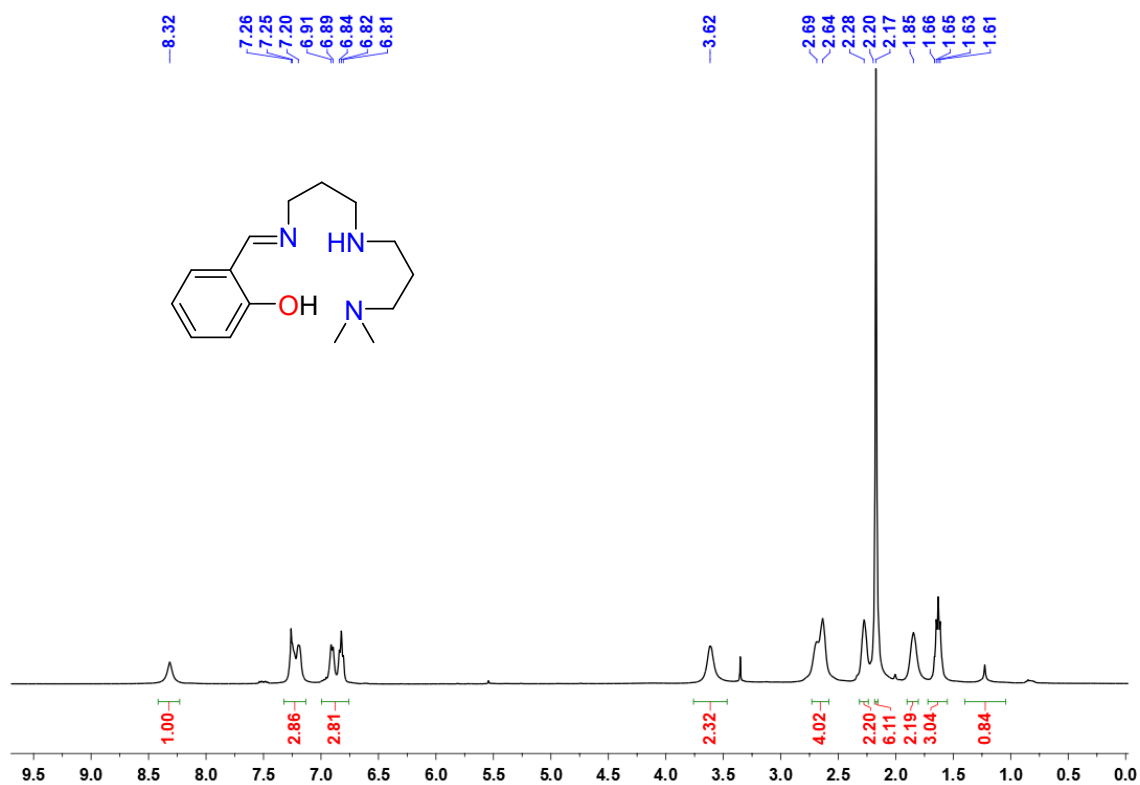

**Fig. S5.**  $^1H$  NMR of  $(E)$ -2-(((3-((3-(dimethylamino)propyl)amino)propyl)imino)methyl)phenol ( $HL^3$ ) in  $CDCl_3$  at r.t.

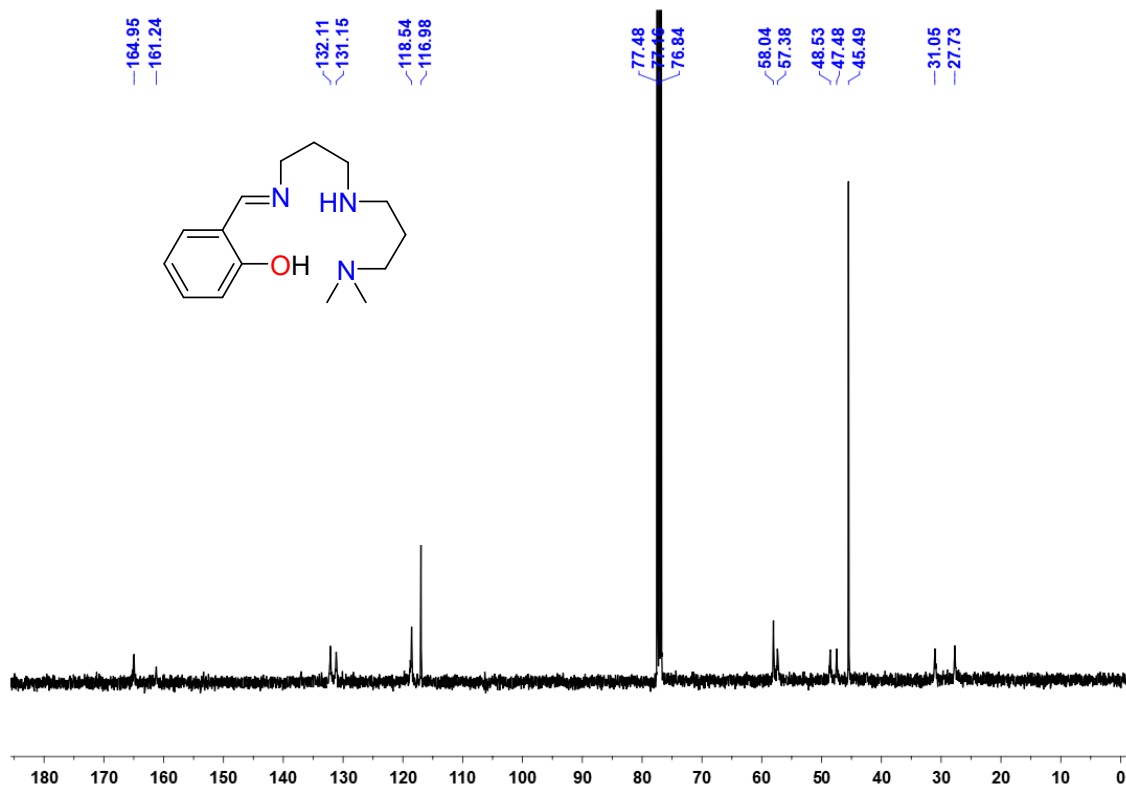

**Fig. S6.**  $^{13}C$  NMR of  $(E)$ -2-(((3-((3-(dimethylamino)propyl)amino)propyl)imino)methyl)phenol ( $HL^3$ ) in  $CDCl_3$  at r.t.

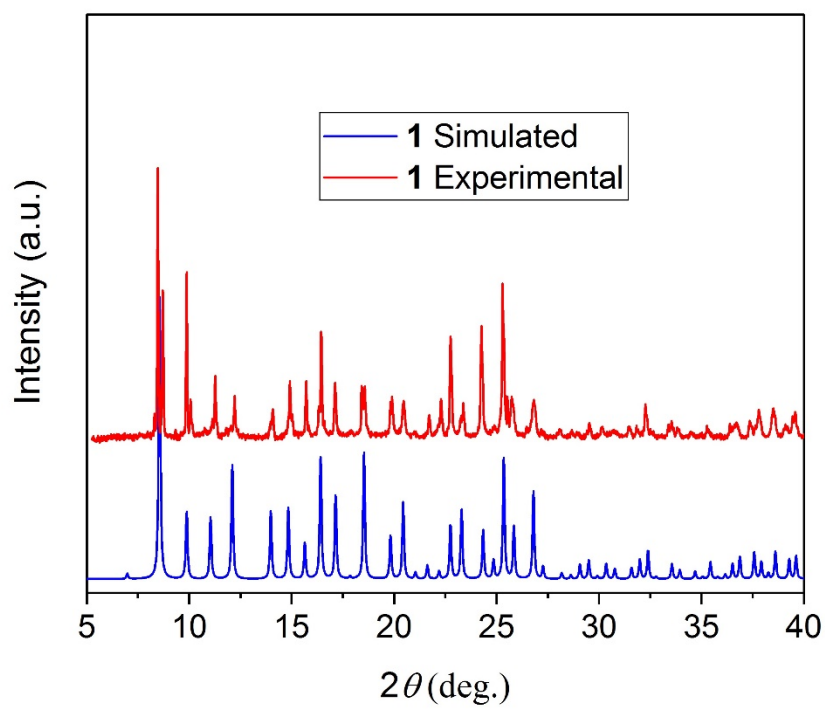

Fig. S7. PXRD of complex 1

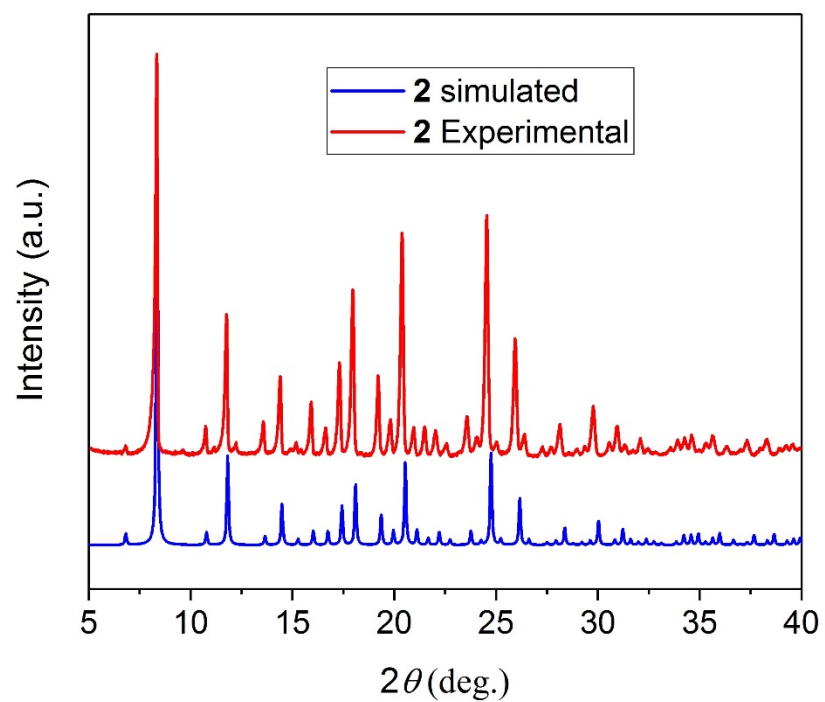

Fig. S8. PXRD of complex 2



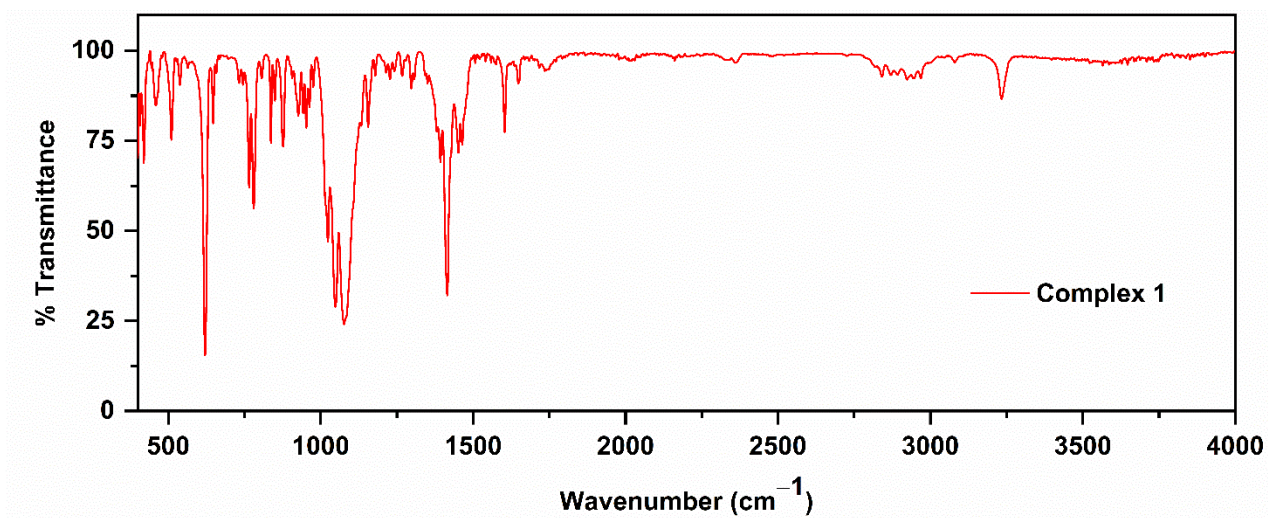

Fig. S9. FT-IR spectrum of complex 1.

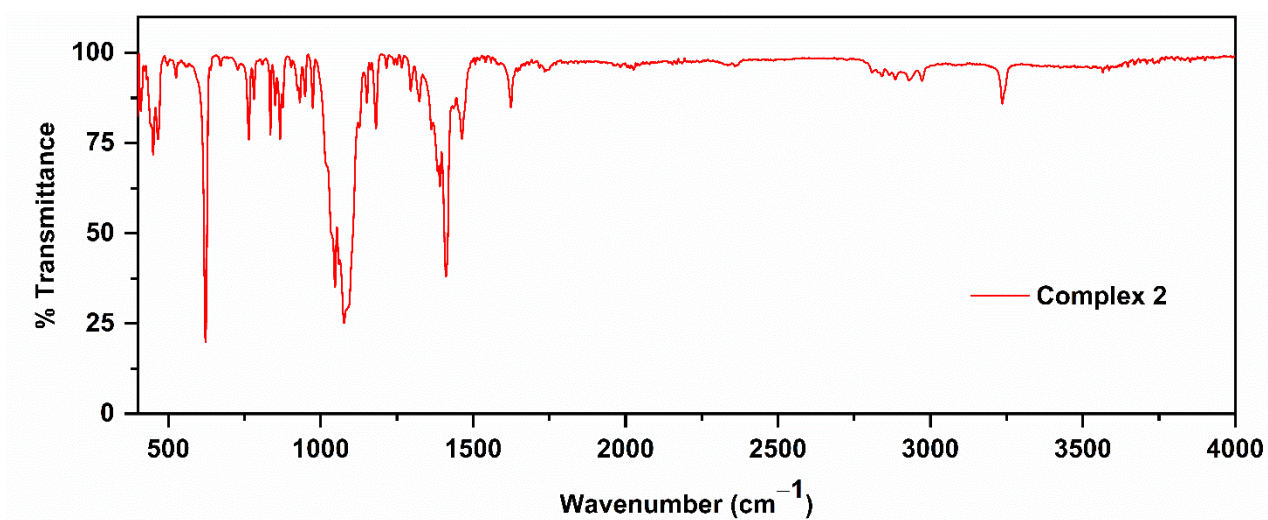

Fig. S10. FT-IR spectrum of complex 2.

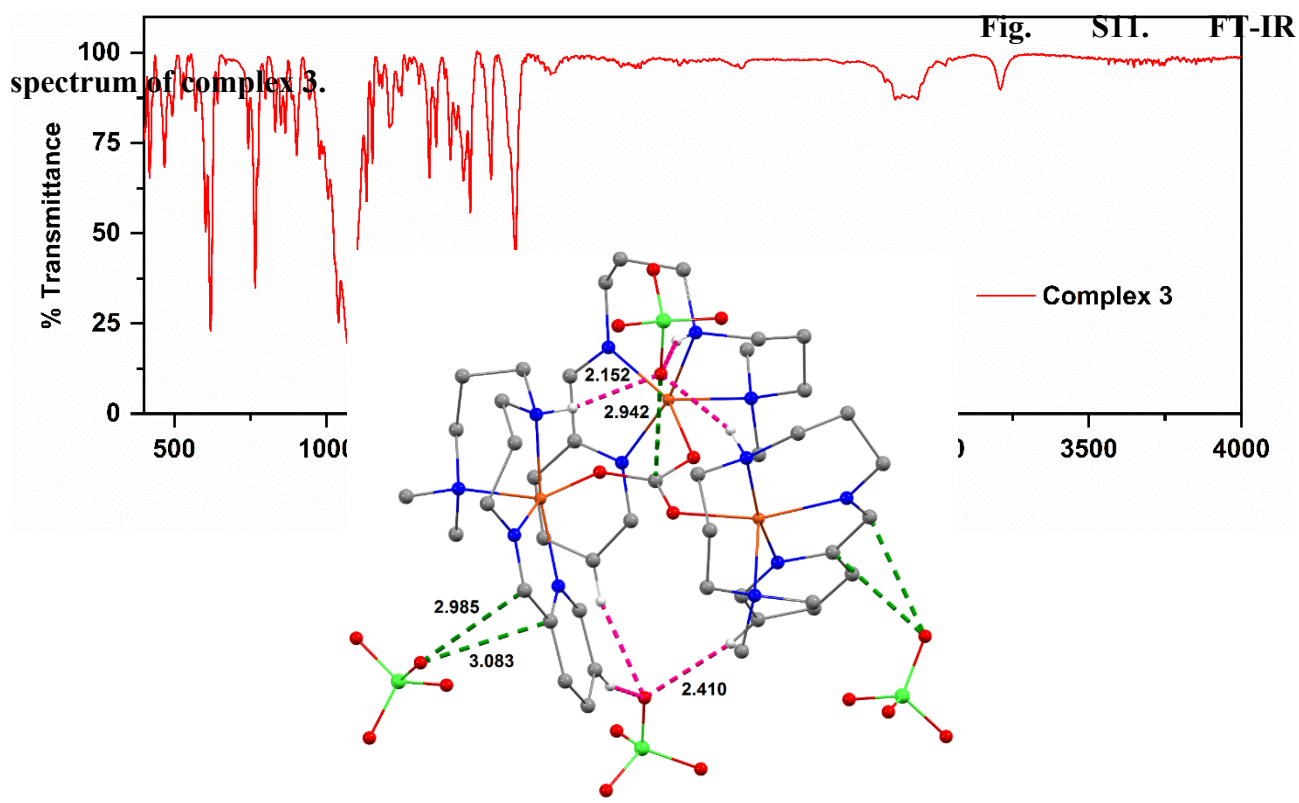

Fig. S11. FT-IR

spectrum of complex 3.

Fig.. S12. A part of the packing of complex **1** showing hydrogen bonding and anion- $\pi$  interactions

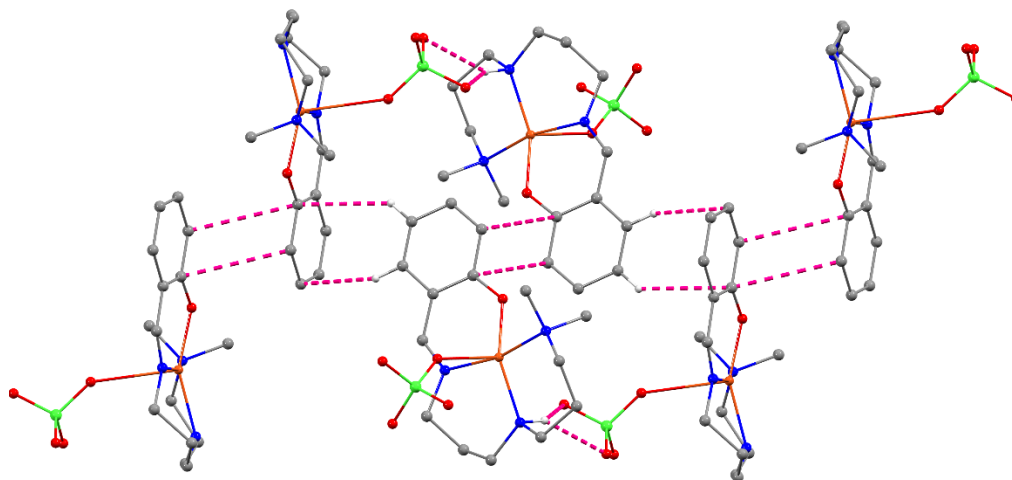

Fig.. S13. A part of crystal packing of **3** showing hydrogen bonding, C-H $\cdots\pi$  and  $\pi$ - $\pi$  stacking interactions

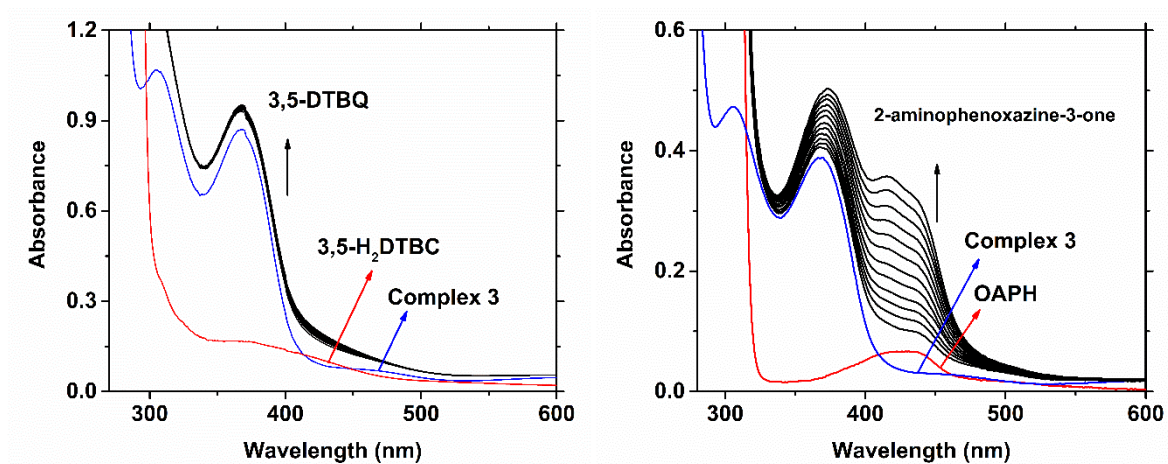

Fig. S14. Time resolved spectral profiles for the oxidation of substrates modelling function of CAO and PHS catalysed by complex **3** in air-saturated methanol.

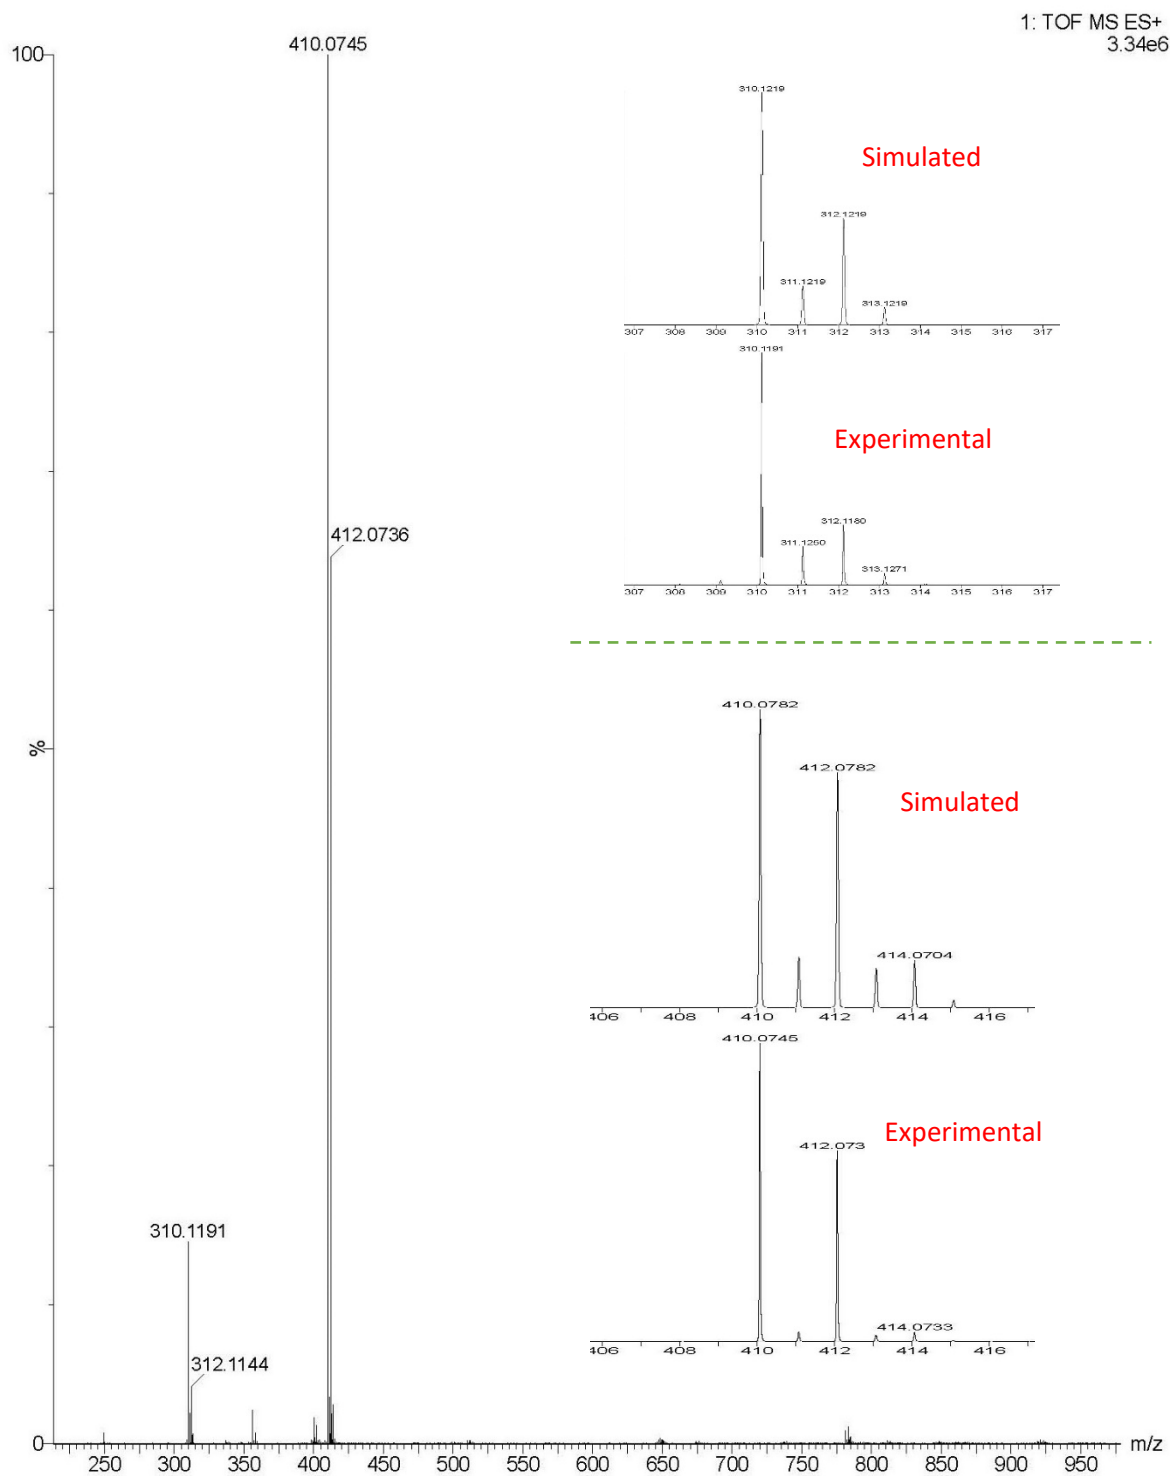

**Fig. S15.** HR-MS data of complex **1** in methanol showing  $m/z = 410.0745$  for species  $[\text{Cu}^{\text{II}}(\text{L}^1)(\text{ClO}_4)]^+$  (calculated  $m/z = 410.0782$ ) and  $m/z = 310.1191$  for species  $[\text{Cu}^{\text{II}}(\text{L}^1)\text{-H}]^+$  (calculated  $m/z = 310.1210$ ).

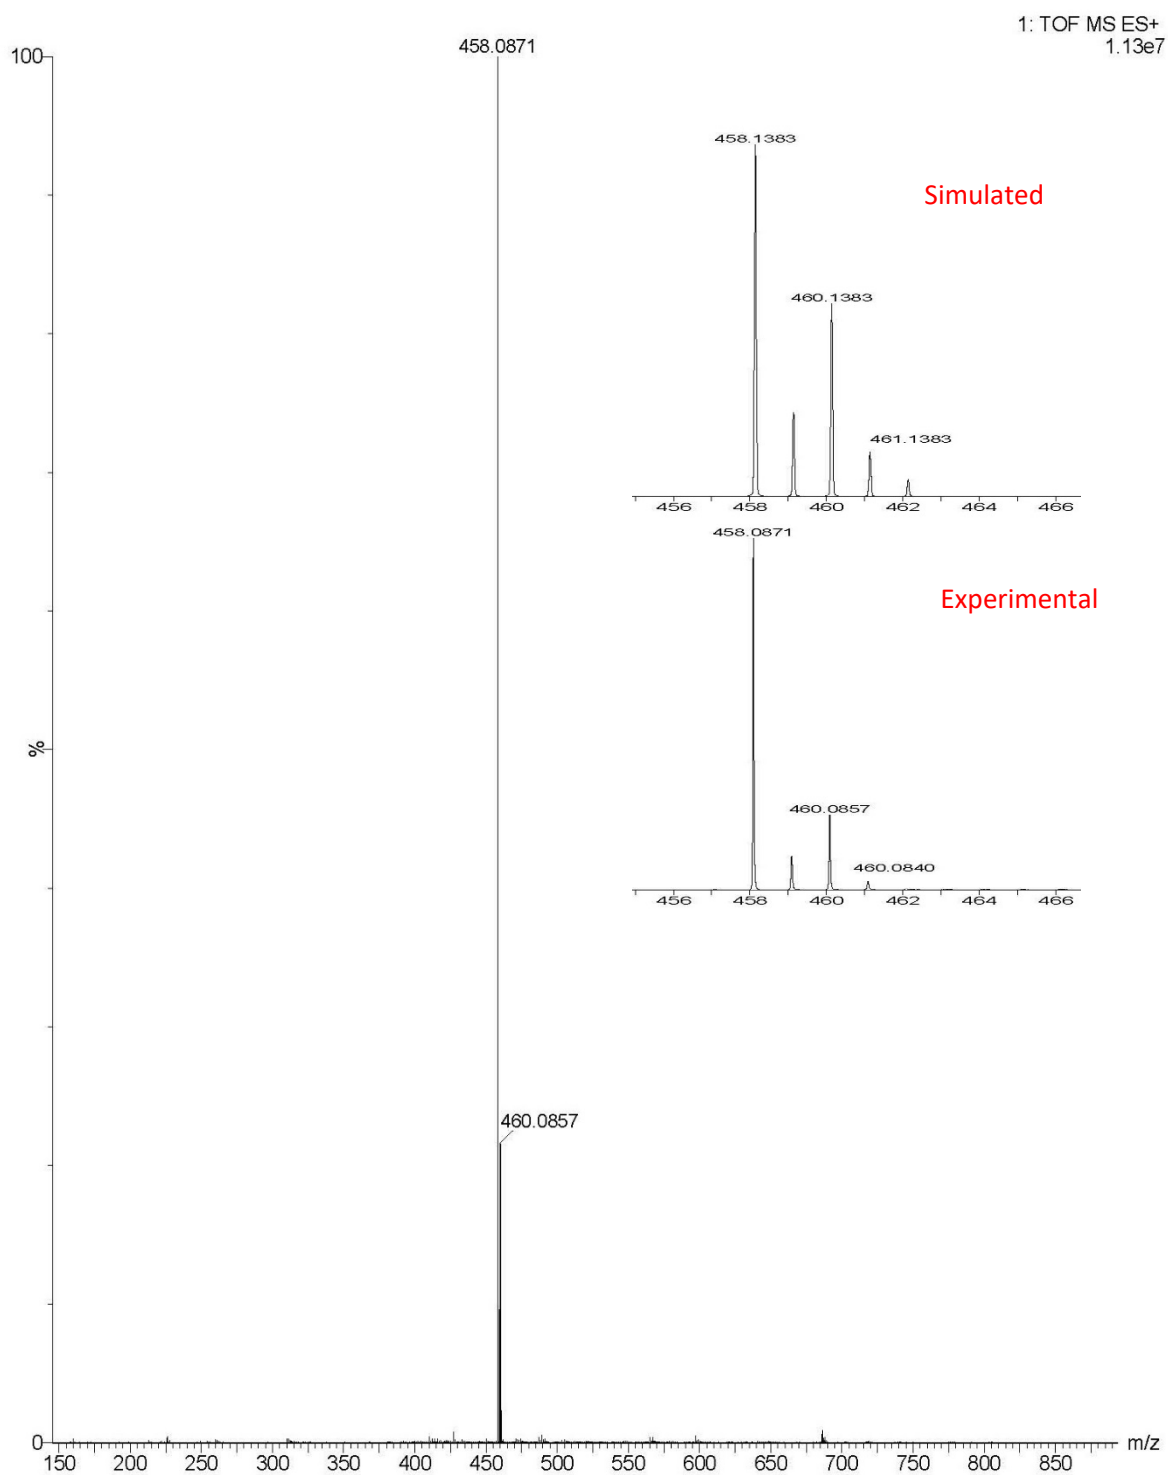

**Fig. S16.** HR-MS data of complex **1** in presence of *o*-aminophenol in methanol showing  $m/z = 458.0871$  for complex-substrate intermediate species  $[\text{KCu}(\text{L}^1)(\text{OAP})]^+$  (calculated  $m/z = 458.1363$ ).

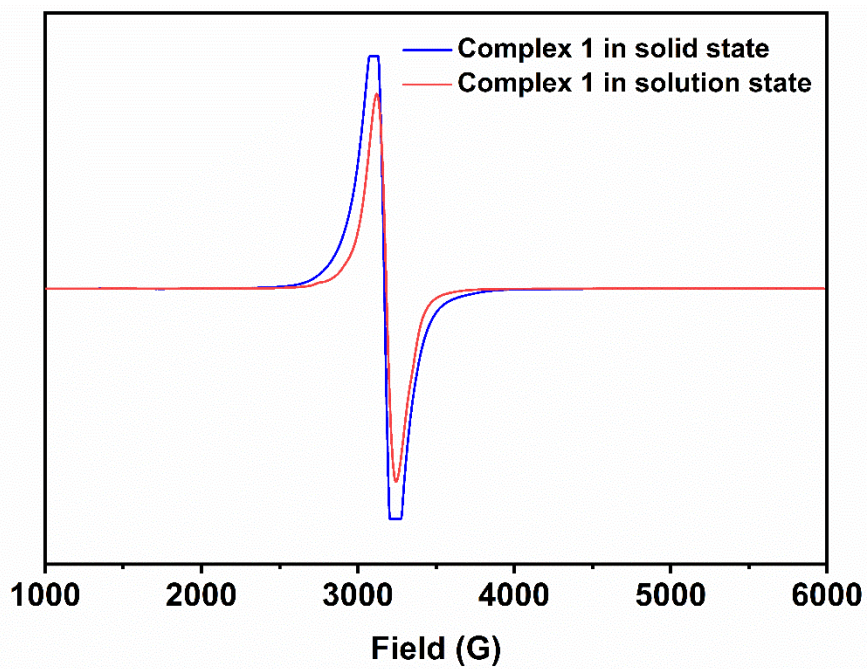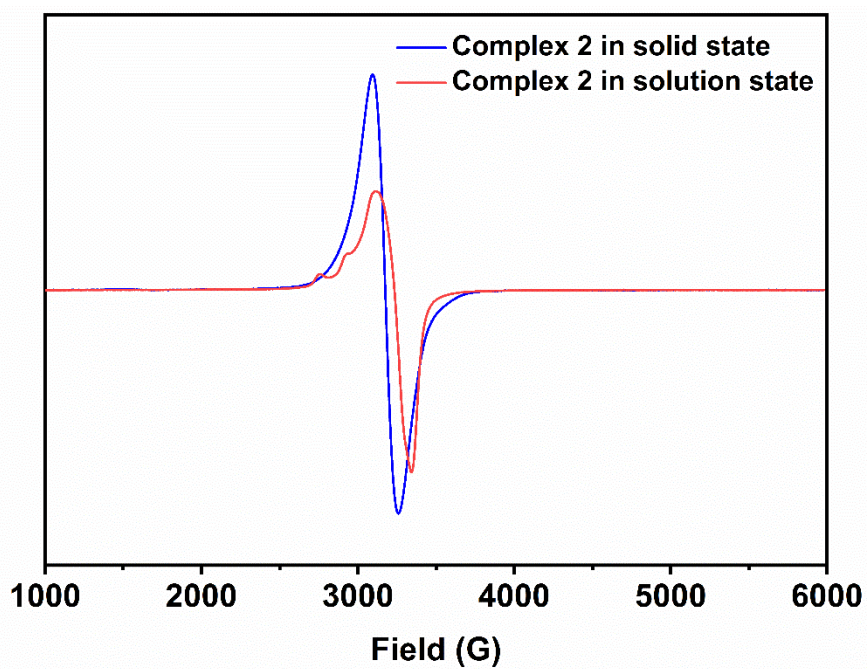

**Fig. S17.** EPR spectra of complex 1 and 2 in both solid and solution state as well. (frequency = 9.44 GHz; modulation = 1.0 mT; power = 0.841 mW).

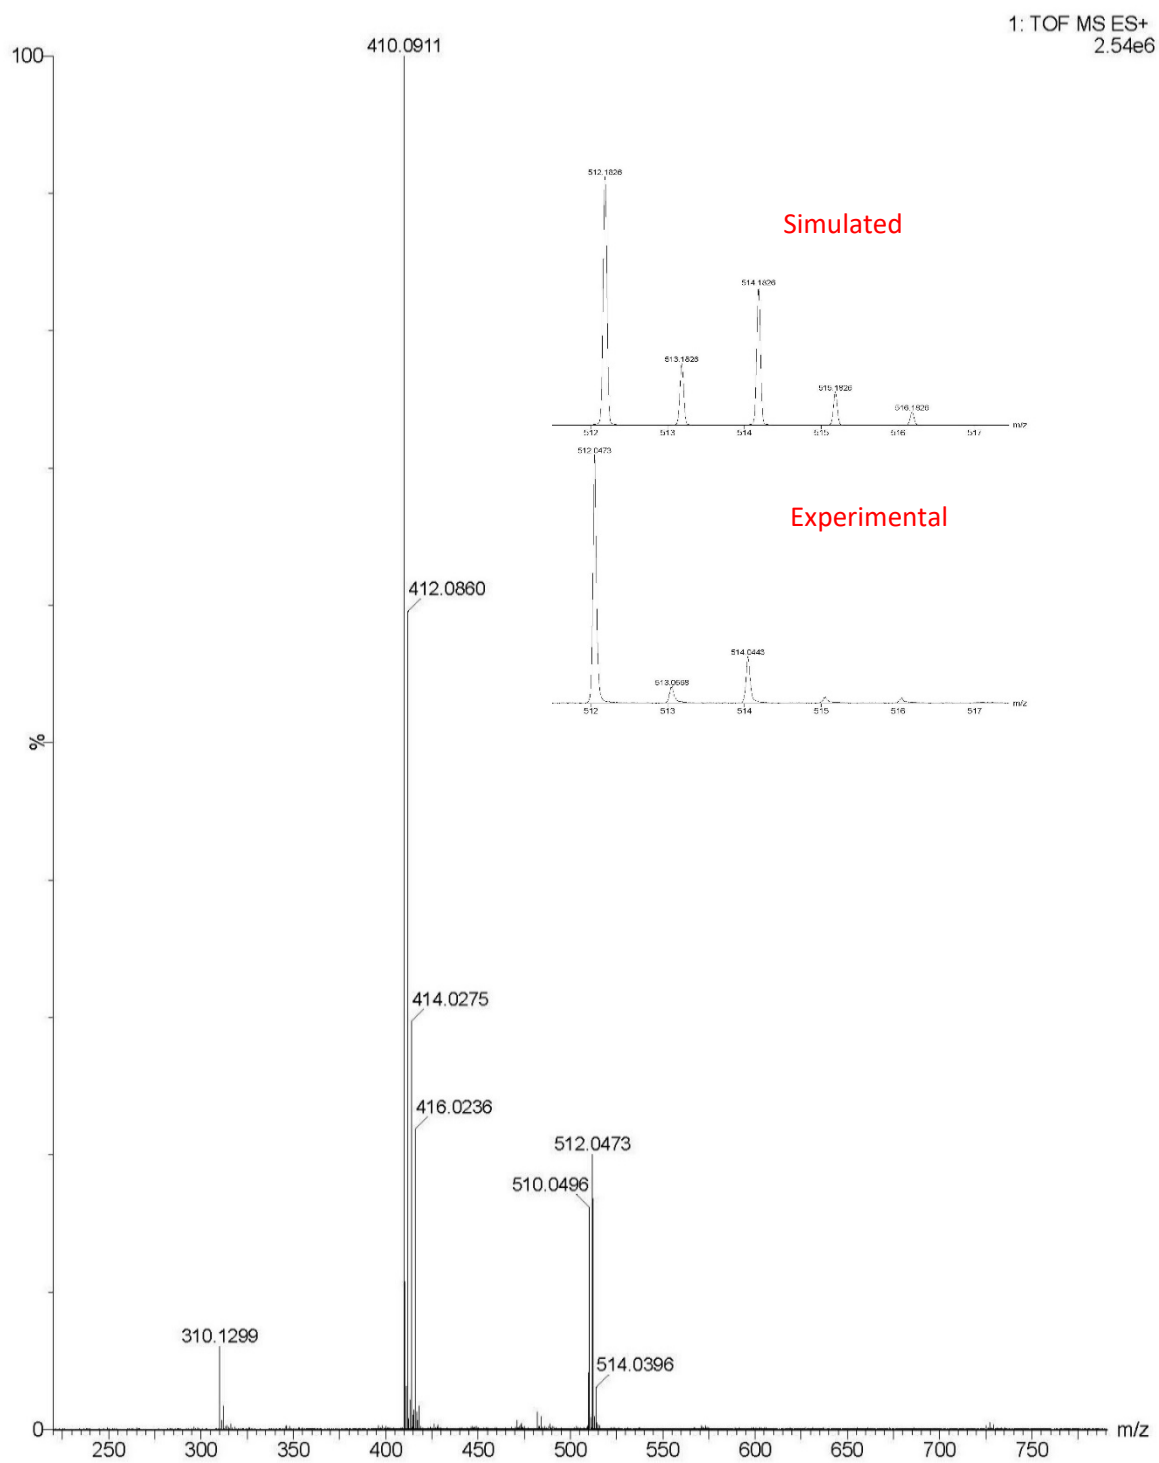

**Fig. S18.** HR-MS data of complex **1** in presence of benzyl alcohol in methanol.

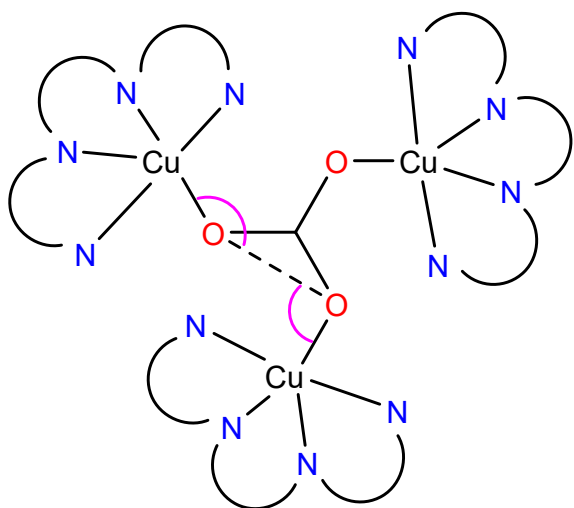

**Scheme S1.** Bond angles those are important for magneto-structural correlation.

### Crystal structure description of dinuclear carbonato-bridged complex (2-I)

Complex **2-I** crystallized in the monoclinic crystal system having  $P2_1/n$  space group and the asymmetric unit consists of a dinuclear  $[\text{Cu}_2(\text{L}^2)_2(\mu_2\text{-CO}_3)]^{2+}$  complex cation, two perchlorate counter anions and a lattice methanol molecule. Each metal centre in the complex cation is coordinated by four donor nitrogen atoms of the Schiff base ligand, and one oxygen atom of the carbonate group, which connects the metal centres in *anti-anti*  $\mu_2$  bridging mode. Although, both the metal centres construct  $\text{CuN}_4\text{O}$  coordination spheres with square pyramidal geometry, they experience different degree of distraction from the ideal geometry as suggested by  $\tau$  values of 0.24 and 0.00 for CuA and CuB, respectively. In both cases, the axial sites are occupied by tertiary amine nitrogen atom with bond distances 2.252(4) and 2.247(4) Å, which are significantly larger than the basal bond distances spanning in the range 2.027(4) to 2.040(3) Å. Therefore, it is a basal–basal bridging system through the *anti-anti*  $\mu_2$  bridging carbonate with the intra-dimer Cu...Cu separation of 5.309(1) Å and the shortest inter-dimer metal–metal separation of 8.583(1) Å. The coordination spheres may alternatively be described as a distorted octahedron when taking into account the semi-coordinative CuA–O1 and CuB–O1 separations of 2.603(3) and 2.898(3) Å, respectively, but the acute O–Cu–O bite angles (50.45 and 56.30°) seem to exclude the existence of interaction. The lattice methanol molecule is involved in hydrogen bonding interaction with O1 atom of the carbonate group with O100...O1 separation of 2.702(7) Å.

**Table S1.** Crystal details and structure refinement parameters of complexes **1–3** and **2-I**.

|                                                             | <b>1</b>                                                                                        | <b>2</b>                                                                                        | <b>3</b>                                                            | <b>2-I</b>                                                                                      |
|-------------------------------------------------------------|-------------------------------------------------------------------------------------------------|-------------------------------------------------------------------------------------------------|---------------------------------------------------------------------|-------------------------------------------------------------------------------------------------|
| Empirical formula                                           | C <sub>43</sub> H <sub>72</sub> Cl <sub>4</sub> Cu <sub>3</sub> N <sub>12</sub> O <sub>19</sub> | C <sub>43</sub> H <sub>75</sub> Cl <sub>4</sub> Cu <sub>3</sub> N <sub>15</sub> O <sub>19</sub> | C <sub>15</sub> H <sub>24</sub> CuClN <sub>3</sub> O <sub>5</sub>   | C <sub>30</sub> H <sub>54</sub> N <sub>10</sub> O <sub>12</sub> Cl <sub>2</sub> Cu <sub>2</sub> |
| Temperature (K)                                             | 150(2)                                                                                          | 273.15                                                                                          | 150(2)                                                              | 150.15                                                                                          |
| Formula weight (g mol <sup>-1</sup> )                       | 1393.54                                                                                         | 1438.60                                                                                         | 425.36                                                              | 944.81                                                                                          |
| Crystal system                                              | Cubic                                                                                           | Cubic                                                                                           | Monoclinic                                                          | Monoclinic                                                                                      |
| Space group                                                 | <i>P</i> 2 <sub>1</sub> 3                                                                       | <i>P</i> 2 <sub>1</sub> 3                                                                       | <i>P</i> 2 <sub>1</sub> / <i>c</i>                                  | <i>P</i> 2 <sub>1</sub> / <i>n</i>                                                              |
| <i>a</i> (Å)                                                | 17.8987(7)                                                                                      | 18.3268(3)                                                                                      | 16.134(2)                                                           | 12.1603(10)                                                                                     |
| <i>b</i> (Å)                                                | 17.8987(7)                                                                                      | 18.3268(3)                                                                                      | 8.0576(12)                                                          | 14.4352(12)                                                                                     |
| <i>c</i> (Å)                                                | 17.8987(7)                                                                                      | 18.3268(3)                                                                                      | 14.526(2)                                                           | 23.543(2)                                                                                       |
| $\alpha$ (deg)                                              | 90                                                                                              | 90                                                                                              | 90.00                                                               | 90.00                                                                                           |
| $\beta$ (deg)                                               | 90                                                                                              | 90                                                                                              | 108.949(5)                                                          | 103.676(3)                                                                                      |
| $\gamma$ (deg)                                              | 90                                                                                              | 90                                                                                              | 90.00                                                               | 90.00                                                                                           |
| volume (Å <sup>3</sup> )                                    | 5734.1(7)                                                                                       | 6155.5(3)                                                                                       | 1786.0(4)                                                           | 4015.5(6)                                                                                       |
| Z                                                           | 4                                                                                               | 4                                                                                               | 4                                                                   | 4                                                                                               |
| <i>D</i> <sub>calc</sub> (g cm <sup>-3</sup> )              | 1.614                                                                                           | 1.552                                                                                           | 1.582                                                               | 1.563                                                                                           |
| $\mu$ (mm <sup>-1</sup> )                                   | 1.370                                                                                           | 1.280                                                                                           | 1.404                                                               | 1.263                                                                                           |
| <i>F</i> (000)                                              | 2884                                                                                            | 2980                                                                                            | 884                                                                 | 1968.0                                                                                          |
| $\theta$ Range (deg)                                        | 2.276–27.171                                                                                    | 3.335–31.835                                                                                    | 2.829–25.242                                                        | 1.688–26.393                                                                                    |
| Reflections collected                                       | 158178                                                                                          | 26464                                                                                           | 64147                                                               | 46611                                                                                           |
| Independent reflections ( <i>R</i> <sub>int</sub> )         | 4250(0.0669)                                                                                    | 5816 (0.0634)                                                                                   | 5545(0.0281)                                                        | 8224 (0.0583)                                                                                   |
| Observed reflections [ <i>I</i> >2 $\sigma$ ( <i>I</i> )]   | 4050                                                                                            | 5816                                                                                            | 5545                                                                | 8224                                                                                            |
| Restraints/parameters                                       | 0/250                                                                                           | 0/272                                                                                           | 0/242                                                               | 2/521                                                                                           |
| Goodness-of-fit on <i>F</i> <sup>2</sup>                    | 1.056                                                                                           | 1.051                                                                                           | 1.061                                                               | 1.067                                                                                           |
| Final <i>R</i> indices [ <i>I</i> >2 $\sigma$ ( <i>I</i> )] | <i>R</i> <sub>1</sub> = 0.0294,<br>w <i>R</i> <sub>2</sub> = 0.0737                             | <i>R</i> <sub>1</sub> = 0.0403,<br>w <i>R</i> <sub>2</sub> = 0.0881                             | <i>R</i> <sub>1</sub> = 0.0431,<br>w <i>R</i> <sub>2</sub> = 0.1092 | <i>R</i> <sub>1</sub> = 0.0537,<br>w <i>R</i> <sub>2</sub> = 0.1236                             |
| <i>R</i> indices (all data)                                 | <i>R</i> <sub>1</sub> = 0.0325,<br>w <i>R</i> <sub>2</sub> = 0.0755                             | <i>R</i> <sub>1</sub> = 0.0632,<br>w <i>R</i> <sub>2</sub> = 0.0967                             | <i>R</i> <sub>1</sub> = 0.0502,<br>w <i>R</i> <sub>2</sub> = 0.1137 | <i>R</i> <sub>1</sub> = 0.0908,<br>w <i>R</i> <sub>2</sub> = 0.1389                             |
| Largest diff. peak/hole (e Å <sup>-3</sup> )                | 1.462/–0.492                                                                                    | 0.38/–0.28                                                                                      | 1.552/–0.867                                                        | 1.16/–0.71                                                                                      |

**Table S2.** Selected bond angles for complexes **1–3**.

|          | <b>1</b>   | <b>2</b>   | <b>2-I</b>  |            |             |            |
|----------|------------|------------|-------------|------------|-------------|------------|
|          |            |            | CuA         |            | CuB         |            |
| O1 Cu N1 | 92.33(11)  | 93.19(16)  | O2 CuA N1A  | 88.92(13)  | O3 CuB N4B  | 93.05(9)   |
| O1 Cu N2 | 154.43(11) | 155.35(16) | O2 CuA N4A  | 90.02(14)  | O3 CuB N3B  | 162.76(14) |
| O1 Cu N3 | 89.34(12)  | 87.35(16)  | N1A CuA N4A | 168.45(15) | N4B CuB N3B | 96.02(11)  |
| O1 Cu N4 | 98.86(11)  | 98.73(17)  | O2 CuA N3A  | 154.05(13) | O3 CuB N1B  | 87.99(14)  |
| N1 Cu N2 | 79.52(13)  | 80.06(18)  | N1A CuA N3A | 79.60(14)  | N4B CuB N1B | 162.89(11) |
| N1 Cu N3 | 166.39(13) | 169.45(18) | N4A CuA N3A | 96.62(15)  | N3B CuB N1B | 79.08(15)  |
| N1 Cu N4 | 99.59(12)  | 96.57(18)  | O2 CuA N5A  | 100.02(12) | O3 CuB N5B  | 93.82(14)  |
| N2 Cu N3 | 93.26(13)  | 95.11(18)  | N1A CuA N5A | 98.07(14)  | N4B CuB N5B | 96.08(12)  |
| N2 Cu N4 | 106.35(12) | 105.56(18) | N4A CuA N5A | 93.44(15)  | N3B CuB N5B | 99.74(15)  |
| N3 Cu N4 | 93.49(12)  | 93.75(18)  | N3A CuA N5A | 104.56(13) | N1B CuB N5B | 100.90(16) |
| C1 O1 Cu | 120.79(15) | 125.6(2)   | C1 O2 CuA   | 105.1(3)   | C1 O3 CuB   | 115.9(3)   |
| <b>3</b> |            |            |             |            |             |            |
| O1 Cu N1 | 90.62(7)   |            |             |            |             |            |
| O1 Cu N2 | 153.36(9)  |            |             |            |             |            |
| N1 Cu N2 | 97.13(9)   |            |             |            |             |            |
| O1 Cu N3 | 82.68(7)   |            |             |            |             |            |
| N1 Cu N3 | 165.82(8)  |            |             |            |             |            |
| N2 Cu N3 | 94.39(9)   |            |             |            |             |            |



**Table S3.** Magneto-structural data for syn-anti carbonato bridged trinuclear copper(II) complexes<sup>a</sup>

| Compound                                                                                                                                                      | $J$ (cm <sup>-1</sup> ) <sup>b</sup> | Cu–O (Å) <sup>c</sup> | (Cu <sub>1</sub> OO) (°) | (Cu <sub>2</sub> OO) (°) | Ref.      |
|---------------------------------------------------------------------------------------------------------------------------------------------------------------|--------------------------------------|-----------------------|--------------------------|--------------------------|-----------|
| [Cu <sub>3</sub> (L <sup>4</sup> ) <sub>3</sub> (μ <sub>3</sub> -CO <sub>3</sub> )(ClO <sub>4</sub> ) <sub>3</sub> ](ClO <sub>4</sub> )                       | 48                                   | 1.97                  | 78.6                     | 231.3                    | S1        |
| [Cu <sub>3</sub> (dmbpy) <sub>3</sub> (μ <sub>3</sub> -CO <sub>3</sub> )](BF <sub>4</sub> ) <sub>4</sub>                                                      | 29.3                                 | 1.98                  | 77–96.3                  | 204.5–220.9              | S2        |
| [Cu <sub>3</sub> (MePEA) <sub>3</sub> (μ <sub>3</sub> -CO <sub>3</sub> )(ClO <sub>4</sub> ) <sub>3</sub> ](ClO <sub>4</sub> )                                 | 18.0                                 | 1.97                  | 81.0                     | 219.0                    | S3        |
| [Cu <sub>3</sub> (L <sup>5</sup> ) <sub>3</sub> (μ <sub>3</sub> -CO <sub>3</sub> )](ClO <sub>4</sub> ) <sub>4</sub>                                           | 17.2                                 | 2.00                  | 82.1                     | 217.9                    | S4        |
| [Cu <sub>3</sub> (Medpt) <sub>3</sub> (μ <sub>3</sub> -CO <sub>3</sub> )(ClO <sub>4</sub> ) <sub>3</sub> ](ClO <sub>4</sub> )                                 | 12.6                                 | 1.97                  | 88.7                     | 211.7                    | S5        |
| [Cu <sub>3</sub> (dpt) <sub>3</sub> (μ <sub>3</sub> -CO <sub>3</sub> )(ClO <sub>4</sub> ) <sub>2</sub> (H <sub>2</sub> O)](ClO <sub>4</sub> )                 | 12.6                                 | 1.99                  | 87.0–110.4               | 199.0–213.3              | S6        |
| [Cu <sub>3</sub> (L <sup>6</sup> ) <sub>3</sub> (μ <sub>3</sub> -CO <sub>3</sub> )](ClO <sub>4</sub> ) <sub>4</sub>                                           | 11.3                                 | 1.98                  | 87.8                     | 212.2                    | S7        |
| [Cu <sub>3</sub> (bpy) <sub>6</sub> (μ <sub>3</sub> -CO <sub>3</sub> )](BF <sub>4</sub> ) <sub>4</sub>                                                        | 10.6                                 | 2.02                  | 78.5–88.4                | 212.7–223.5              | S8        |
| [Cu <sub>3</sub> (L <sup>7</sup> ) <sub>3</sub> (μ <sub>3</sub> -CO <sub>3</sub> )(H <sub>2</sub> O) <sub>3</sub> ](NO <sub>3</sub> ) <sub>4</sub>            | 8.2                                  | 1.93                  | 97.2                     | 204.3                    | S9        |
| [Cu <sub>3</sub> (apy) <sub>6</sub> (μ <sub>3</sub> -CO <sub>3</sub> ) <sub>2</sub> ] <sub>2n</sub> (ClO <sub>4</sub> ) <sub>2n</sub> ·0.5nCH <sub>3</sub> OH | 6.2                                  | 1.95                  | 77.6                     | 222.4                    | S10       |
| [Cu <sub>3</sub> (L <sup>8</sup> )(μ <sub>3</sub> -CO <sub>3</sub> )](ClO <sub>4</sub> ) <sub>4</sub> ·H <sub>2</sub> O                                       | 4.0                                  | 1.90                  | 91.3–94.7                | 205.1–208.6              | S11       |
| [Cu <sub>3</sub> (dmMePEA) <sub>3</sub> (μ <sub>3</sub> -CO <sub>3</sub> )(ClO <sub>4</sub> ) <sub>3</sub> ](ClO <sub>4</sub> )                               | 9.9<br>–8.8                          | 1.97                  | 78.2                     | 221.8                    | S12       |
| [Cu <sub>3</sub> (bpy) <sub>6</sub> (μ <sub>3</sub> -CO <sub>3</sub> )](B <sub>12</sub> H <sub>12</sub> ) <sub>2</sub> ·4.5DMF·2H <sub>2</sub> O              | 9.8<br>–8.2                          | 2.06                  | 76.6–81.8                | 218.5–223.8              | S13       |
| [Cu <sub>3</sub> (L <sup>1</sup> ) <sub>3</sub> (μ <sub>3</sub> -CO <sub>3</sub> )](ClO <sub>4</sub> ) <sub>3</sub> ( <b>1</b> )                              | 14.8                                 | 1.98                  | 91.0                     | 209.7                    | This work |
| [Cu <sub>3</sub> (L <sup>2</sup> ) <sub>3</sub> (μ <sub>3</sub> -CO <sub>3</sub> )](ClO <sub>4</sub> ) <sub>3</sub> ( <b>2</b> )                              | 8.6                                  | 1.98                  | 96.5                     | 206.1                    | This work |

<sup>a</sup> Ligand abbreviation: L<sup>4</sup> = (2-pyridylethyl){2-(1-methylimidazolyl)methyl}methylamine, dmbpy = 4,4'-dimethyl-2,2'-bipyridine, MePEA = methyl(2-(2-pyridyl)ethyl)-(2-pyridylmethyl)amine, L<sup>5</sup> = 1,4,7,10-tetra-azabicyclo(5.5.3)-pentadecane, Medpt = bis(3-aminopropyl)methylamine, dpt = bis(3-aminopropyl)amine, L<sup>6</sup> = N-(2-thiophenoethyl)-N,N-bis(3-aminopropyl)amine, bpy = 2,2'-bipyridine, L<sup>7</sup> = 1,4-dioxo-7,10,13-triazacyclopentadecane, apy = 4-aminopyridine, L<sup>8</sup> = a 2,4,6-triethylbenzene-capped hexamine macrobicyclic with pyridyl spacers, dmMePEA = N-methyl(2-(2-pyridyl)ethyl)-(4-methoxy-3,5-dimethyl-2-pyridylmethyl)amine; b = tabulated following  $H = -2JS_1 \cdot S_2$  type convention; c = Average distance.

**Table S4.** The reaction Gibbs energies for OAPH oxidation calculated with PBE0/def2TZVP/D4/CPCM(methanol) for species based on compounds **1-2**

| Reactions for <b>1</b> <sup>a</sup>                                                                                                                                     | D <sub>r</sub> G (kcal/mol) |
|-------------------------------------------------------------------------------------------------------------------------------------------------------------------------|-----------------------------|
| $[\text{Cu}^{\text{II}}(\text{L}^1)(\text{H}_2\text{O})]^{2+} + \text{OAPH} = [\text{Cu}^{\text{II}}(\text{HL}^1)(\text{OAP})]^{2+} + \text{H}_2\text{O}$               | 0.557                       |
| $[\text{Cu}^{\text{II}}(\text{HL}^1)(\text{OAP})]^{2+} + \text{OH}^- = [\text{Cu}^{\text{I}}(\text{HL}^1)(\text{BQMI}^{\bullet})]^{1+} + \text{H}_2\text{O}$            | -22.668                     |
| $[\text{Cu}^{\text{I}}(\text{HL}^1)(\text{BQMI}^{\bullet})]^{1+} + \text{O}_2 = [\text{Cu}^{\text{II}}(\text{HL}^1)(\text{BQMI}^{\bullet})(\text{O}_2^{\bullet})]^{1+}$ | 2.156                       |
| $[\text{Cu}^{\text{II}}(\text{HL}^1)(\text{BQMI}^{\bullet})(\text{O}_2^{\bullet})]^{1+} = [\text{Cu}^{\text{II}}(\text{L}^1)(\text{OOH})]^{1+} + \text{BQMI}$           | -6.581                      |
| $[\text{Cu}^{\text{II}}(\text{L}^1)(\text{OOH})]^{1+} + \text{H}_3\text{O}^+ = [\text{Cu}^{\text{II}}(\text{L}^1)(\text{H}_2\text{O})]^{2+} + \text{H}_2\text{O}_2$     | -29.230                     |
| Reactions for <b>2</b> <sup>a</sup>                                                                                                                                     |                             |
| $[\text{Cu}^{\text{II}}(\text{L}^2)(\text{H}_2\text{O})]^{2+} + \text{OAPH} = [\text{Cu}^{\text{II}}(\text{HL}^2)(\text{OAP})]^{2+} + \text{H}_2\text{O}$               | 0.231                       |
| $[\text{Cu}^{\text{II}}(\text{HL}^2)(\text{OAP})]^{2+} + \text{OH}^- = [\text{Cu}^{\text{I}}(\text{HL}^2)(\text{BQMI}^{\bullet})]^{1+} + \text{H}_2\text{O}$            | -25.698                     |
| $[\text{Cu}^{\text{I}}(\text{HL}^2)(\text{BQMI}^{\bullet})]^{1+} + \text{O}_2 = [\text{Cu}^{\text{II}}(\text{HL}^2)(\text{BQMI}^{\bullet})(\text{O}_2^{\bullet})]^{1+}$ | 4.174                       |
| $[\text{Cu}^{\text{II}}(\text{HL}^2)(\text{BQMI}^{\bullet})(\text{O}_2^{\bullet})]^{1+} = [\text{Cu}^{\text{II}}(\text{L}^2)(\text{OOH})]^{1+} + \text{BQMI}$           | -6.355                      |
| $[\text{Cu}^{\text{II}}(\text{L}^2)(\text{OOH})]^{1+} + \text{H}_3\text{O}^+ = [\text{Cu}^{\text{II}}(\text{L}^2)(\text{H}_2\text{O})]^{2+} + \text{H}_2\text{O}_2$     | -28.118                     |

<sup>a</sup> OAPH = *o*-aminophenol, OAP<sup>-</sup> = *o*-aminophenolate anion, BQMI = *o*-iminobenzoquinone, BQMI<sup>•</sup> = *o*-iminobenzoquinone radical anion.

Selected molecular structures of intermediate complexes of **1** overlaid with the spin density distribution:

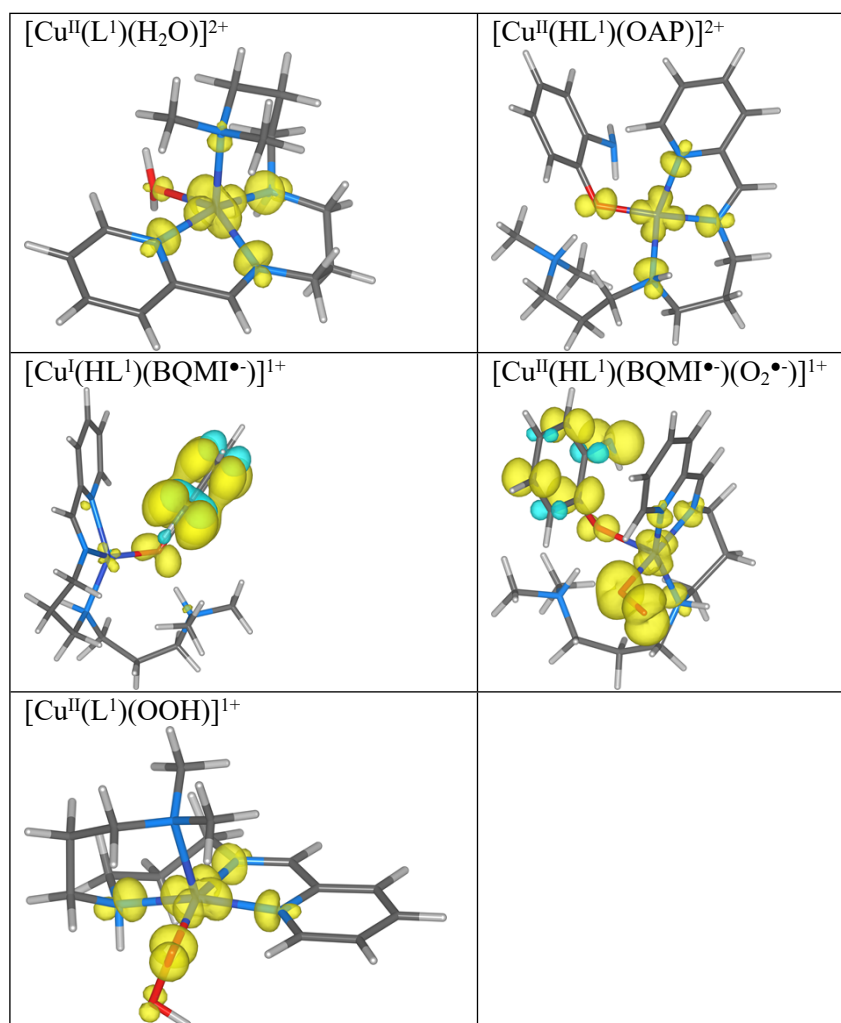

**Table S5.** The reaction Gibbs energies for benzyl alcohol oxidation calculated with PBE0/def2-TZVP/D4/CPCM (acetonitrile) for species based on compounds **1-2**

| Reactions for <b>1</b> <sup>a</sup>                                                                                                                                                                      | D <sub>r</sub> G (kcal/mol) |
|----------------------------------------------------------------------------------------------------------------------------------------------------------------------------------------------------------|-----------------------------|
| $[\text{Cu}^{\text{II}}(\text{L}^1)(\text{H}_2\text{O})]^{2+} + \text{PhCH}_2\text{OH} = [\text{Cu}^{\text{II}}(\text{HL}^1)(\text{PhCH}_2\text{O})]^{2+} + \text{H}_2\text{O}$                          | -0.002                      |
| $[\text{Cu}^{\text{II}}(\text{HL}^1)(\text{PhCH}_2\text{O})]^{2+} + \text{TEMPO} = [\text{Cu}^{\text{II}}(\text{HL}^1)(\text{PhCHO}\bullet)]^{2+} + \text{TEMPO-H}$                                      | 17.195                      |
| $[\text{Cu}^{\text{II}}(\text{HL}^1)(\text{PhCHO}\bullet)]^{2+} = [\text{Cu}^{\text{I}}(\text{HL}^1)(\text{PhCHO})]^{2+}$                                                                                | -19.672                     |
| $[\text{Cu}^{\text{I}}(\text{HL}^1)(\text{PhCHO})]^{2+} + \text{O}_2 = [\text{Cu}^{\text{II}}(\text{L}^1)(\text{OOH})]^{2+} + \text{PhCHO}$                                                              | 8.128                       |
| $[\text{Cu}^{\text{II}}(\text{L}^1)(\text{OOH})]^{2+} + \text{TEMPO-H} + \text{H}_2\text{O} = [\text{Cu}^{\text{II}}(\text{L}^1)(\text{H}_2\text{O})]^{2+} + \text{TEMPO} + \text{H}_2\text{O}_2$        | -23.242                     |
| Reactions for <b>2</b> <sup>a</sup>                                                                                                                                                                      |                             |
| $[\text{Cu}^{\text{II}}(\text{L}^2)(\text{H}_2\text{O})]^{2+} + \text{PhCH}_2\text{OH} = [\text{Cu}^{\text{II}}(\text{HL}^2)(\text{PhCH}_2\text{O})]^{2+} + \text{H}_2\text{O}$                          | -0.033                      |
| $[\text{Cu}^{\text{II}}(\text{HL}^2)(\text{PhCH}_2\text{O})]^{2+} + \text{TEMPO} = [\text{Cu}^{\text{II}}(\text{HL}^2)(\text{PhCHO}\bullet)]^{2+} + \text{TEMPO-H}$                                      | 17.506                      |
| $[\text{Cu}^{\text{II}}(\text{HL}^2)(\text{PhCHO}\bullet)]^{2+} = [\text{Cu}^{\text{I}}(\text{HL}^2)(\text{PhCHO})]^{2+}$                                                                                | -22.491                     |
| $[\text{Cu}^{\text{I}}(\text{HL}^2)(\text{PhCHO})]^{2+} + \text{O}_2 = [\text{Cu}^{\text{II}}(\text{L}^2)(\text{OOH}\bullet)]^{2+} + \text{PhCHO}$                                                       | 10.985                      |
| $[\text{Cu}^{\text{II}}(\text{L}^2)(\text{OOH}\bullet)]^{2+} + \text{TEMPO-H} + \text{H}_2\text{O} = [\text{Cu}^{\text{II}}(\text{L}^2)(\text{H}_2\text{O})]^{2+} + \text{TEMPO} + \text{H}_2\text{O}_2$ | -23.561                     |

<sup>a</sup>PhCH<sub>2</sub>OH = benzyl alcohol, TEMPO = 2,2,6,6-tetramethylpiperidine-1-oxyl, TEMPO-H = 1-hydroxy-2,2,6,6-tetramethylpiperidine.

Selected molecular structures of intermediate complexes of **1** overlaid with the spin density distribution:

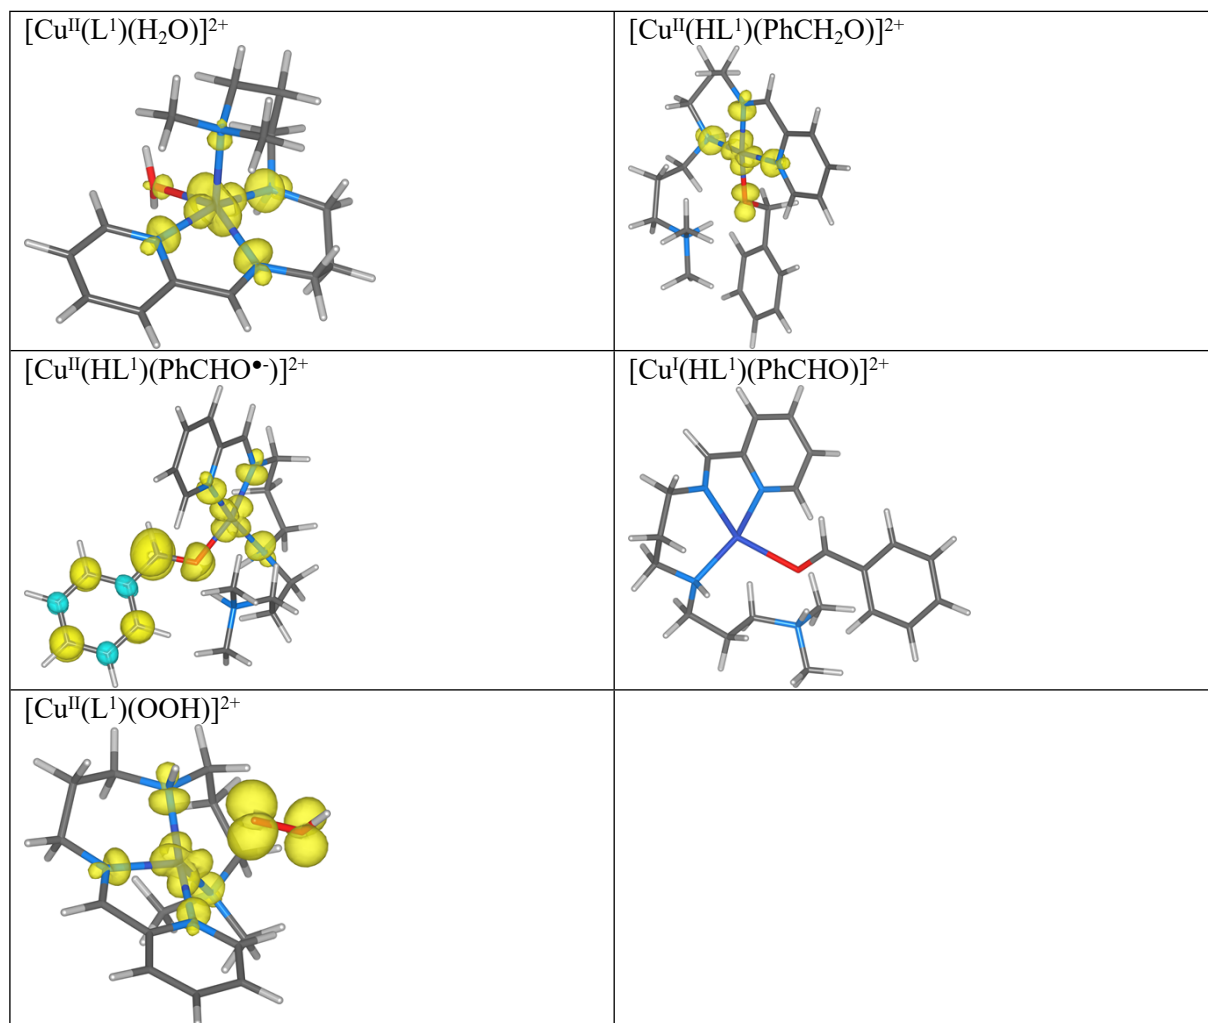

Selected molecular structures of intermediate complexes of **2** overlaid with the spin density distribution:

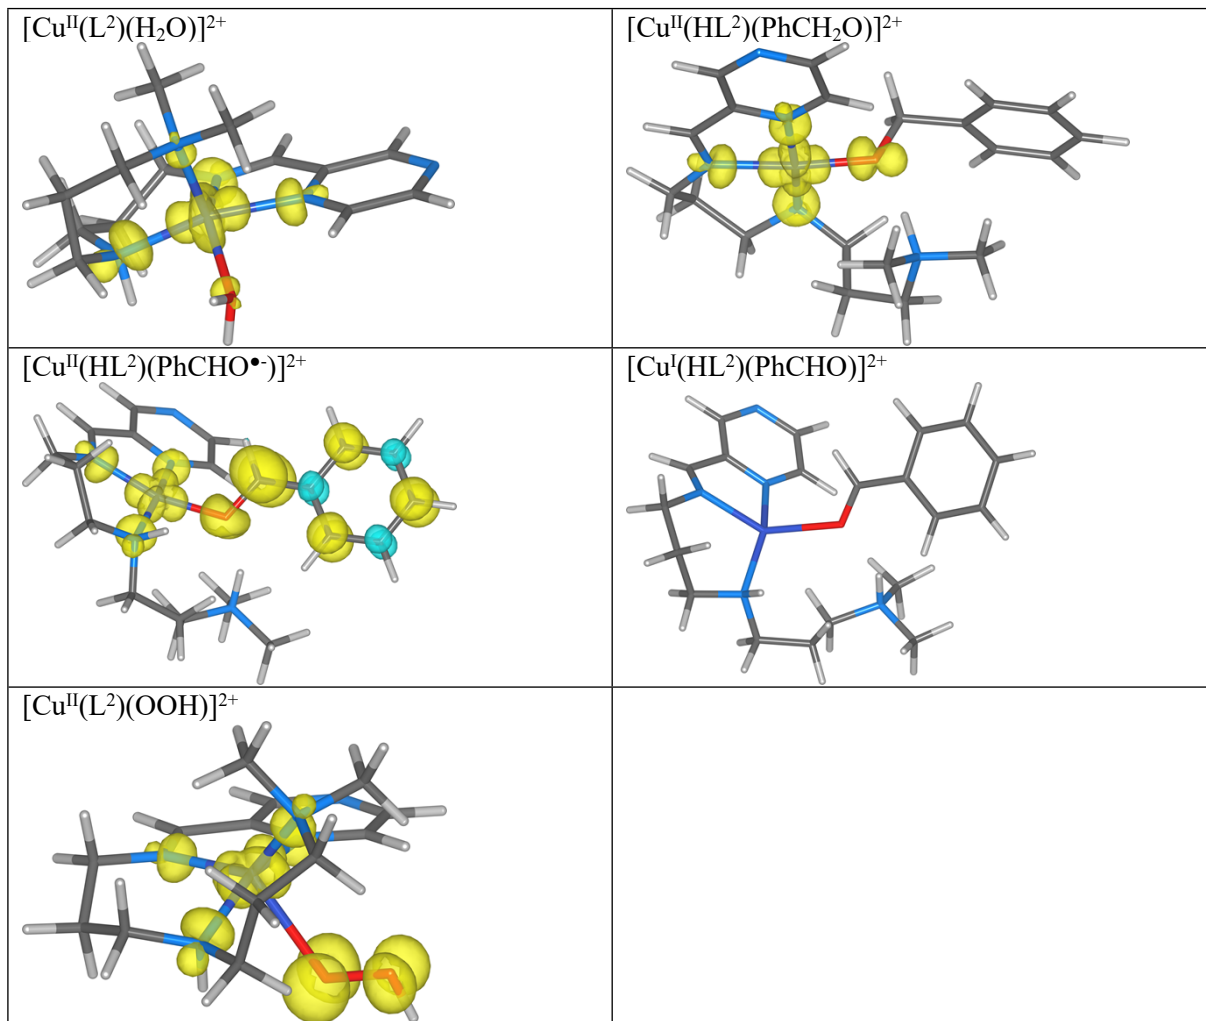

## NMR data of the products:

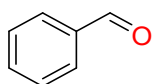

**benzaldehyde (P):** Isolated as colourless liquid (50 mg, 96%).  $^1\text{H}$  NMR (400 MHz,  $\text{CDCl}_3$ )  $\delta$  10.01 (s, 1H), 7.92 – 7.84 (m, 2H), 7.67 – 7.57 (m, 1H), 7.52 (t,  $J = 7.5$  Hz, 2H).  $^{13}\text{C}$  NMR (101 MHz,  $\text{CDCl}_3$ )  $\delta$  192.50, 136.49, 134.56, 129.83, 129.09.

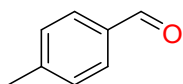

**4-methylbenzaldehyde (P<sub>1</sub>):** Isolated as white solid (56 mg, 95%).  $^1\text{H}$  NMR (400 MHz,  $\text{CDCl}_3$ )  $\delta$  9.97 (s, 1H), 7.79 (d,  $J = 8.1$  Hz, 2H), 7.34 (d,  $J = 7.9$  Hz, 2H), 2.45 (s, 3H).  $^{13}\text{C}$  NMR (101 MHz,  $\text{CDCl}_3$ )  $\delta$  191.99, 145.52, 134.18, 129.75, 21.85.

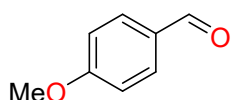

**4-methoxybenzaldehyde (P<sub>2</sub>):** Isolated as white solid (65 mg, 96%).  $^1\text{H}$  NMR (400 MHz,  $\text{CDCl}_3$ )  $\delta$  9.90 (s, 1H), 7.86 (d,  $J = 8.6$  Hz, 2H), 7.02 (d,  $J = 8.6$  Hz, 2H), 3.91 (s, 3H).  $^{13}\text{C}$  NMR (101 MHz,  $\text{CDCl}_3$ )  $\delta$  190.03, 163.79, 131.18, 129.13, 113.52, 54.85.

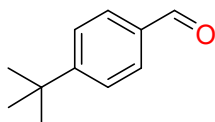

**4-(tert-butyl)benzaldehyde (P<sub>3</sub>):** Isolated as white solid (80 mg, 99%).  $^1\text{H}$  NMR (700 MHz,  $\text{CDCl}_3$ )  $\delta$  10.09 (s, 1H), 7.93 (d,  $J = 7.3$  Hz, 2H), 7.67 (d,  $J = 7.3$  Hz, 2H), 1.47 (s, 9H).  $^{13}\text{C}$  NMR (176 MHz,  $\text{CDCl}_3$ )  $\delta$  189.96, 156.29, 131.95, 127.61, 123.88, 33.17, 28.98.

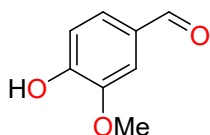

**4-hydroxy-3-methoxybenzaldehyde (P<sub>4</sub>):** Isolated as white solid (75 mg, 99%).  $^1\text{H}$  NMR (400 MHz,  $\text{CDCl}_3$ )  $\delta$  9.80 (s, 1H), 7.41 (d,  $J = 5.4$  Hz, 2H), 7.02 (d,  $J = 8.3$  Hz, 1H), 6.62 (s, 1H), 3.92 (s, 3H).  $^{13}\text{C}$  NMR (101 MHz,  $\text{CDCl}_3$ )  $\delta$  190.96, 151.73, 147.16, 129.59, 127.41, 114.46, 108.81, 55.96.

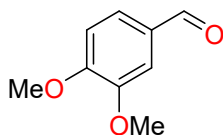

**Veratraldehyde (P<sub>5</sub>):** Isolated as white solid (82 mg, 99%).  $^1\text{H}$  NMR (400 MHz,  $\text{CDCl}_3$ )  $\delta$  9.94 (s, 1H), 7.68 – 7.40 (m, 2H), 7.07 (d,  $J = 7.8$  Hz, 1H), 4.05 (s, 3H), 4.03 (s, 3H).  $^{13}\text{C}$  NMR (101 MHz,  $\text{CDCl}_3$ )  $\delta$  188.91, 152.42, 147.55, 128.08, 124.89, 108.46, 106.90, 54.34, 54.08.

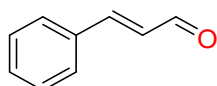

**cinnamaldehyde (P<sub>6</sub>):** Isolated as white solid (62 mg, 97%). <sup>1</sup>H NMR (700 MHz, CDCl<sub>3</sub>) δ 9.71 (d, *J* = 7.7 Hz, 1H), 7.57 (dd, *J* = 7.0 Hz, 2H), 7.48 (d, *J* = 15.9 Hz, 1H), 7.44 (t, *J* = 8.7 Hz, 3H), 6.72 (dd, *J* = 15.9 Hz, 1H). <sup>13</sup>C NMR (176 MHz, CDCl<sub>3</sub>) δ 193.87, 152.95, 134.14, 131.41, 129.24, 128.68.

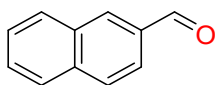

**2-naphthaldehyde (P<sub>7</sub>):** Isolated as white solid (61 mg, 79%). <sup>1</sup>H NMR (400 MHz, CDCl<sub>3</sub>) δ 10.16 (s, 1H), 8.33 (s, 1H), 8.02 – 7.88 (m, 4H), 7.67 – 7.56 (m, 2H). <sup>13</sup>C NMR (101 MHz, CDCl<sub>3</sub>) δ 192.29, 136.47, 134.58, 134.13, 132.66, 129.55, 129.13, 128.10, 127.11, 122.78.

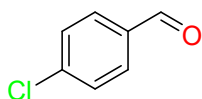

**4-chlorobenzaldehyde (P<sub>8</sub>):** Isolated as white solid (54 mg, 77%). <sup>1</sup>H NMR (400 MHz, CDCl<sub>3</sub>) δ 9.98 (s, 1H), 7.92 – 7.76 (m, 2H), 7.51 (d, *J* = 8.4 Hz, 2H). <sup>13</sup>C NMR (101 MHz, CDCl<sub>3</sub>) δ 190.86, 140.94, 134.71, 130.90, 129.46.

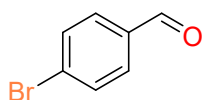

**4-bromobenzaldehyde (P<sub>9</sub>):** Isolated as white solid (66 mg, 72%). <sup>1</sup>H NMR (700 MHz, CDCl<sub>3</sub>) δ 9.99 (s, 1H), 7.76 (d, *J* = 8.4 Hz, 2H), 7.70 (d, *J* = 8.3 Hz, 2H). <sup>13</sup>C NMR (176 MHz, CDCl<sub>3</sub>) δ 190.83, 134.82, 132.20, 130.73, 129.52.

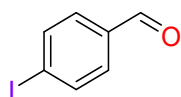

**4-iodobenzaldehyde (P<sub>10</sub>):** Isolated as white solid (85 mg, 74%). <sup>1</sup>H NMR (700 MHz, CDCl<sub>3</sub>) δ 9.94 (s, 1H), 7.89 (d, *J* = 8.3 Hz, 2H), 7.57 (d, *J* = 8.4 Hz, 2H). <sup>13</sup>C NMR (176 MHz, CDCl<sub>3</sub>) δ 191.49, 138.49, 135.65, 130.89, 102.93.

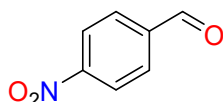

**4-nitrobenzaldehyde (P<sub>11</sub>):** Isolated as off-white solid (49 mg, 65% in 24h; 71 mg, 94% in 16h). <sup>1</sup>H NMR (400 MHz, CDCl<sub>3</sub>) δ 10.16 (s, 1H), 8.46 – 8.34 (m, 2H), 8.11 – 8.05 (m, 2H). <sup>13</sup>C NMR (101 MHz, CDCl<sub>3</sub>) δ 190.41, 140.17, 132.76, 130.60, 124.43.

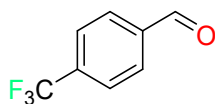

**4-(trifluoromethyl)benzaldehyde (P<sub>12</sub>):** Isolated as off-white solid (53 mg, 61% in 24h; 79 mg, 91% in 16h). <sup>1</sup>H NMR (400 MHz, CDCl<sub>3</sub>) δ 10.10 (s, 1H), 8.01 (d, *J* = 8.0 Hz, 2H), 7.81 (d, *J* = 8.0 Hz, 2H). <sup>13</sup>C NMR (101 MHz, CDCl<sub>3</sub>) δ 191.26, 130.73, 130.08, 126.28 (q, *J* = 3.7 Hz).

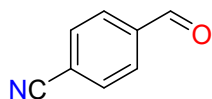

**4-formylbenzonitrile (P<sub>13</sub>):** Isolated as colourless liquid (36 mg, 55% in 10h; 61 mg, 93% in 24h). <sup>1</sup>H NMR (400 MHz, CDCl<sub>3</sub>) δ 10.09 (s, 1H), 7.99 (d, *J* = 8.0 Hz, 2H), 7.84 (d, *J* = 8.3 Hz, 2H). <sup>13</sup>C NMR (101 MHz, CDCl<sub>3</sub>) δ 190.75, 138.86, 133.02, 130.01, 117.78.

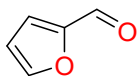

**furan-2-carbaldehyde (P<sub>14</sub>):** Isolated as colourless liquid solid (30 mg, 62%). <sup>1</sup>H NMR (400 MHz, CDCl<sub>3</sub>) δ 9.68 (s, 1H), 7.70 (s, 1H), 7.26 (d, *J* = 3.4 Hz, 1H), 6.62 (dd, *J* = 3.5 Hz, 1H). <sup>13</sup>C NMR (101 MHz, CDCl<sub>3</sub>) δ 178.06, 153.16, 148.22, 121.12, 112.73.

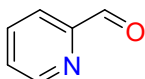

**picolinaldehyde (P<sub>15</sub>):** Isolated as colourless liquid (17 mg, 32%). <sup>1</sup>H NMR (400 MHz, CDCl<sub>3</sub>) δ 10.08 (s, 1H), 8.79 (d, *J* = 4.7 Hz, 1H), 7.96 (d, *J* = 7.8 Hz, 1H), 7.90 – 7.84 (m, 1H), 7.52 (m, 1H). <sup>13</sup>C NMR (101 MHz, CDCl<sub>3</sub>) δ 193.56, 152.94, 150.34, 137.22, 128.01, 121.85.

NMR spectra of the products:

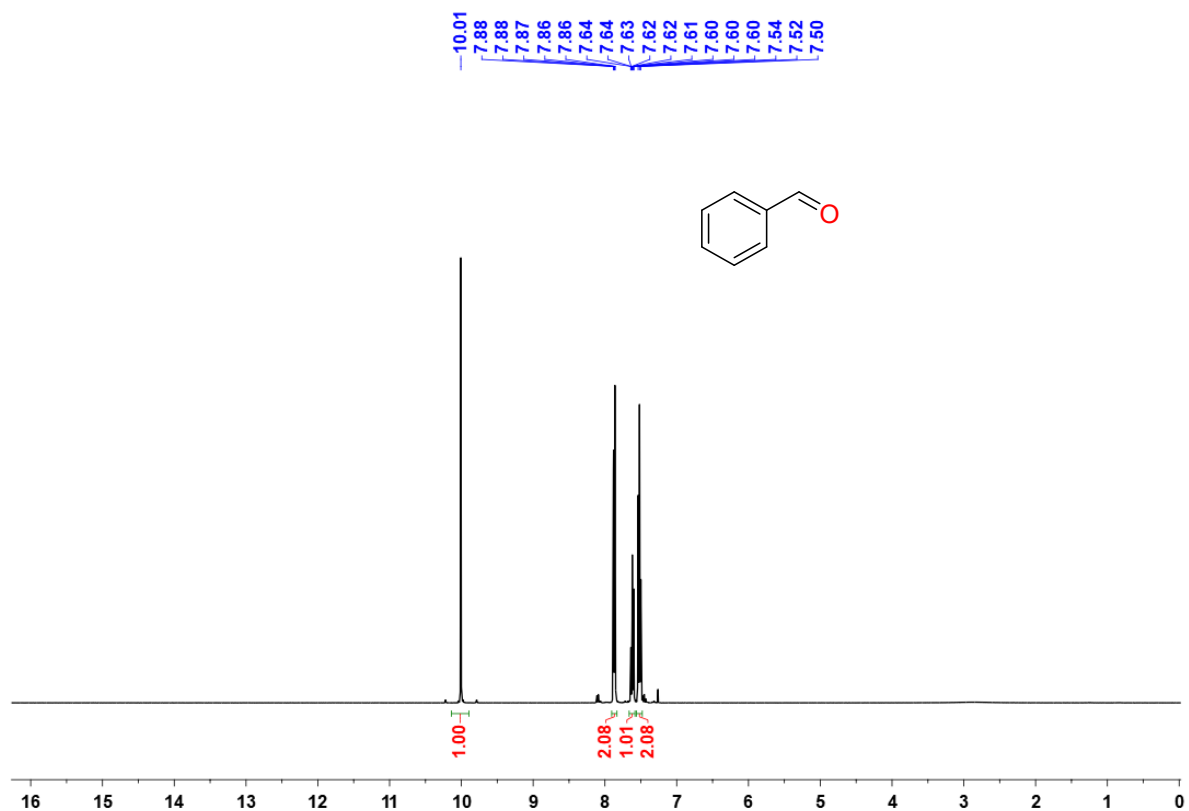

Fig. S19. <sup>1</sup>H NMR spectrum of catalytic product benzaldehyde (P) in CDCl<sub>3</sub> at r.t.

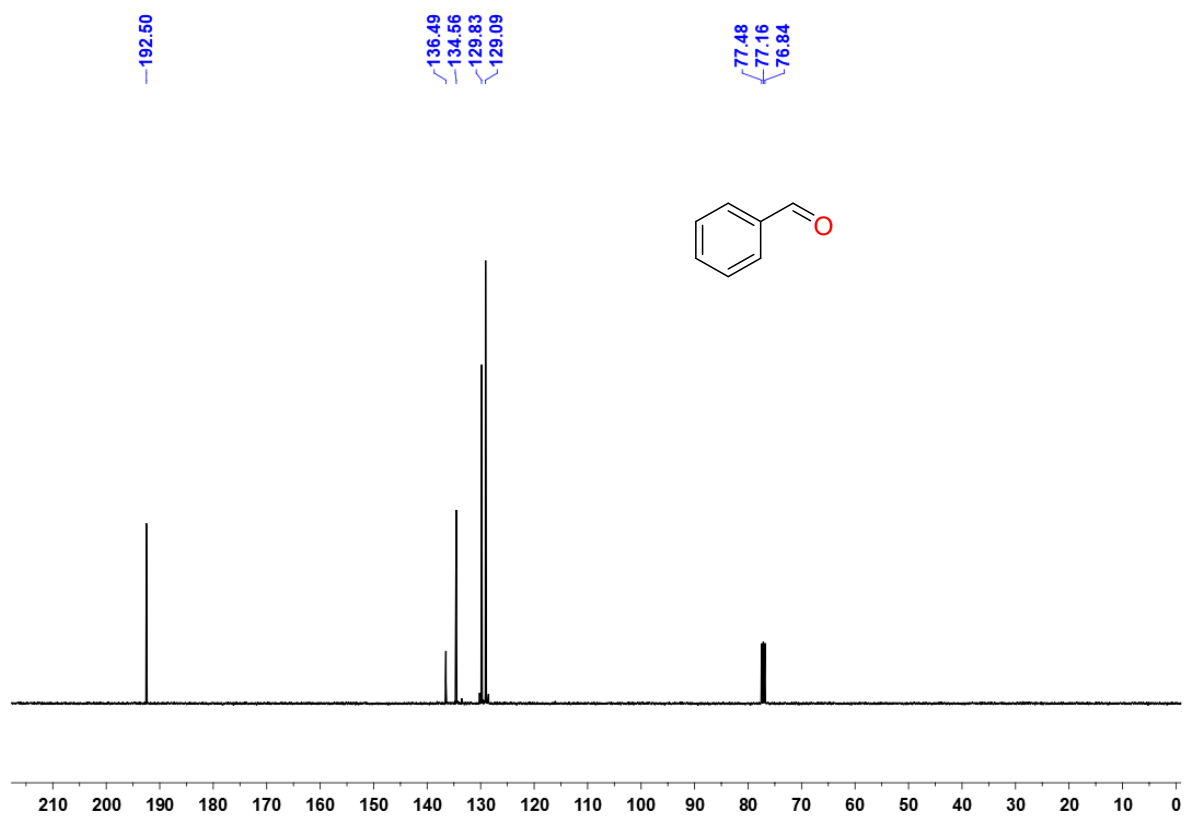

Fig. S20. <sup>13</sup>C{<sup>1</sup>H} NMR spectrum of catalytic product benzaldehyde (P) in CDCl<sub>3</sub> at r.t.



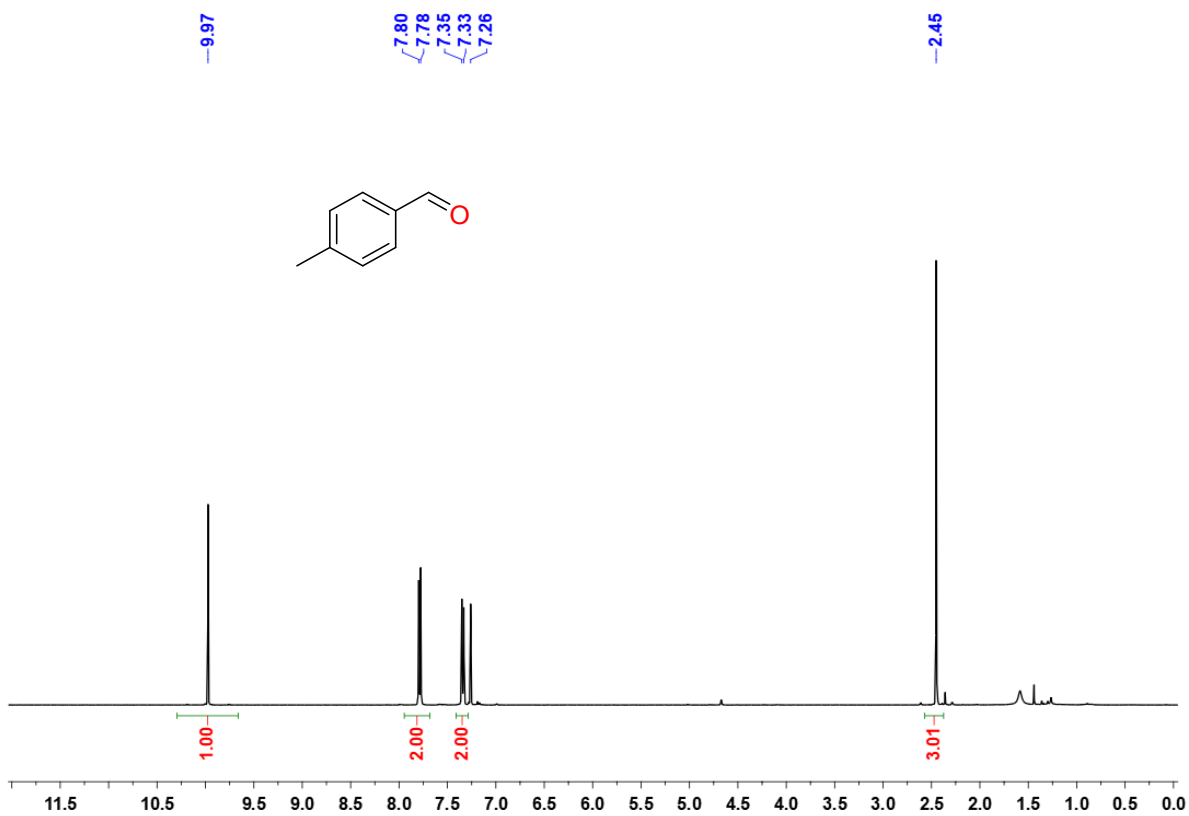

Fig. S21.  $^1\text{H}$  NMR spectrum of 4-methylbenzaldehyde ( $\text{P}_1$ ) in  $\text{CDCl}_3$  at r.t.

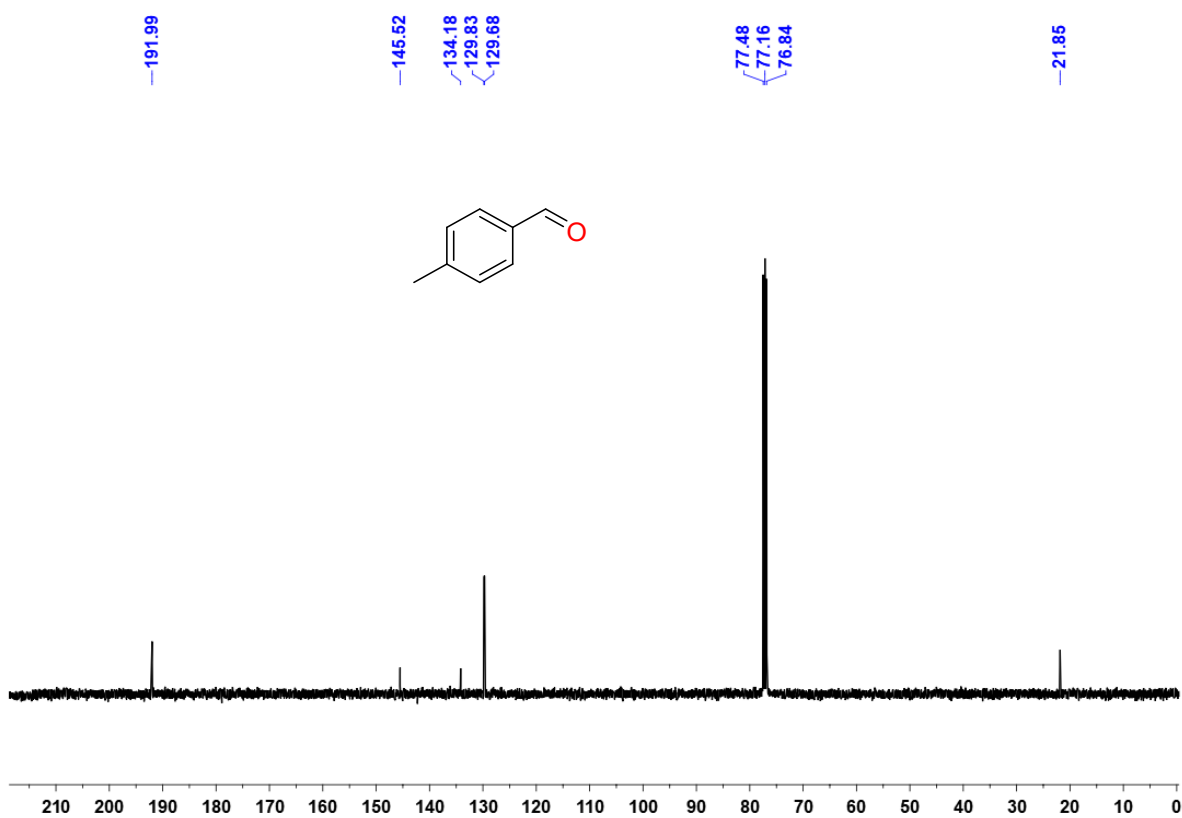

Fig. S22.  $^{13}\text{C}\{^1\text{H}\}$  NMR spectrum of 4-methylbenzaldehyde ( $\text{P}_1$ ) in  $\text{CDCl}_3$  at r.t.

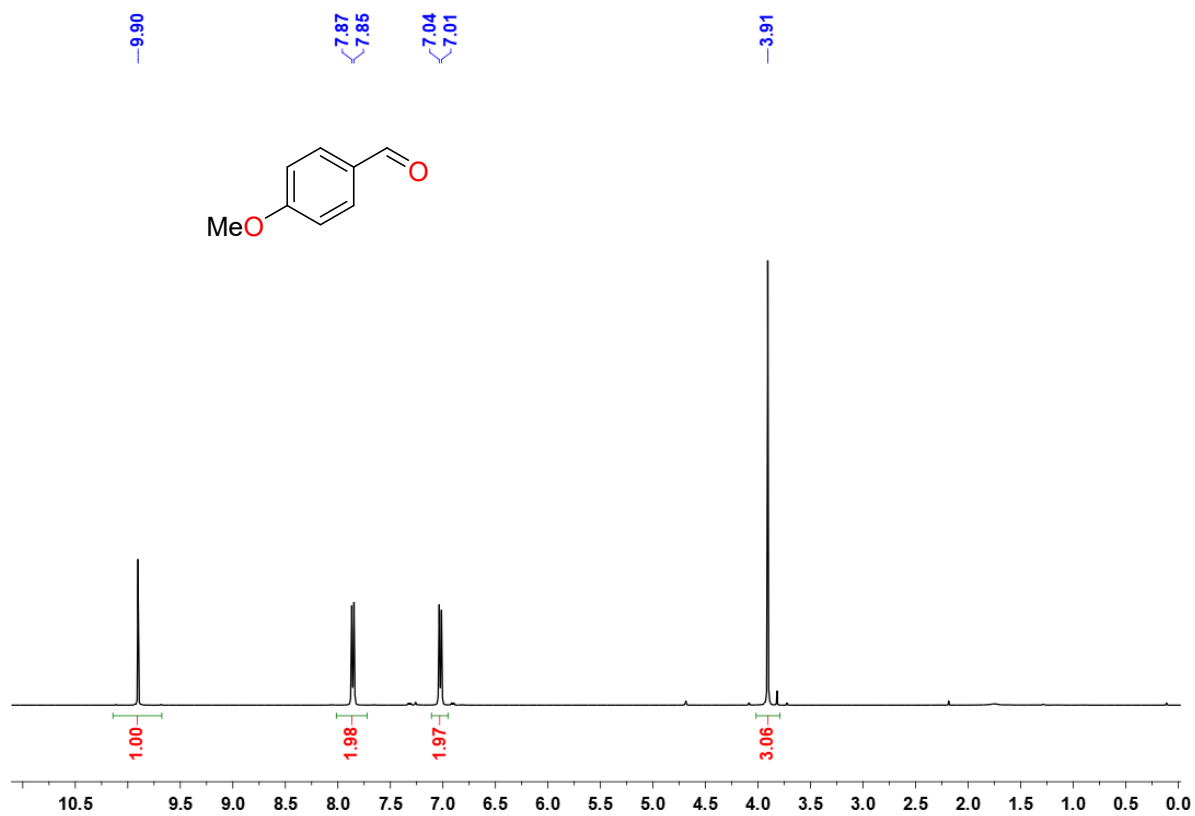

Fig. S23.  $^1\text{H}$  NMR spectrum of 4-methoxybenzaldehyde ( $\text{P}_2$ ) in  $\text{CDCl}_3$  at r.t.

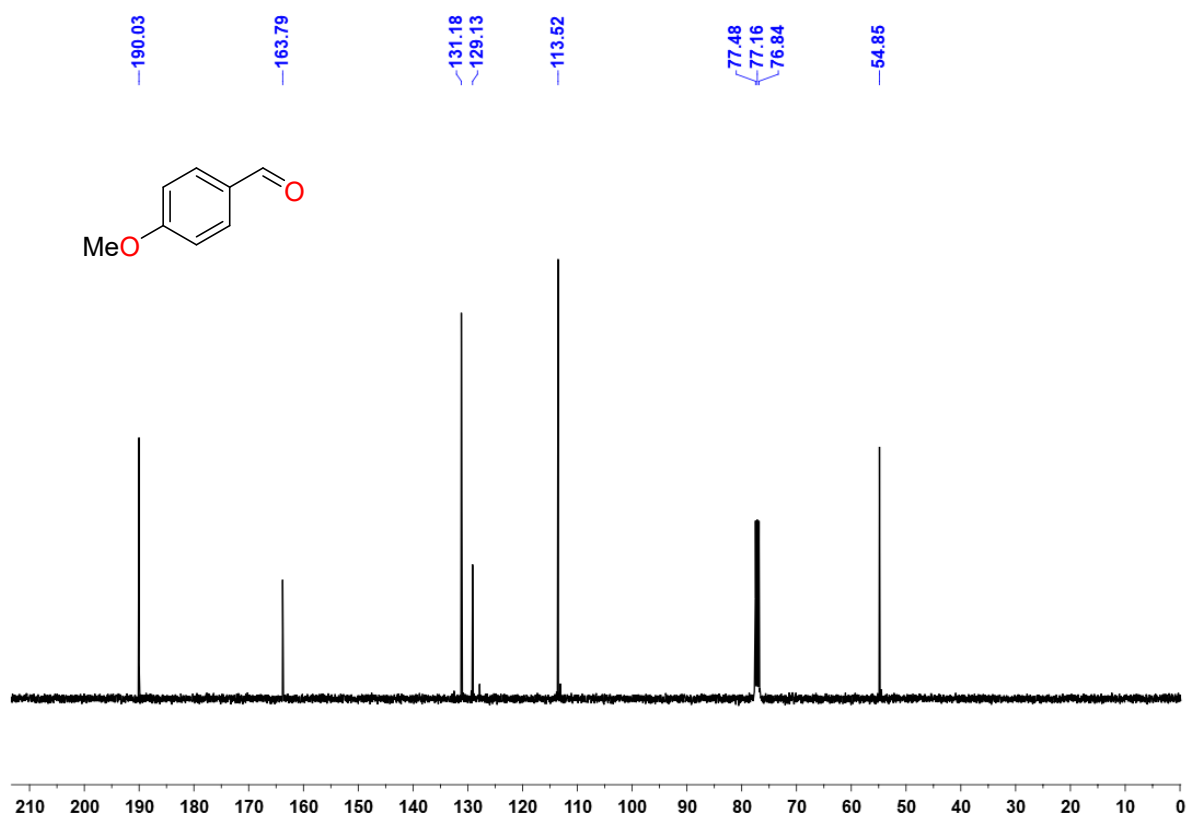

Fig. S24.  $^{13}\text{C}\{^1\text{H}\}$  NMR spectrum of 4-methoxybenzaldehyde ( $\text{P}_2$ ) in  $\text{CDCl}_3$  at r.t.

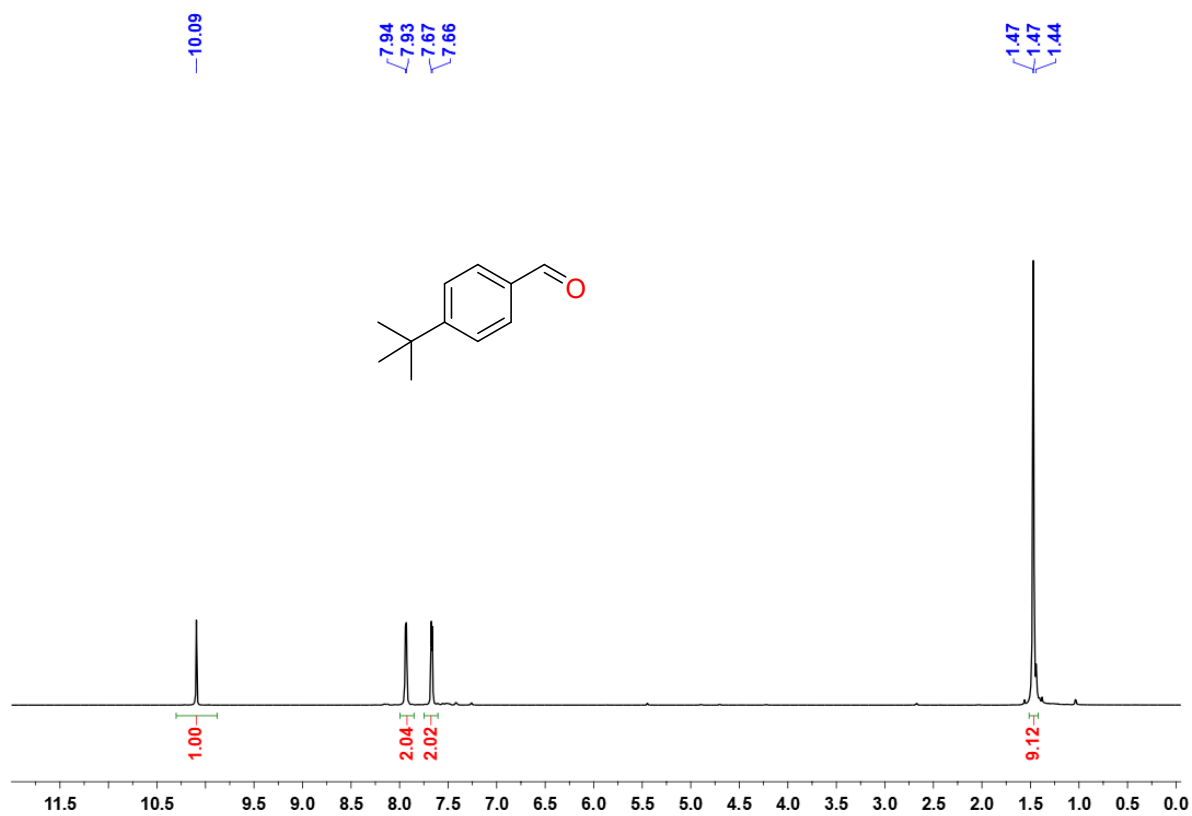

Fig. S25. <sup>1</sup>H NMR spectrum of 4-(*tert*-butyl)benzaldehyde (P<sub>3</sub>) in CDCl<sub>3</sub> at r.t.

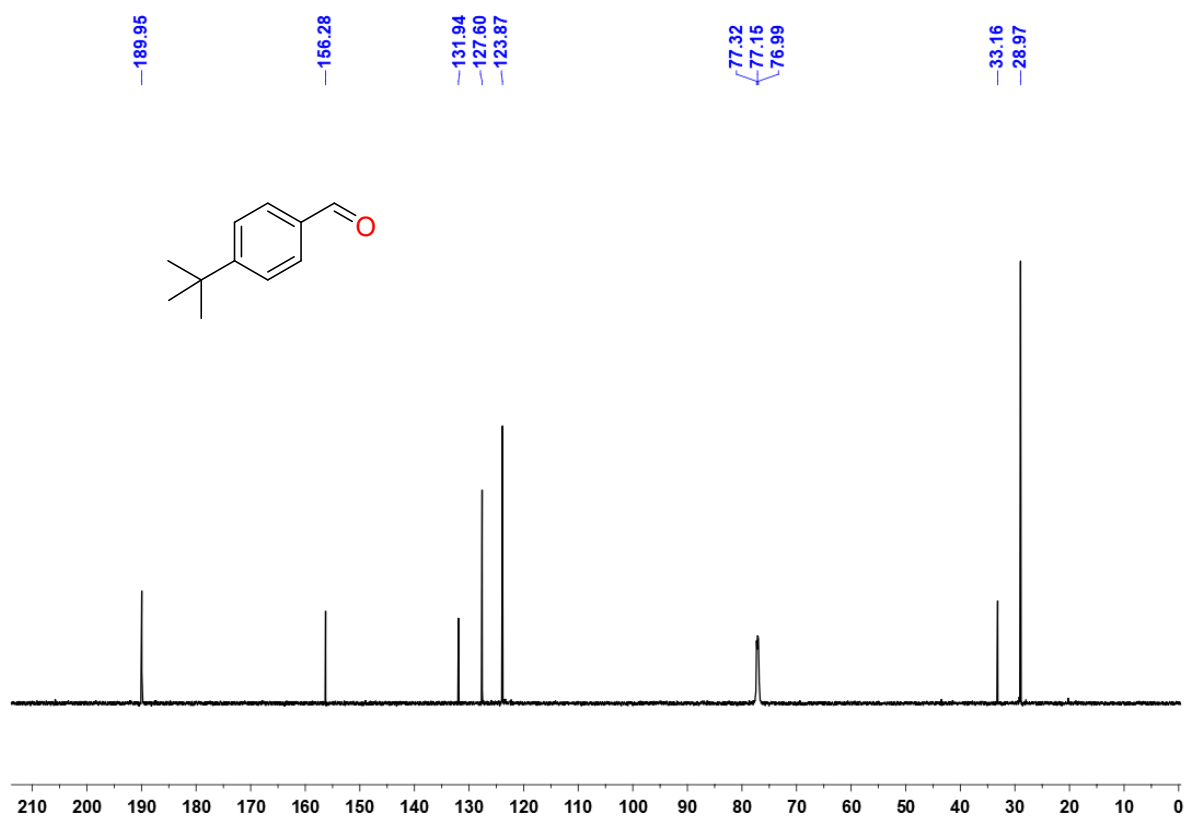

Fig. S26. <sup>13</sup>C {<sup>1</sup>H} NMR spectrum of 4-(*tert*-butyl)benzaldehyde (P<sub>3</sub>) in CDCl<sub>3</sub> at r.t.

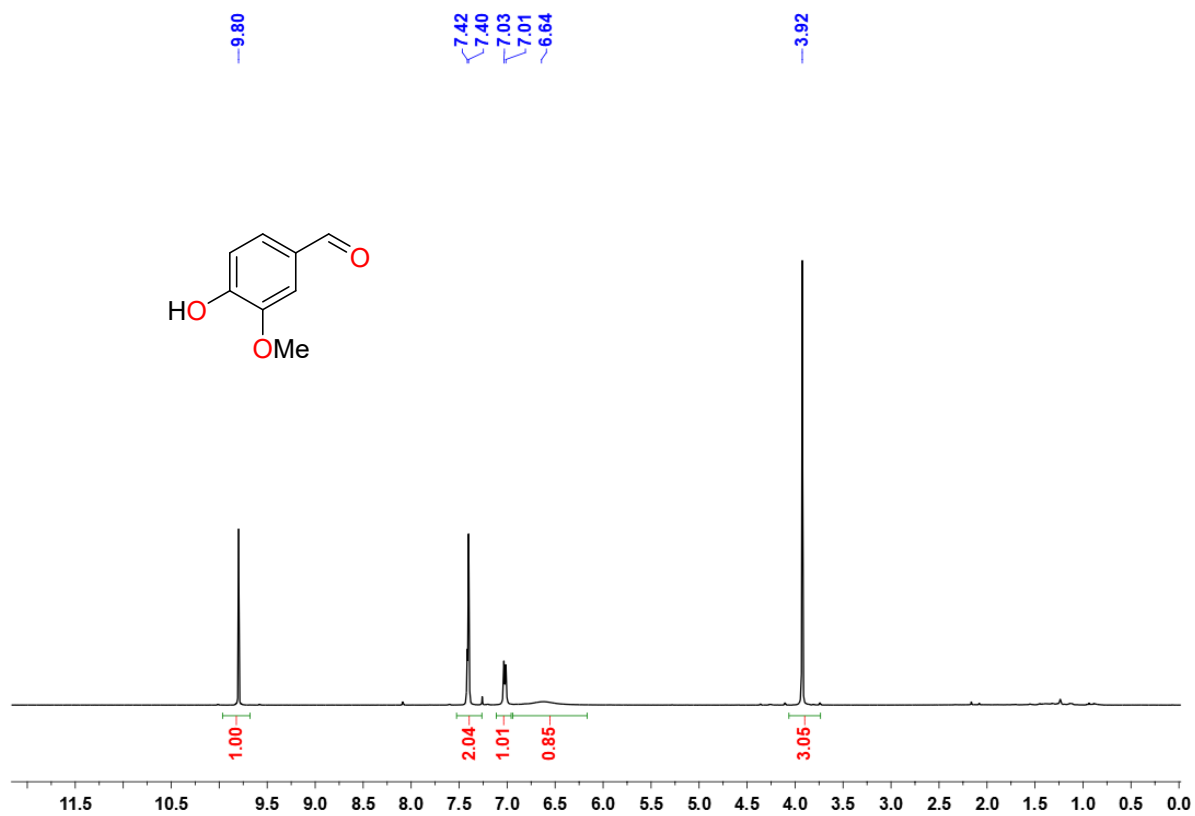

Fig. S27.  $^1\text{H}$  NMR spectrum of 4-hydroxy-3-methoxybenzaldehyde ( $P_4$ ) in  $\text{CDCl}_3$  at r.t.

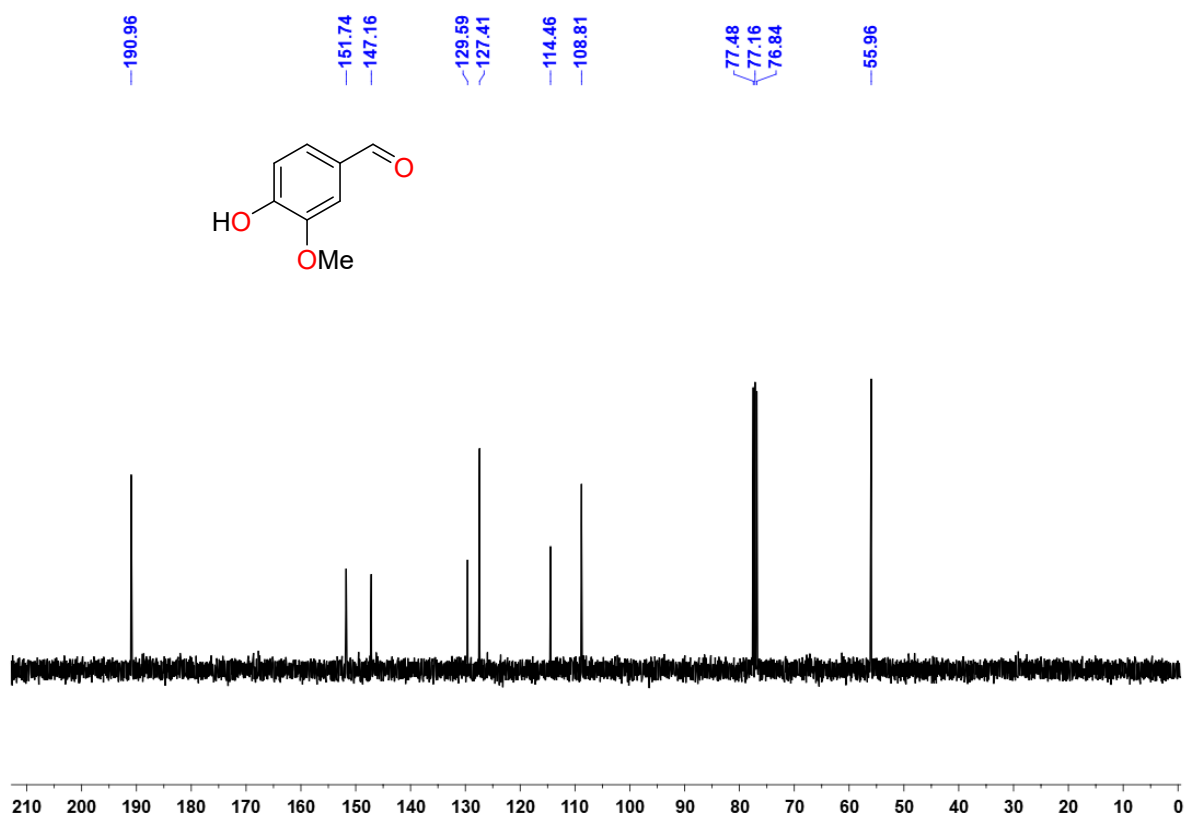

Fig. S28.  $^{13}\text{C}\{^1\text{H}\}$  NMR spectrum of 4-hydroxy-3-methoxybenzaldehyde ( $P_4$ ) in  $\text{CDCl}_3$  at r.t.

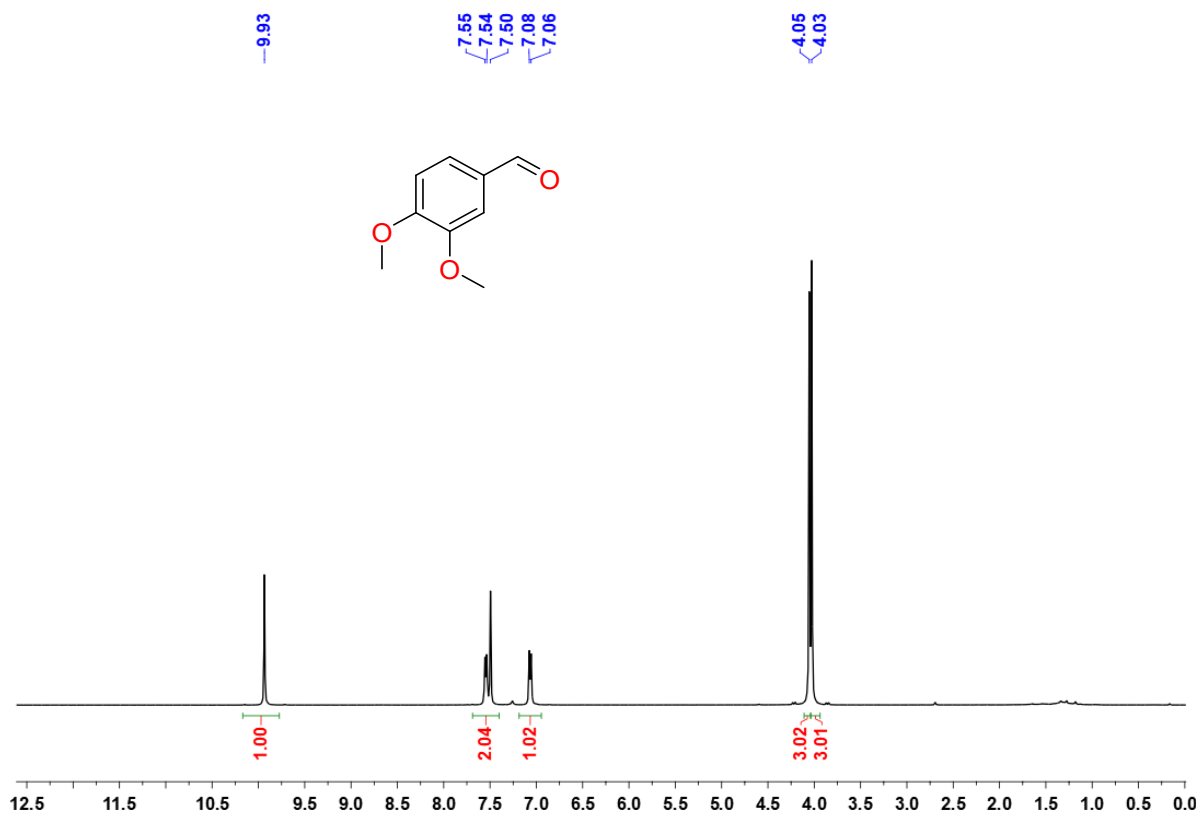

Fig. S29. <sup>1</sup>H NMR spectrum of veratraldehyde (P<sub>5</sub>) in CDCl<sub>3</sub> at r.t.

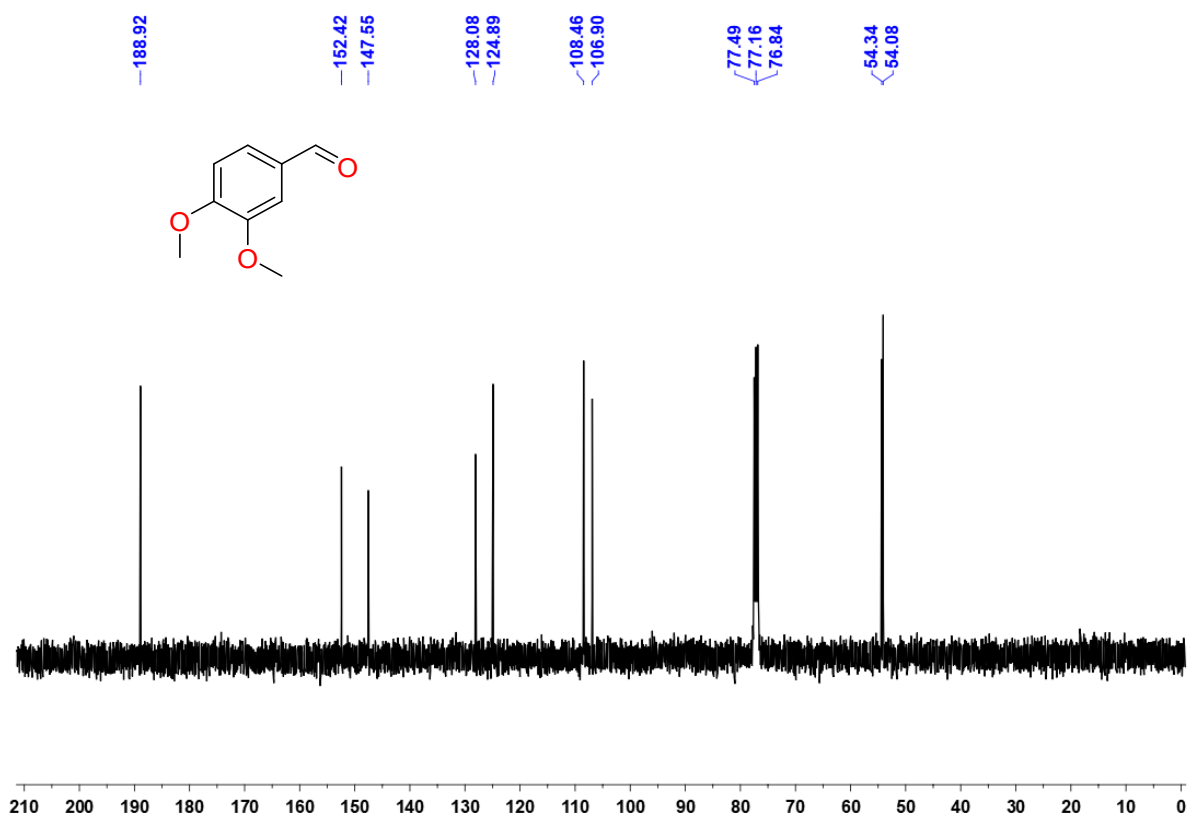

Fig. S30. <sup>13</sup>C {<sup>1</sup>H} NMR spectrum of veratraldehyde (P<sub>5</sub>) in CDCl<sub>3</sub> at r.t.

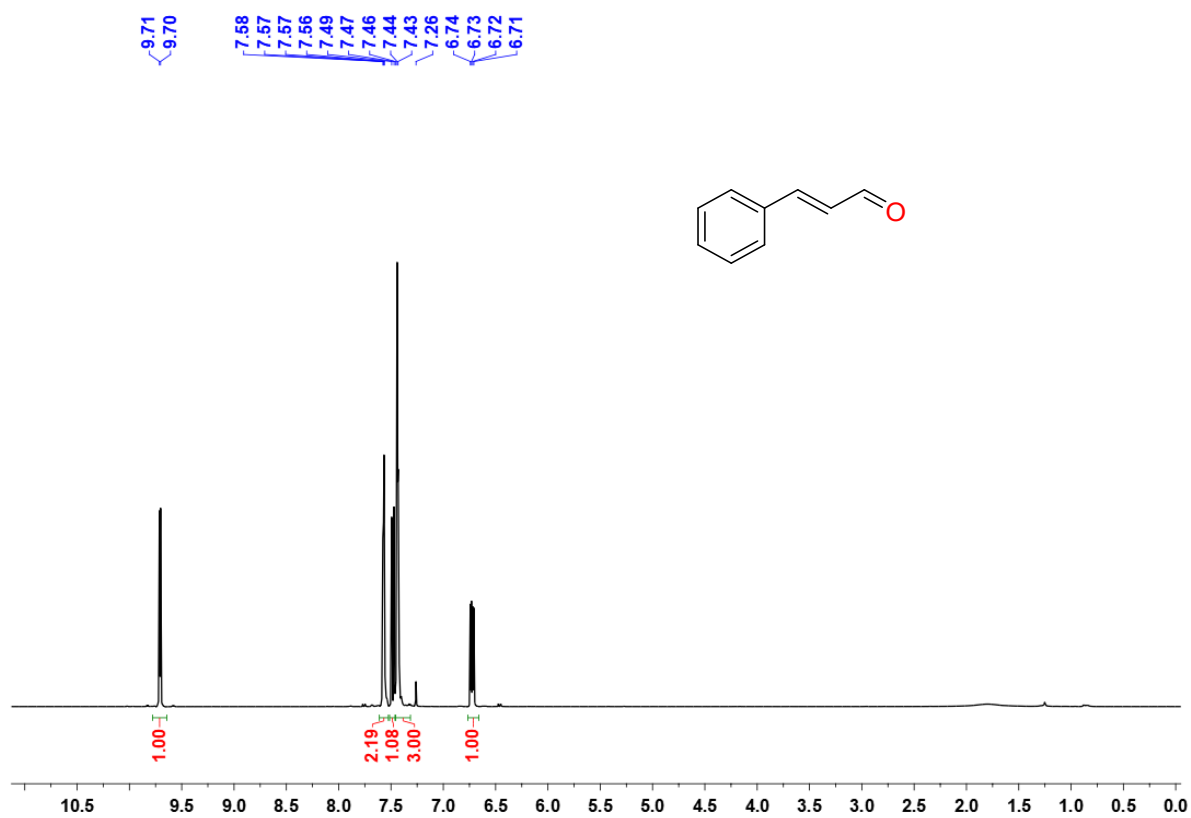

Fig. S31. <sup>1</sup>H NMR spectrum of cinnamaldehyde (P<sub>6</sub>) in CDCl<sub>3</sub> at r.t.

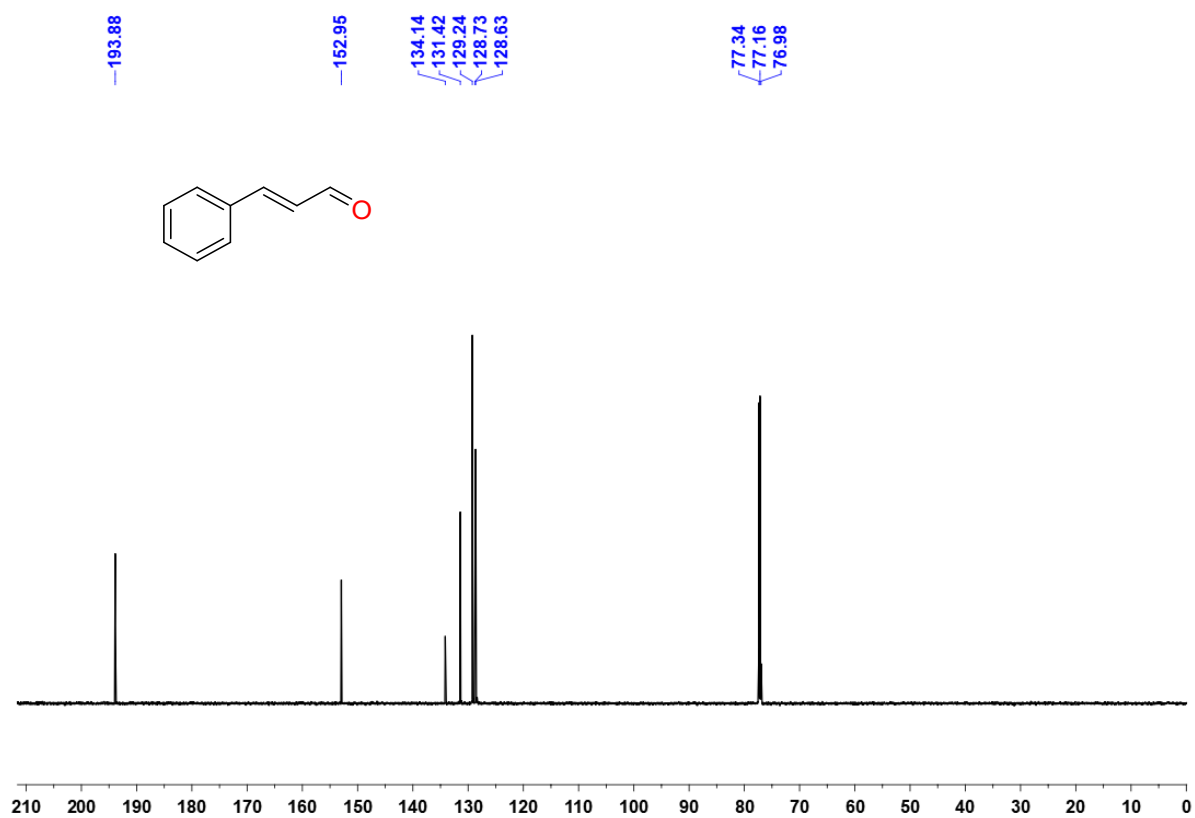

Fig. S32. <sup>13</sup>C {<sup>1</sup>H} NMR spectrum of cinnamaldehyde (P<sub>6</sub>) in CDCl<sub>3</sub> at r.t.

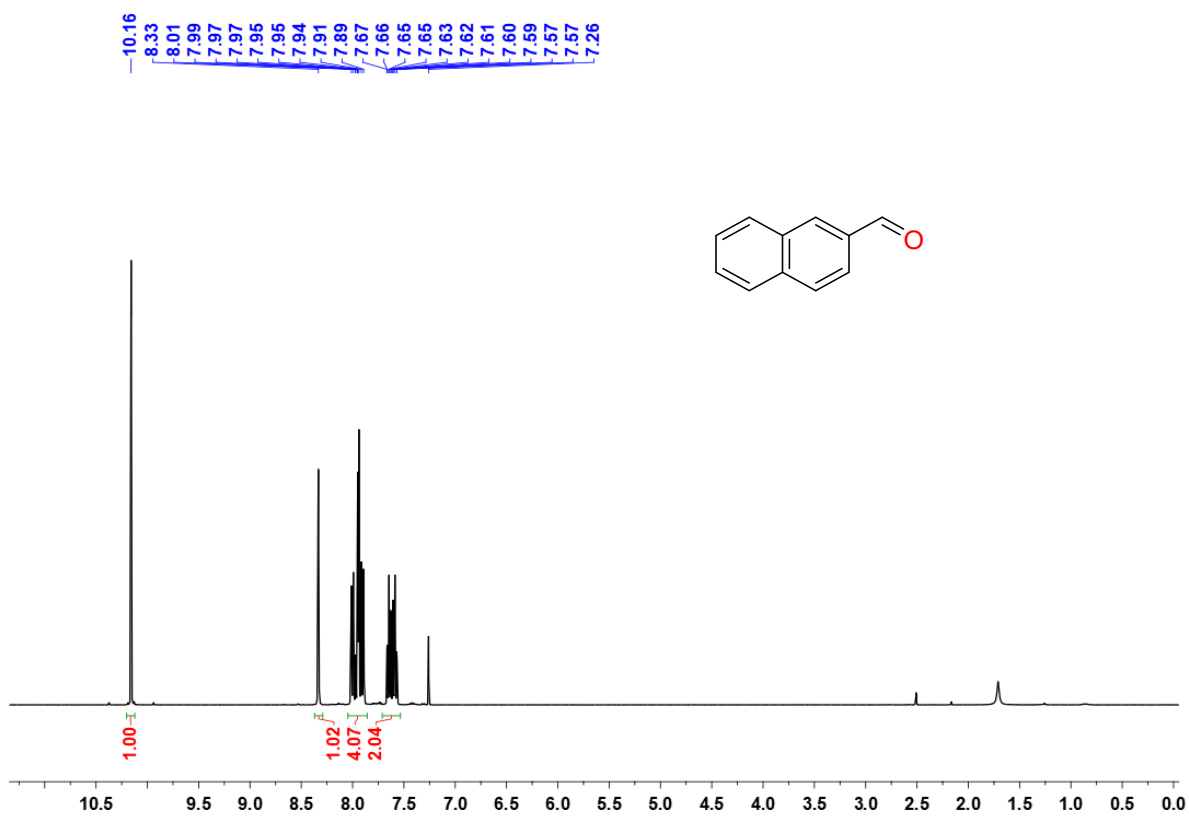

Fig. S33.  $^1\text{H}$  NMR spectrum of 2-naphthaldehyde ( $\text{P}_7$ ) in  $\text{CDCl}_3$  at r.t.

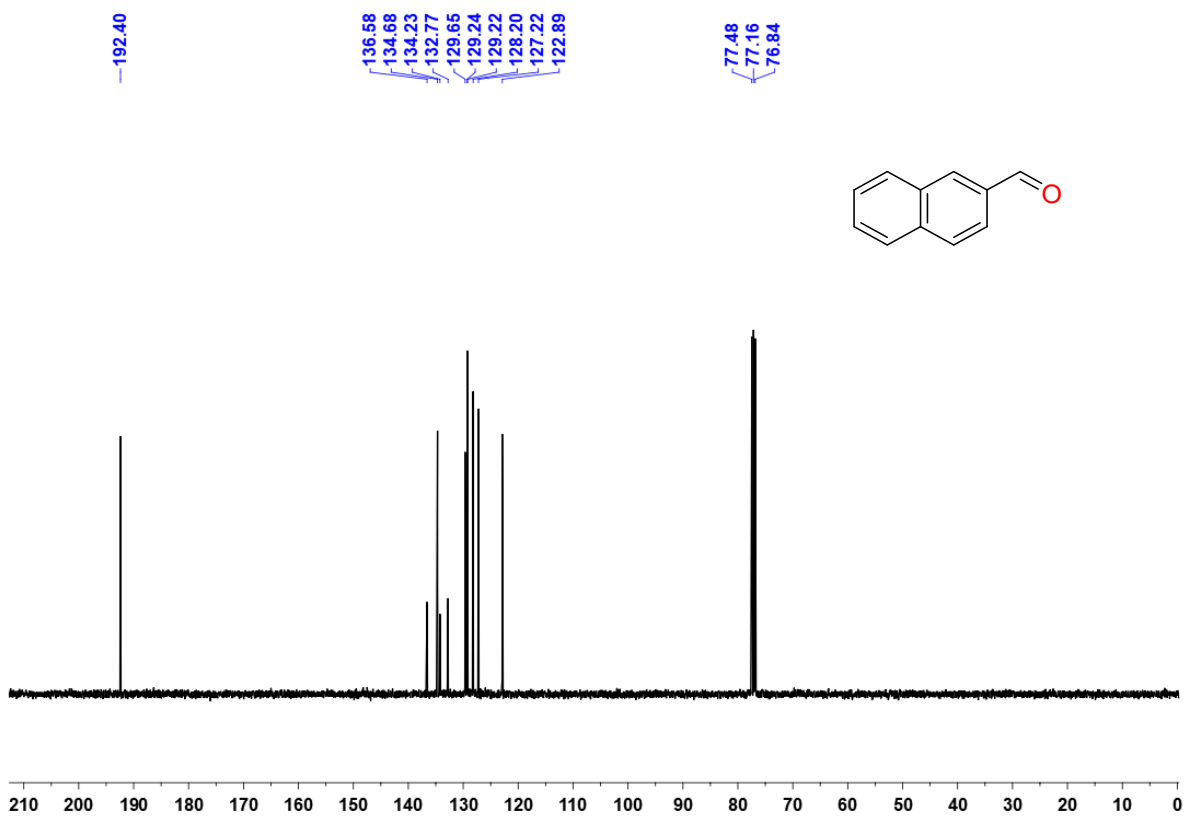

Fig. S34.  $^{13}\text{C}\{^1\text{H}\}$  NMR spectrum of 2-naphthaldehyde ( $\text{P}_7$ ) in  $\text{CDCl}_3$  at r.t.

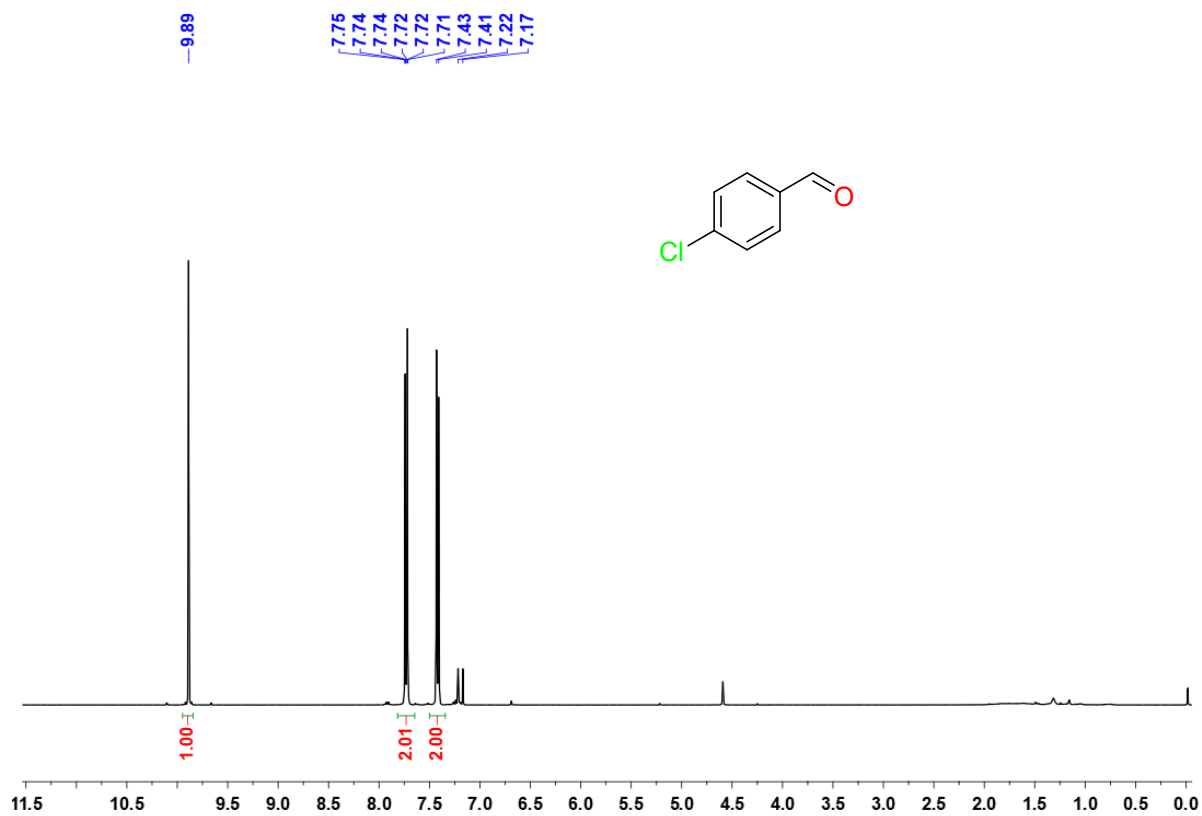

Fig. S35.  $^1\text{H}$  NMR spectrum of 4-chlorobenzaldehyde ( $\text{P}_8$ ) in  $\text{CDCl}_3$  at r.t.

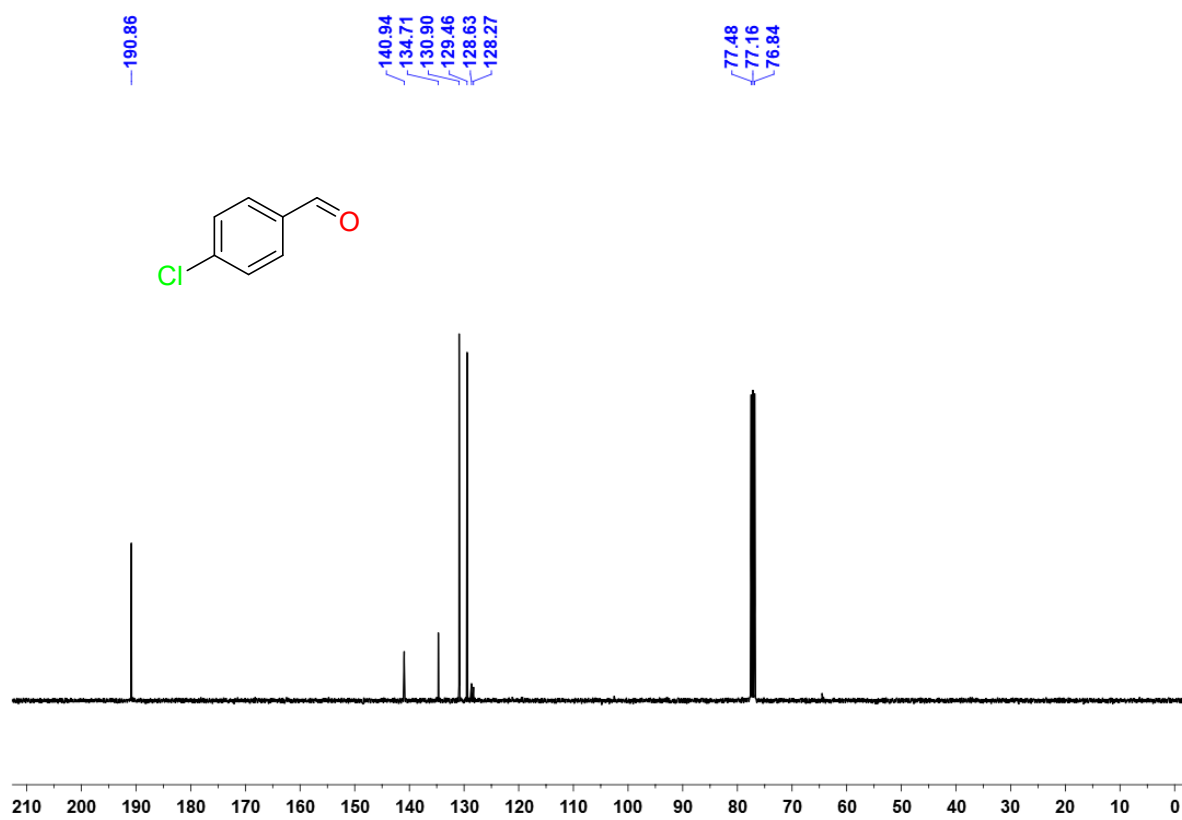

Fig. S36.  $^{13}\text{C}\{^1\text{H}\}$  NMR spectrum of 4-chlorobenzaldehyde ( $\text{P}_8$ ) in  $\text{CDCl}_3$  at r.t.



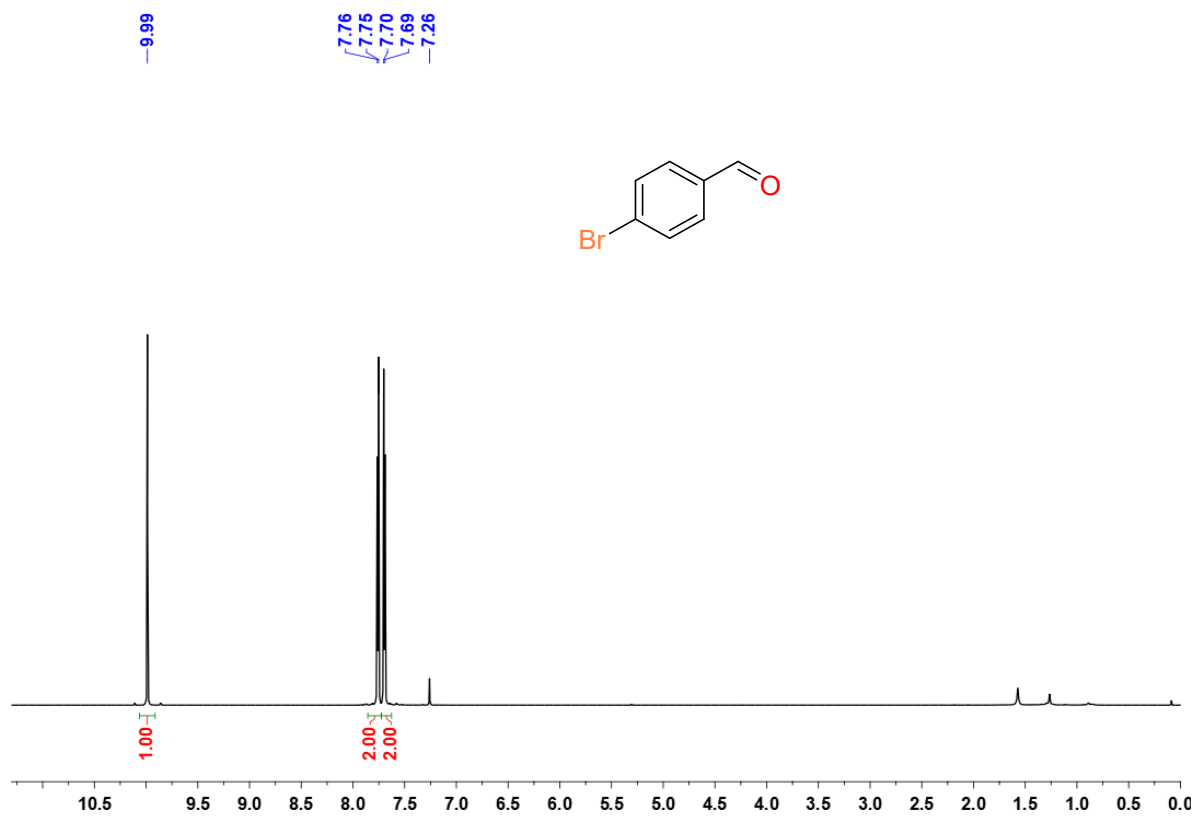

Fig. S37.  $^1\text{H}$  NMR spectrum of 4-bromobenzaldehyde (**P<sub>9</sub>**) in  $\text{CDCl}_3$  at r.t.

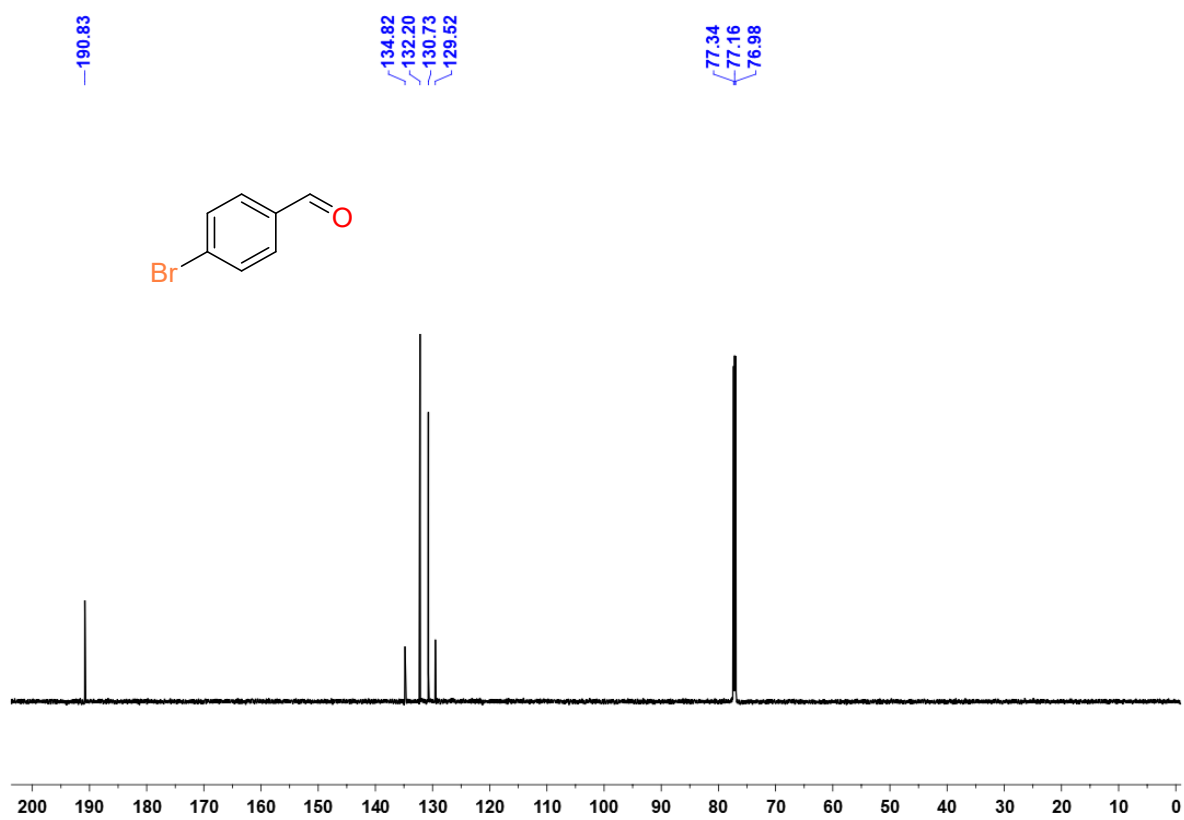

Fig. S38.  $^{13}\text{C}\{^1\text{H}\}$  NMR spectrum of 4-bromobenzaldehyde (**P<sub>9</sub>**) in  $\text{CDCl}_3$  at r.t.

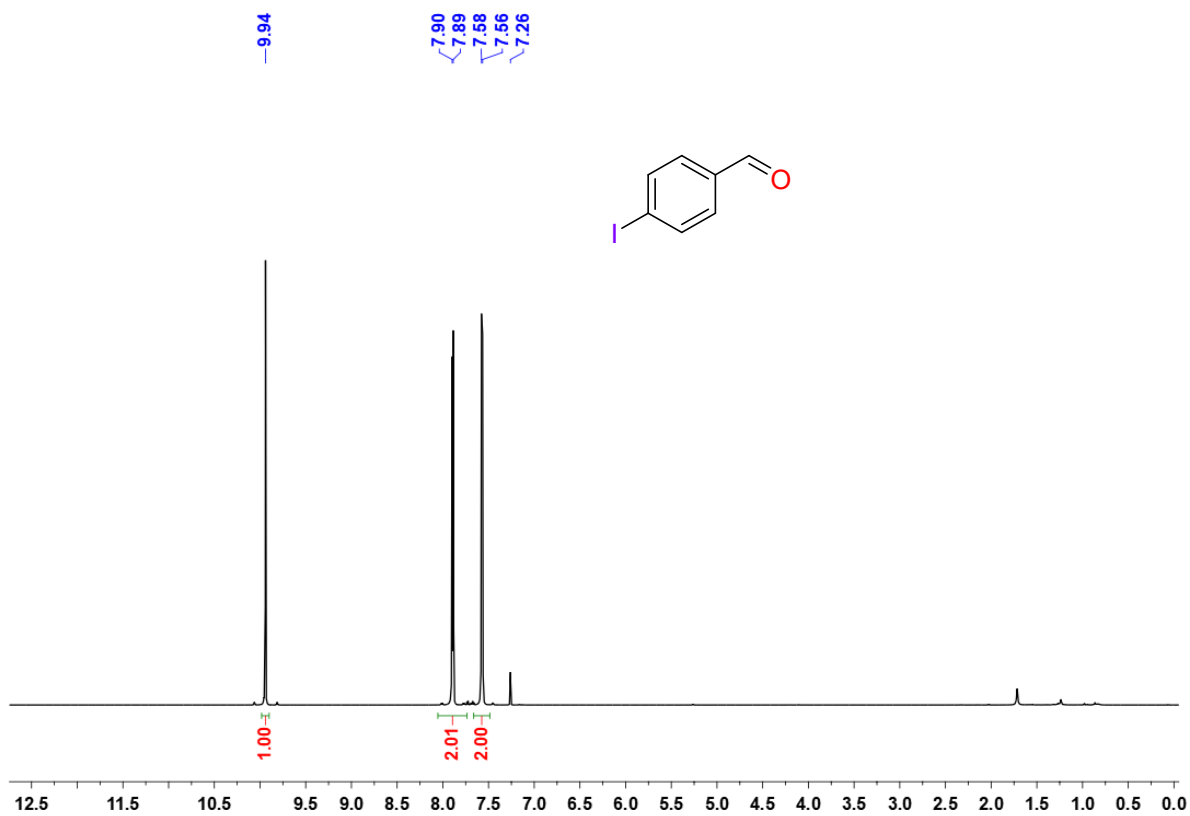

Fig. S39.  $^1\text{H}$  NMR spectrum of 4-iodobenzaldehyde ( $\text{P}_{10}$ ) in  $\text{CDCl}_3$  at r.t.

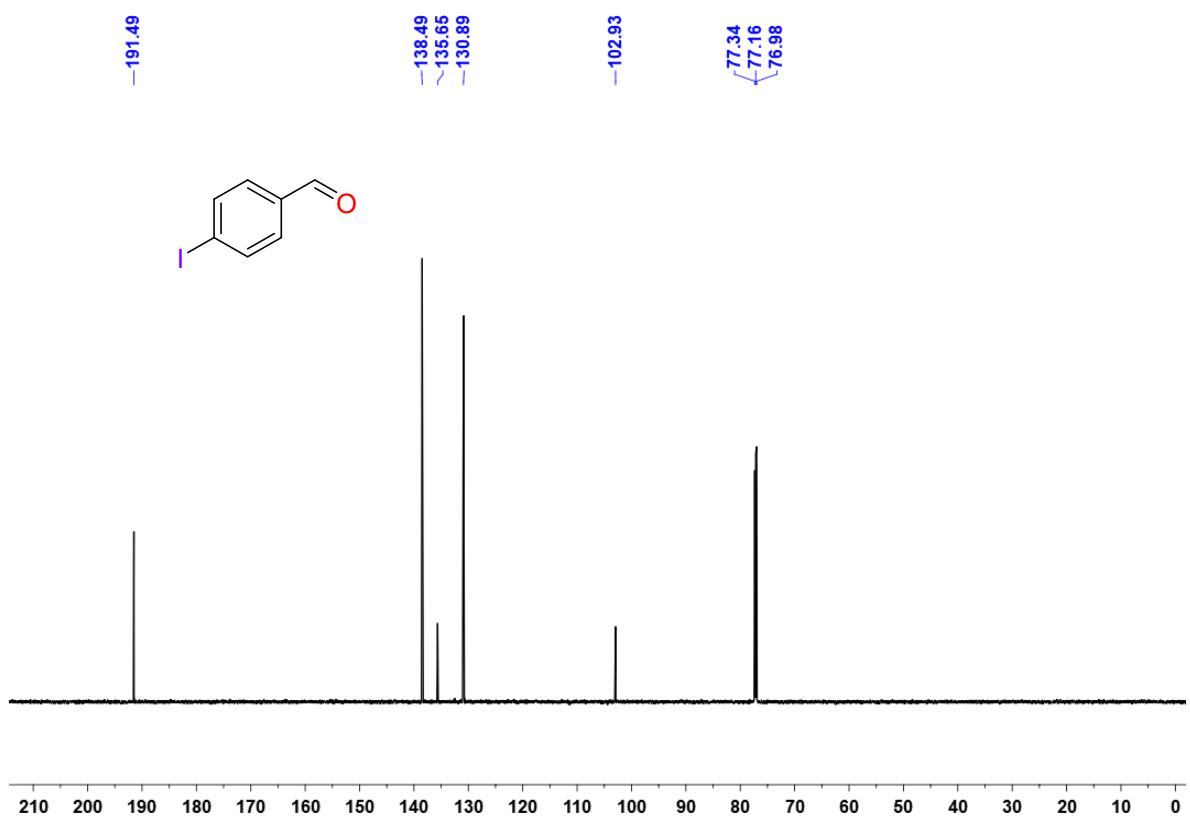

Fig. S40.  $^{13}\text{C}\{^1\text{H}\}$  NMR spectrum of 4-iodobenzaldehyde ( $\text{P}_{10}$ ) in  $\text{CDCl}_3$  at r.t.

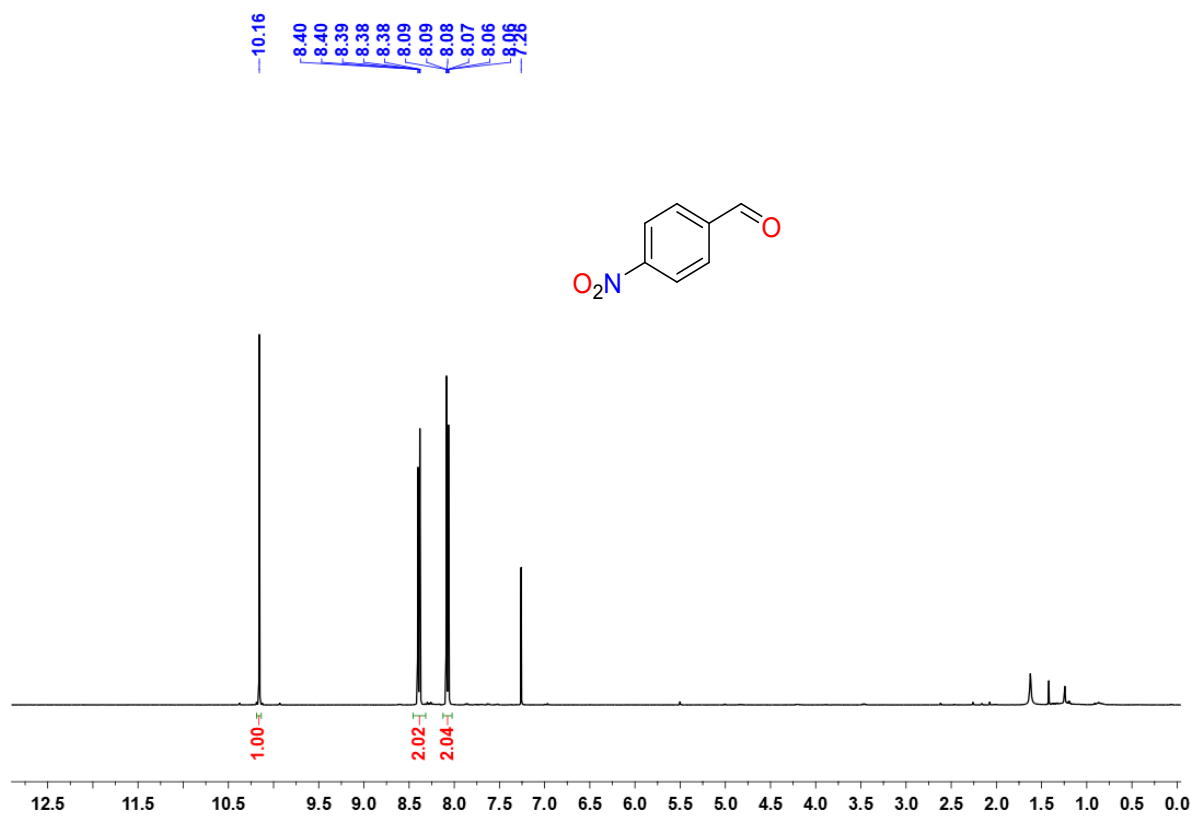

Fig. S41.  $^1\text{H}$  NMR spectrum of 4-nitrobenzaldehyde ( $\text{P}_{11}$ ) in  $\text{CDCl}_3$  at r.t.

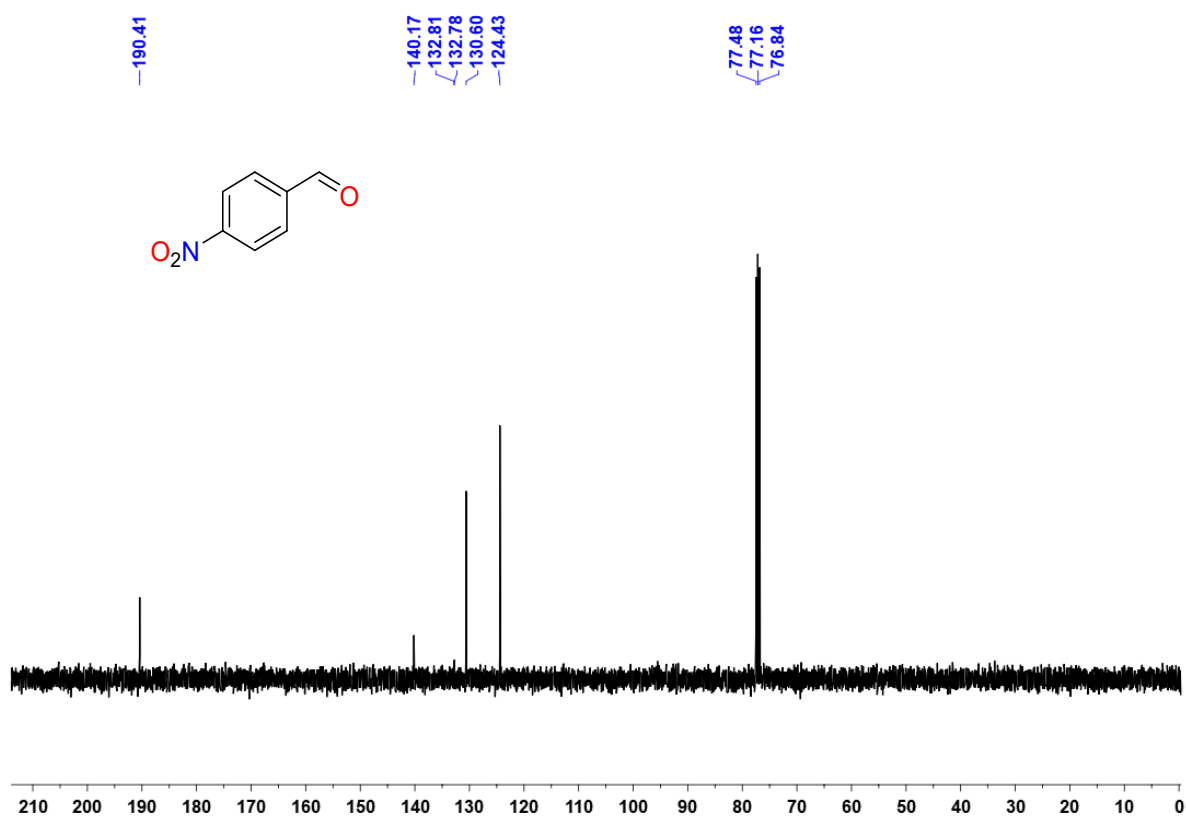

Fig. S42.  $^{13}\text{C}\{^1\text{H}\}$  NMR spectrum of 4-nitrobenzaldehyde ( $\text{P}_{11}$ ) in  $\text{CDCl}_3$  at r.t.

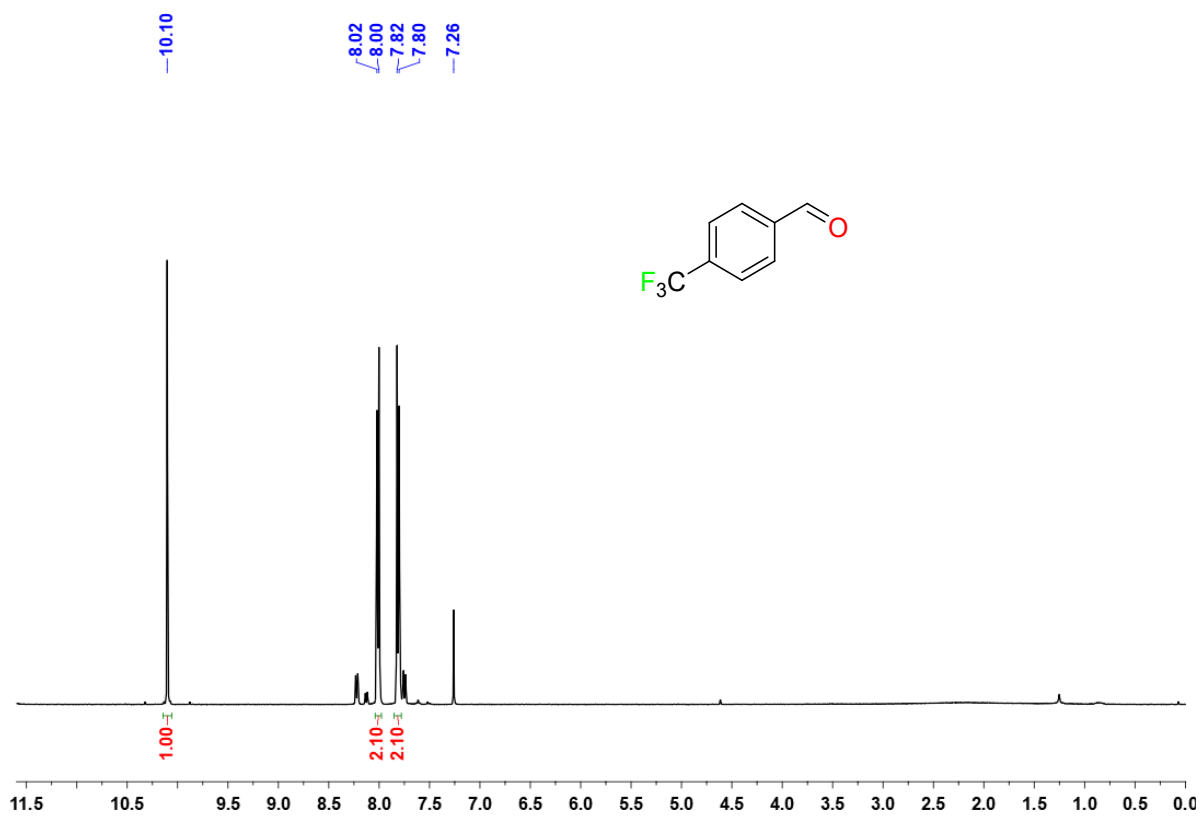

Fig. S43.  $^1\text{H}$  NMR spectrum of 4-(trifluoromethyl)benzaldehyde ( $\text{P}_{12}$ ) in  $\text{CDCl}_3$  at r.t.

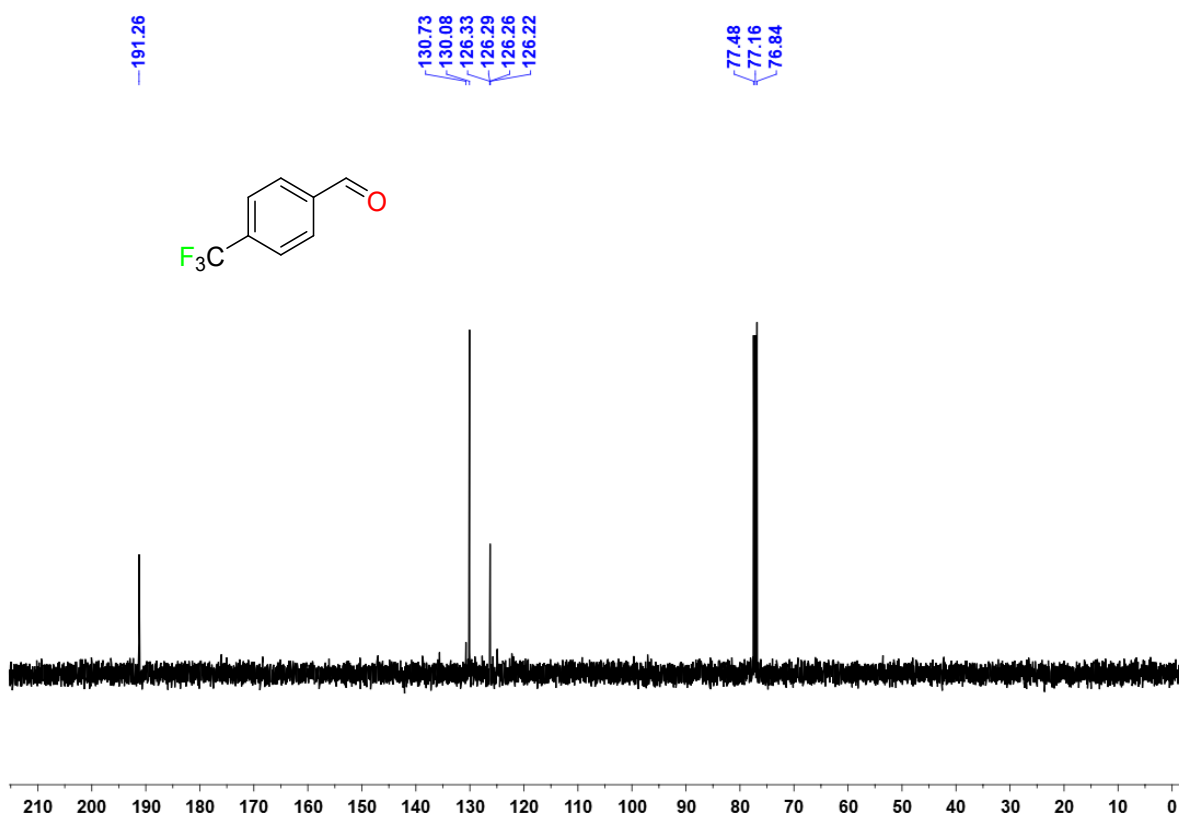

Fig. S44.  $^{13}\text{C}\{^1\text{H}\}$  NMR spectrum of 4-(trifluoromethyl)benzaldehyde ( $\text{P}_{12}$ ) in  $\text{CDCl}_3$  at r.t.

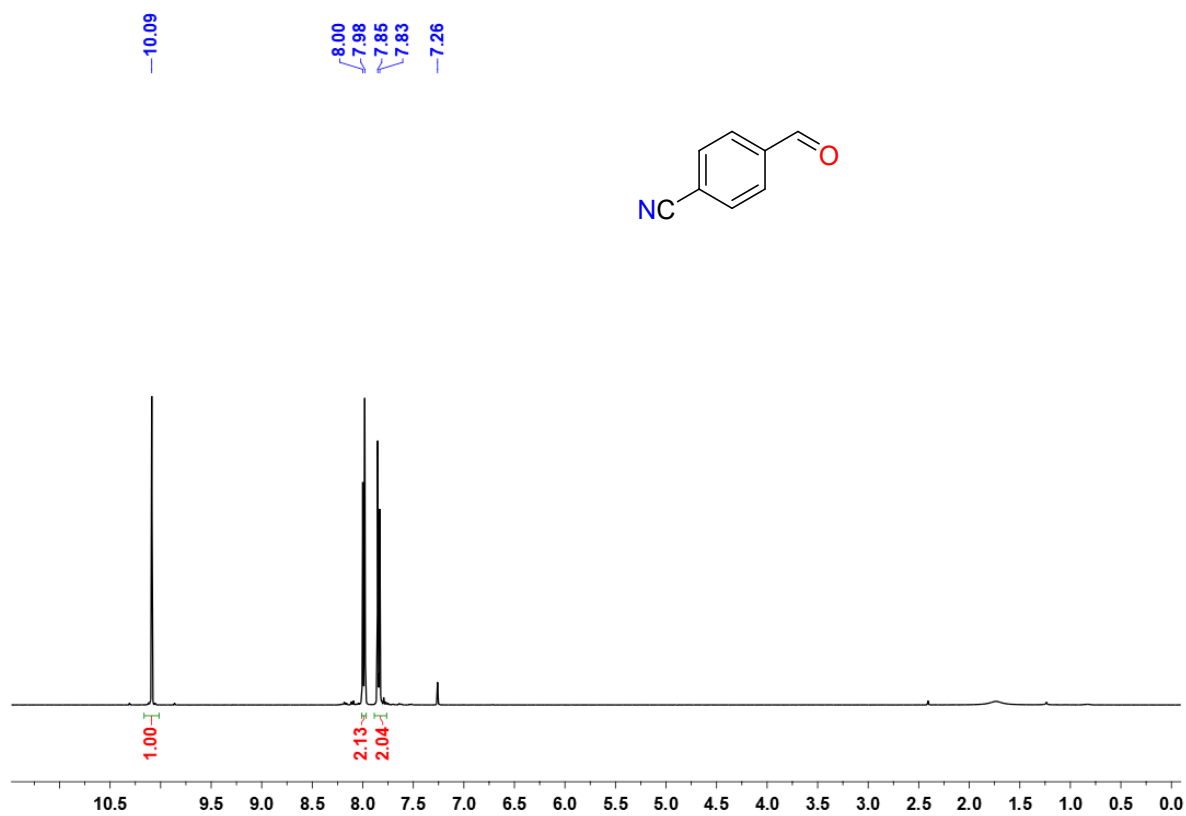

Fig. S45.  $^1\text{H}$  NMR spectrum of 4-formylbenzonitrile ( $\text{P}_3$ ) in  $\text{CDCl}_3$  at r.t. (\* indicates H-grease).

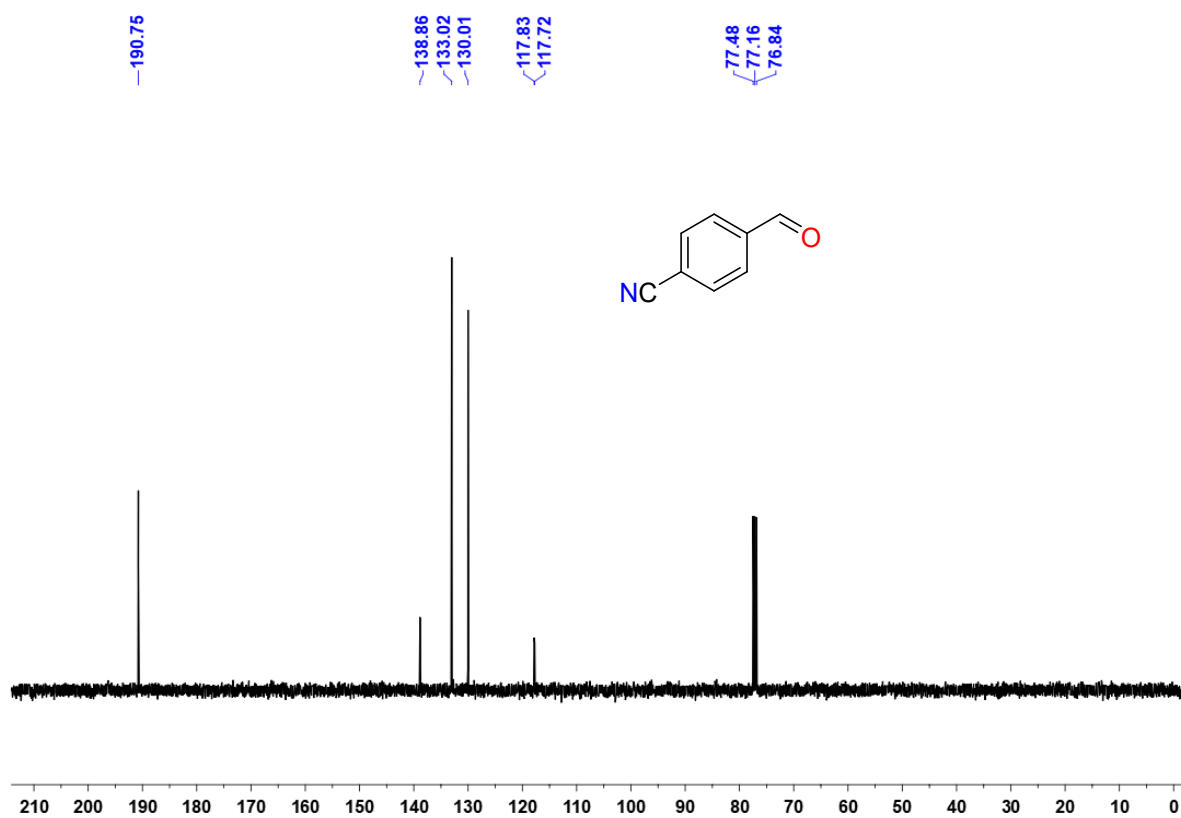

Fig. S46.  $^{13}\text{C}\{^1\text{H}\}$  NMR spectrum of 4-formylbenzonitrile ( $\text{P}_{13}$ ) in  $\text{CDCl}_3$  at r.t.

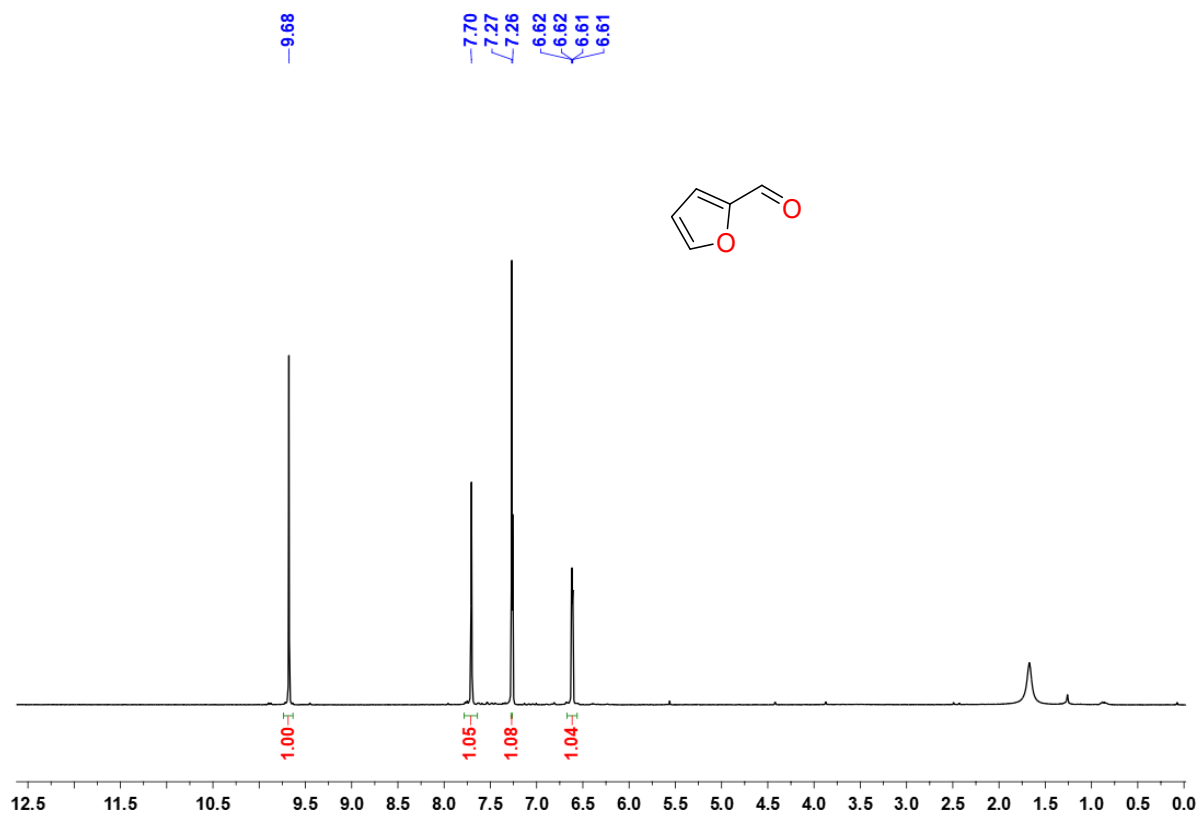

Fig. S47.  $^1\text{H}$  NMR spectrum of furan-2-carbaldehyde ( $\text{P}_{14}$ ) in  $\text{CDCl}_3$  at r.t.

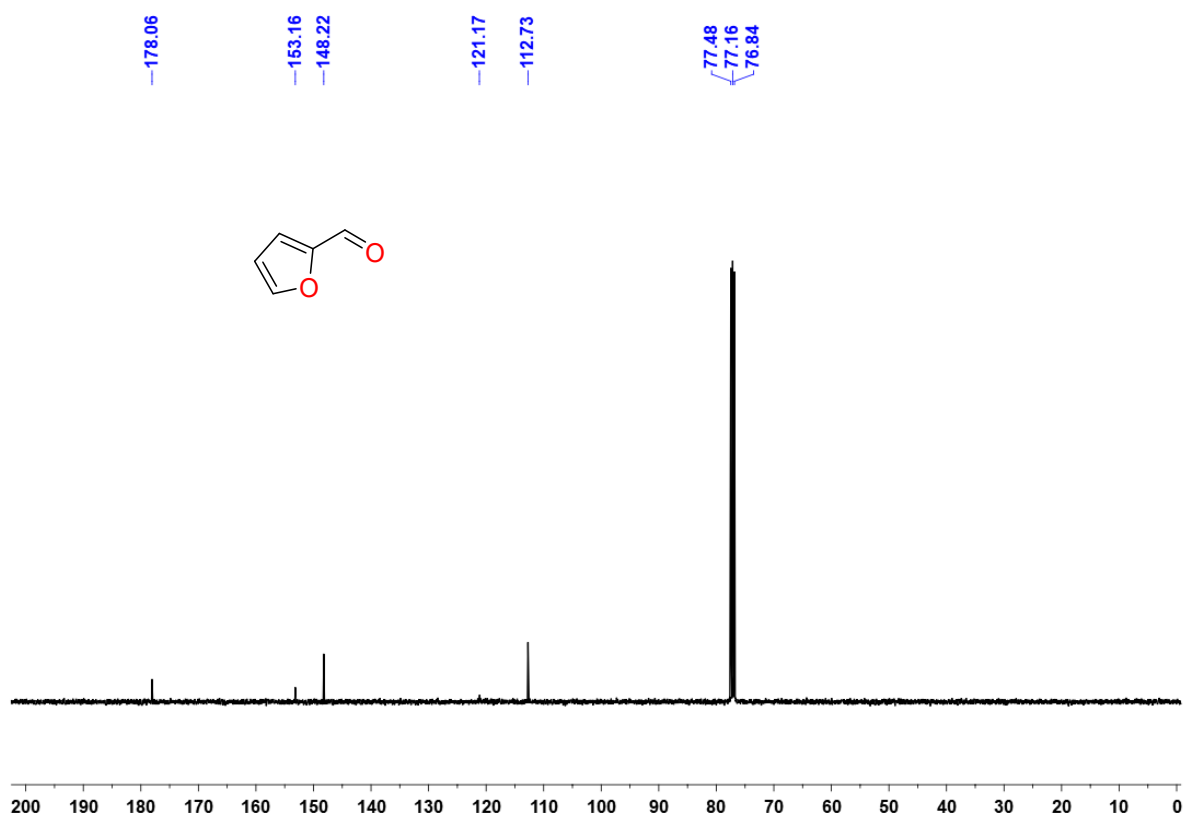

Fig. S48.  $^{13}\text{C}\{^1\text{H}\}$  NMR spectrum of furan-2-carbaldehyde ( $\text{P}_{14}$ ) in  $\text{CDCl}_3$  at r.t.

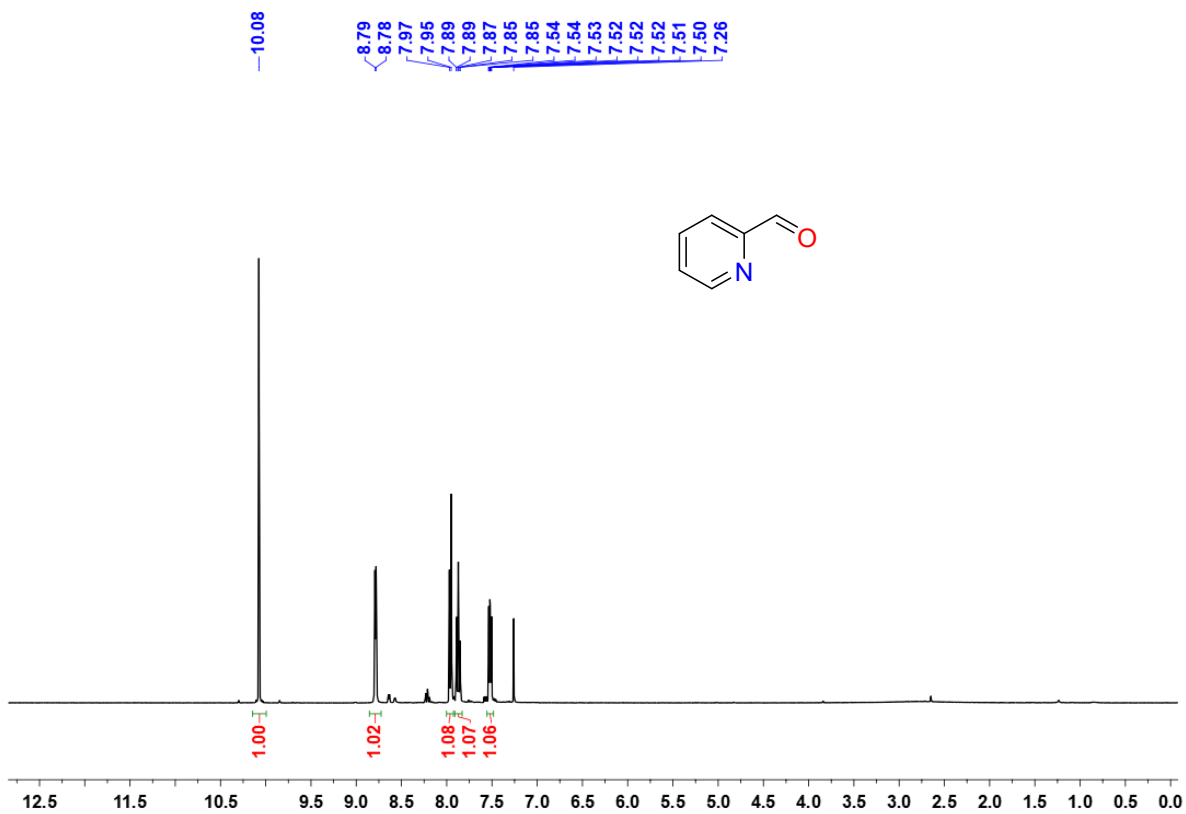

Fig. S49.  $^1\text{H}$  NMR spectrum of picolinaldehyde ( $\text{P}_{15}$ ) in  $\text{CDCl}_3$  at r.t.

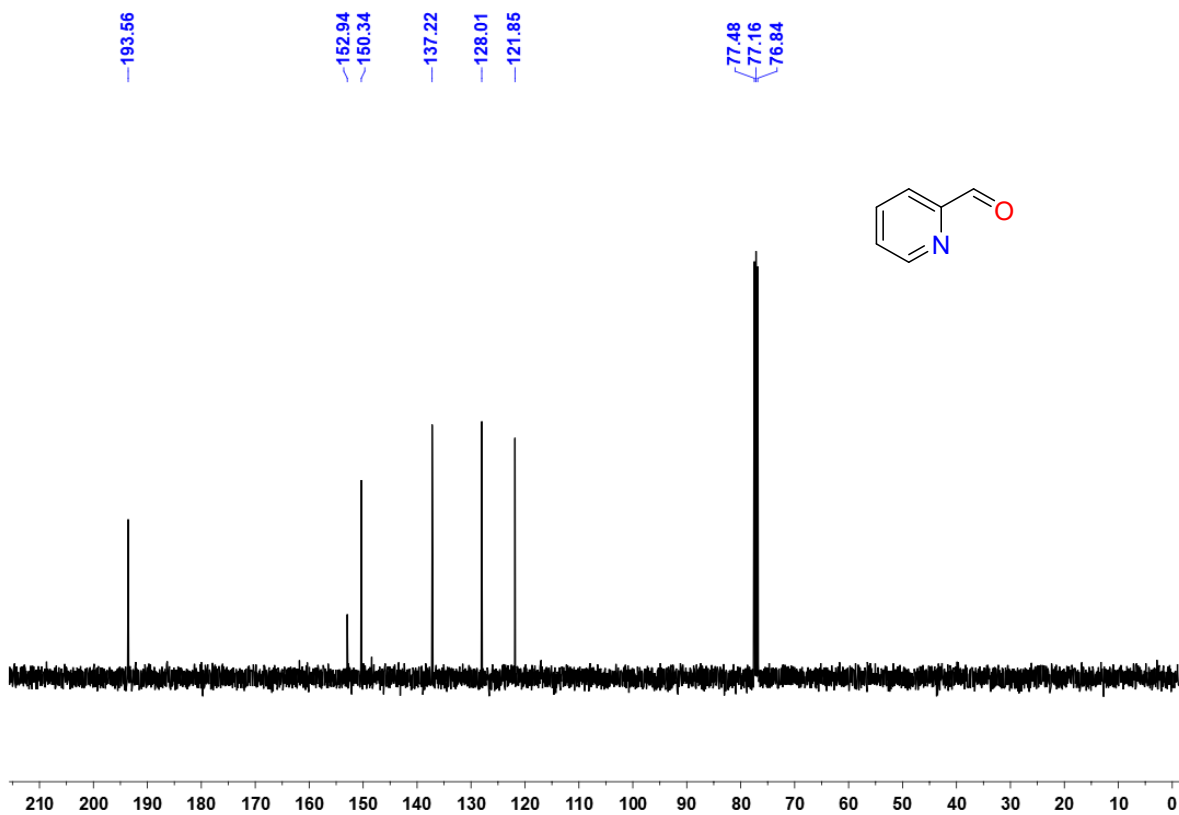

Fig. S50.  $^{13}\text{C}\{^1\text{H}\}$  NMR spectrum of picolinaldehyde ( $\text{P}_{15}$ ) in  $\text{CDCl}_3$  at r.t.

## References

- S1 A. De, A. Sengupta, F. Lloret and R. Mukherjee, *Z. Anorg. Allg. Chem.*, 2018, **644**, 801–811.
- S2 G. A. van Albada, I. Mutikanien, O. Roubeau, U. Turpienen and J. Reedijk, *Inorg. Chim. Acta*, 2002, **331**, 208.
- S3 J. Mukherjee, R. Gupta, T. Mallah and R. Mukherjee, *Inorg. Chim. Acta*, 2005, **358**, 2711.
- S4 J. Springborg, J. Glerup and I. Sotofte, *Acta Chem. Scand.*, 1997, **51**, 832.
- S5 A. Escuer, R. Vicente, E. Peñalba, X. Solans and M. Font-Bardía, *Inorg. Chem.*, 1996, **35**, 248.
- S6 M. Rodríguez, A. Llobet, M. Corbella, P. Müller, M. A. Usón, A. E. Martell and J. Reibenspies, *Dalton Trans.*, 2002, 2900.
- S7 D. Hu, L. Chen, Z.-Q. Pan, H. Liu, X.-G. Meng and Y. Song, *J. Coord. Chem.*, 2008, **61**, 1973.
- S8 G. A. van Albada, I. Mutikainen, O. S. Roubeau, U. Turpeinen and J. Reedijk, *Eur. J. Inorg. Chem.*, 2000, 2179.
- S9 C. Bazzicalupi, A. Bencini, A. Bianchi, V. Fusi, P. Paoletti and B. Valtancoli, *J. Chem. Soc., Chem. Commun.*, 1995, 1555.
- S10 A. Majumder, C. R. Choudhury, S. Mitra, G. M. Rosair, M. S. El Fallah and J. Ribas, *Chem. Commun.*, 2005, 2158
- S11 P. Mateus, R. Delgado, F. Lloret, J. Cano, P. Brandao and V. Félix, *Chem. Eur. J.*, 2011, **17**, 11193.
- S12 S. S. Massoud, F. R. Louka, M. A. Al-Hasan, R. Vicente and F. A. Mautner, *New J. Chem.*, 2015, **39**, 5944.
- S13 E. A. Malinina, I. K. Kochneva, I. N. Polyakova, V. V. Avdeeva, G. A. Buzanov, N. N. Efimov, E. A. Ugolkova, V. V. Minin and N. T. Kuznetsov, *Inorg. Chim. Acta*, 2018, **479**, 249.
